# Supplementary material for: LINKIN, a new transmembrane protein necessary for cell adhesion
Source: eLife journal article supplement (doi:10.7554/elife.04449), 2014-12-01
Supplement: supp [file elife-04449-supp-v1.zip]

Archive with 7 entries (7 files):
- elife_poa_e04449_Figure_6_figure_supplement_1.pdf
- elife_poa_e04449_Supplementary_File_1.xlsx
- elife_poa_e04449_Supplementary_File_2.docx
- elife_poa_e04449_Figure_3_figure_supplement_3.pdf
- elife_poa_e04449_Figure_3_figure_supplement_2.pdf
- elife_poa_e04449_Figure_3_figure_supplement_1.pdf
- elife_poa_e04449_Supplementary_File_3.docx
