# Supplementary material for: LINKIN, a new transmembrane protein necessary for cell adhesion
Source: eLife journal article supplement (doi:10.7554/elife.04449), 2014-12-01
Supplement: supp [file elife-04449-supp-v1.zip › elife_poa_e04449_Supplementary_File_1.xlsx]

## Sheet: Sheet1
Human Protein Names	Gene Names	Protein Descriptions	C. elegans homolog	Ratio LINKIN/control Abundance	Ratio LINKIN/control peptide types	Unique peptide types LINKIN	Peptide types LINKIN	Sequence Coverage [%]	Unique Sequence Coverage [%]	Mol. Weight [kDa]	Sequence Length		Column heading names	Column heading descriptors
cDNA FLJ31310 fis, clone LIVER1000165, highly similar to Haptoglobin;HP protein;Haptoglobin;Haptoglobin alpha chain;Haptoglobin beta chain	HP	cDNA FLJ31310 fis, clone LIVER1000165, highly similar to Haptoglobin;HP protein;47 kDa protein;Haptoglobin;haptoglobin isoform 2 preproprotein	no	192.55	2	2	3	12.1	12.1	31.408	281		Human Protein Names	Name of human protein identified by mass spectrometry
Ig kappa chain V-I region Roy		Ig kappa chain V-I region Roy	no	95.135	2	1	2	7.4	7.4	11.782	108		Gene Names	Human gene name
Stromal cell-derived factor 2-like protein 1;PWP1-interacting protein 8	SDF2L1;UNQ1941/PRO4424	Dihydropyrimidinase-like 2	R12E2.13	70.027	12	4	14	12.8	12.8	67.017	619		Protein Descriptions	Human protein description
Calnexin;Major histocompatibility complex class I antigen-binding protein p88;p90;IP90	CANX	cDNA FLJ55574, highly similar to Calnexin	cnx-1/crt-1	51.244	27	15	30	28.5	28.5	71.502	627		C. elegans homolog	C. elegans homolog(s) of the human genes as annotated in genecards.org
DnaJ homolog subfamily B member 11;ER-associated dnaJ protein 3;ERj3p;ERdj3;ER-associated Hsp40 co-chaperone;ER-associated DNAJ;HEDJ;hDj9;PWP1-interacting protein 4;APOBEC1-binding protein 2	DNAJB11;EDJ;ERJ3;PSEC0121;UNQ537/PRO1080	DnaJ homolog subfamily B member 11	dnj-20	39.544	10	7	15	27.7	27.7	40.513	358		Ratio LINKIN/control Abundance	Ratio of total peptide signal detected in LINKIN over control experiment for the protein
Mitochondrial glutamate carrier 1;Glutamate/H(+) symporter 1;Solute carrier family 25 member 22	SLC25A22;GC1	Mitochondrial glutamate carrier 1	F20D1.9	38.451	14	7	16	34.7	34.7	34.47	323		Ratio LINKIN/control Peptides	Ratio of # of peptide types detected in LINKIN over control experiment for the protein
Transcription factor Sp1;Sp1 transcription factor variant	SP1;TSFP1	Transcription factor Sp1;Sp1 transcription factor isoform b	no	37.77	4	2	4	5.5	5.5	80.692	785		Unique Peptides_LINKIN	# of unique peptide types identified in LINKIN experiment
T-cell immunomodulatory protein;Integrin-alpha FG-GAP repeat-containing protein 1	ITFG1;TIP;CDA08	T-cell immunomodulatory protein	lnkn-1/tag-256	34.591	122	25	262	40.2	40.2	68.107	612		Peptides LINKIN	total # of peptide types identified in LINKIN experiment
Mitochondrial 2-oxoglutarate/malate carrier protein;Solute carrier family 25 member 11	SLC25A11;SLC20A4	Mitochondrial 2-oxoglutarate/malate carrier protein;34 kDa protein;28 kDa protein	misc-1	32.15	24	11	24	44.6	44.6	34.061	314		Sequence Coverage [%]	Combined sequence coverage of the protein by peptides
Solute carrier family 25 member 33;Bone marrow stromal cell mitochondrial carrier protein;HuBMSC-MCP;Protein PNC1;Solute carrier family 25 member 36	SLC25A33;SLC25A36	Solute carrier family 25 member 33;Isoform 1 of Solute carrier family 25 member 36;Isoform 3 of Solute carrier family 25 member 36;Isoform 2 of Solute carrier family 25 member 36;9 kDa protein	T09F3.2	28.412	2	1	2	4	4	35.375	321		Unique Sequence Coverage [%]	Combined sequence coverage of the protein by unique peptides
Lipolysis-stimulated lipoprotein receptor;Putative uncharacterized protein LSR;cDNA FLJ55699, highly similar to Homo sapiens liver-specific bHLH-Zip transcription factor (LISCH7), transcript variant 3, mRNA	LSR;LISCH	Isoform 1 of Lipolysis-stimulated lipoprotein receptor;LISCH protein isoform 1;LISCH protein isoform 3;cDNA FLJ55699, highly similar to Homo sapiens liver-specific bHLH-Zip transcription factor (LISCH7), transcript variant 3, mRNA;Isoform 2 of Lipolysis-st	no	27.787	2	2	4	5.7	5.7	71.438	649		Mol. Weight [kDa]	Molecular weight of the protien
Sigma 1-type opioid receptor;SR31747-binding protein;Aging-associated gene 8 protein	OPRS1;SIGMAR1;SRBP;AAG8	Isoform 1 of Sigma 1-type opioid receptor;Isoform 3 of Sigma 1-type opioid receptor;Isoform 4 of Sigma 1-type opioid receptor	no	26.071	2	1	2	5.8	5.8	25.127	223		Sequence Length	Amino acid length of the protein
Vesicular integral-membrane protein VIP36;Lectin mannose-binding 2;Glycoprotein GP36b	LMAN2;C5orf8	Vesicular integral-membrane protein VIP36	ile-2	22.629	22	13	29	44.9	44.9	40.228	356
Stromal cell-derived factor 2	SDF2	Stromal cell-derived factor 2	R12E2.13 (rep)	18.673	5	3	6	28.9	28.9	23.026	211
Probable glutathione peroxidase 8;Glutathione peroxidase	GPX8;UNQ847/PRO1785	Probable glutathione peroxidase 8;cDNA FLJ52011, moderately similar to Glutathione peroxidase 7	no	18.576	7	3	9	25.4	25.4	23.909	209
Tubulin beta chain;Tubulin beta-5 chain;cDNA FLJ50617, highly similar to Tubulin beta-7 chain;Beta-4 tubulin;cDNA FLJ53063, highly similar to Tubulin beta-7 chain;cDNA FLJ52029, highly similar to Tubulin beta-7 chain;cDNA FLJ53012, highly similar to Tubulin beta-7 chain	TUBB;TUBB5;OK/SW-cl.56;DAAP-285E11.4-003;DADB-118P11.3-003;DAMA-26D6.3-003;DAMC-316D20.4-003;DAQB-47P19.9-003;DASS-191K16.2-003;XXbac-BCX111D4.2-003;XXbac-BPG252P9.4-003;XTP3TPATP1	Tubulin beta chain;Tubulin, beta polypeptide;Tubulin, beta;cDNA FLJ53063, highly similar to Tubulin beta-7 chain;cDNA FLJ52029, highly similar to Tubulin beta-7 chain;cDNA FLJ53012, highly similar to Tubulin beta-7 chain	mec-7/ben-1	18.405	94	6	101	75.5	17.1	49.67	444
Uncharacterized protein C7orf44	C7orf44	Uncharacterized protein C7orf44	no	18.32	2	1	2	17.8	17.8	16.694	146
ADP/ATP translocase 2;Adenine nucleotide translocator 2;ADP,ATP carrier protein 2;Solute carrier family 25 member 5;ADP,ATP carrier protein, fibroblast isoform	SLC25A5;ANT2	ADP/ATP translocase 2	K01H12.2	17.981	22	7	23	29.5	16.4	32.895	298
Dolichyl-phosphate beta-glucosyltransferase;Asparagine-linked glycosylation protein 5;cDNA FLJ56758, highly similar to Dolichyl-phosphate beta-glucosyltransferase (EC 2.4.1.117);cDNA FLJ54134, highly similar to Dolichyl-phosphate beta-glucosyltransferase (EC 2.4.1.117)	ALG5;HSPC149	Dolichyl-phosphate beta-glucosyltransferase;cDNA FLJ56758, highly similar to Dolichyl-phosphate beta-glucosyltransferase;dolichyl-phosphate beta-glucosyltransferase isoform 2	H43I07.3	16.91	6	4	7	20.1	20.1	36.946	324
RuvB-like 1;49 kDa TATA box-binding protein-interacting protein;TIP49a;Pontin 52;Nuclear matrix protein 238;54 kDa erythrocyte cytosolic protein;TIP60-associated protein 54-alpha;INO80 complex subunit H;cDNA FLJ34844 fis, clone NT2NE2011154, highly similar to RuvB-like 1	RUVBL1;INO80H;NMP238;TIP49;TIP49A	Isoform 1 of RuvB-like 1;Isoform 2 of RuvB-like 1;cDNA FLJ34844 fis, clone NT2NE2011154, highly similar to RuvB-like 1	ruvb-1	16.626	49	18	53	55.9	55.9	50.227	456
Tubulin alpha-1B chain;Tubulin alpha-ubiquitous chain;Alpha-tubulin ubiquitous;Tubulin K-alpha-1;cDNA FLJ60097, highly similar to Tubulin alpha-ubiquitous chain;TUBA1B protein;Tubulin alpha-4A chain;Tubulin alpha-1 chain;Alpha-tubulin 1;Testis-specific alpha-tubulin;Tubulin H2-alpha;cDNA FLJ58687, highly similar to Tubulin alpha-4 chain;Putative uncharacterized protein TUBA4A;Tubulin, alpha 1 (Te…	TUBA1B;TUBA4A;TUBA1	Tubulin alpha-1B chain;cDNA FLJ60097, highly similar to Tubulin alpha-ubiquitous chain;TUBA1B protein;>IPI:CON_00700865.3|ENSEMBL:ENSBTAP00000016242 (Bos taurus) similar to alpha-tubulin I isoform 1;Tubulin alpha-4A chain;Tubulin, alpha 1 (Testis specific)	tba-2	16.255	70	2	71	48.6	3.1	50.151	451
Phosphate carrier protein, mitochondrial;Phosphate transport protein;Solute carrier family 25 member 3;cDNA FLJ90278 fis, clone NT2RP1000325, highly similar to Phosphate carrier protein, mitochondrialprecursor	SLC25A3;PHC;OK/SW-cl.48	Isoform A of Phosphate carrier protein, mitochondrial;Isoform B of Phosphate carrier protein, mitochondrial;cDNA FLJ90278 fis, clone NT2RP1000325, highly similar to Phosphate carrier protein, mitochondrialprecursor;31 kDa protein;24 kDa protein;21 kDa prot	C33F10.12/ F01G4.6	16.173	19	9	19	26.5	26.5	40.094	362
Neutral alpha-glucosidase AB;Glucosidase II subunit alpha;Alpha-glucosidase 2	GANAB;G2AN;KIAA0088	cDNA FLJ61290, highly similar to Neutral alpha-glucosidase AB;Isoform 2 of Neutral alpha-glucosidase AB;Isoform 3 of Neutral alpha-glucosidase AB	F40F9.6 (aagr-3)	15.948	9	8	12	12.8	12.8	112.92	995
DnaJ homolog subfamily A member 1;Heat shock 40 kDa protein 4;DnaJ protein homolog 2;HDJ-2;HSJ-2;HSDJ;HDJ2 protein	DNAJA1;DNAJ2;HDJ2;HSJ2;HSPF4	DnaJ homolog subfamily A member 1;HDJ2 protein (Fragment)	dnj-12	15.739	18	9	19	36.3	36.3	44.868	397
Tubulin alpha-1C chain;Tubulin alpha-6 chain;Alpha-tubulin 6;TUBA1C protein	TUBA1C;TUBA6	Tubulin alpha-1C chain;TUBA1C protein	tba-9	15.692	12	2	12	48.8	9.1	49.895	449
V-type proton ATPase subunit S1;Vacuolar proton pump subunit S1;V-ATPase S1 accessory protein;V-ATPase Ac45 subunit;Protein XAP-3;ATPase, H+ transporting, lysosomal accessory protein 1;Putative uncharacterized protein ATP6AP1	ATP6AP1;ATP6IP1;ATP6S1;VATPS1;XAP3;XX-FW83563B9.4-010	V-type proton ATPase subunit S1;ATPase, H+ transporting, lysosomal accessory protein 1;ATPase, H+ transporting, lysosomal accessory protein 1;14 kDa protein	no	15.532	3	3	5	8.3	8.3	52.025	470
Tubulin beta-2C chain;Tubulin beta-2 chain;Tubulin beta 2C;cDNA FLJ53341, highly similar to Tubulin beta-4 chain	TUBB2C	Tubulin beta-2C chain;cDNA FLJ11352 fis, clone HEMBA1000020, highly similar to Tubulin beta-2C chain;cDNA FLJ53341, highly similar to Tubulin beta-4 chain	tbb-4	15.089	15	2	15	64.9	3.6	49.83	445
Desmoglein-2;HDGC	DSG2;CDHF5	Desmoglein-2	no	14.512	5	5	8	8.3	8.3	122.29	1118
Heat shock 70 kDa protein 13;Stress 70 protein chaperone microsome-associated 60 kDa protein;Microsomal stress 70 protein ATPase core	HSPA13;STCH	Heat shock 70 kDa protein 13	stc-1	14.369	4	2	4	6.2	6.2	51.927	471
Tubulin beta-2B chain;Tubulin beta-2A chain	TUBB2B;TUBB2A;TUBB2	Tubulin beta-2B chain;Tubulin beta-2A chain	mec-7 (rep)	13.136	5	3	6	66.3	13.3	49.953	445
Transcription factor RelB	RELB	Transcription factor RelB	no	13.084	2	1	2	1.6	1.6	62.134	579
Transmembrane protein 59;Liver membrane-bound protein;Transmembrane protein 59, isoform CRA_a	TMEM59;RP4-758J24.2-008;C1orf8;HSPC001;UNQ169/PRO195;RP4-758J24.2-002;hCG_33694;RP4-758J24.2-006	Transmembrane protein 59;Transmembrane protein 59;Transmembrane protein 59;Transmembrane protein 59	no	12.927	2	2	4	11.1	11.1	37.409	334
MHC class I antigen;HLA class I histocompatibility antigen, A-2 alpha chain;MHC class I antigen A*2;Major histocompatibility complex, class I, A;HLA class I histocompatibility antigen, A-69 alpha chain;MHC class I antigen A*69;Aw-69;A-28;Leucocyte antigen A;HLA class I histocompatibility antigen, A-68 alpha chain;MHC class I antigen A*68;Aw-68	HLA-A;HLAA;DADB-123D8.3-003	Major histocompatibility complex, class I, A;Major histocompatibility complex, class I, A;HLA class I histocompatibility antigen, A-2 alpha chain;MHC class I HLA-A;Major histocompatibility complex, class I, A;HLA class I histocompatibility antigen, A-69 al	no	12.69	17	5	27	48.5	16.7	41.449	371
Zinc finger protein 470;Chondrogenesis zinc finger protein 1	ZNF470;CZF1	Isoform 2 of Zinc finger protein 470	no	12.632	2	1	2	2.3	2.3	68.585	599
DnaJ homolog subfamily A member 2;HIRA-interacting protein 4;Cell cycle progression restoration gene 3 protein;Dnj3;Renal carcinoma antigen NY-REN-14	DNAJA2;CPR3;HIRIP4	DnaJ homolog subfamily A member 2	dnj-19/T05C3.5	12.521	5	5	9	19.4	19.4	45.745	412
ADP/ATP translocase 3;Adenine nucleotide translocator 2;ANT 3;ADP,ATP carrier protein 3;Solute carrier family 25 member 6;ADP,ATP carrier protein, isoform T2	SLC25A6;ANT3;CDABP0051	ADP/ATP translocase 3;17 kDa protein	K01H12.2 (rep)	12.392	2	1	2	17.4	4.4	32.866	298
Dynein, light chain, roadblock-type 1;cDNA FLJ59194, moderately similar to Dynein light chain 2A, cytoplasmic;Dynein light chain roadblock-type 1;Dynein light chain 2A, cytoplasmic;Dynein-associated protein Km23;Roadblock domain-containing protein 1;Bithoraxoid-like protein	DYNLRB1;RP5-914B9.1-004;BITH;DNCL2A;DNLC2A;ROBLD1;HSPC162	Dynein, light chain, roadblock-type 1;cDNA FLJ59194, moderately similar to Dynein light chain 2A, cytoplasmic;Isoform 1 of Dynein light chain roadblock-type 1	dyrb-1	12.213	4	2	4	25	25	16.253	148
Tricarboxylate transport protein, mitochondrial;Citrate transport protein;Tricarboxylate carrier protein;Solute carrier family 25 member 1;cDNA FLJ60026, highly similar to Tricarboxylate transport protein, mitochondrial;Solute carrier family 25 (Mitochondrial carrier; citrate transporter), member 1, isoform CRA_b	SLC25A1;SLC20A3;hCG_17246	Tricarboxylate transport protein, mitochondrial;cDNA FLJ60026, highly similar to Tricarboxylate transport protein, mitochondrial (Solute carrier family 25 (Mitochondrial carrier	K11H3.3	11.92	8	5	9	18.6	18.6	34.012	311
RuvB-like 2;48 kDa TATA box-binding protein-interacting protein;TIP49b;Repressing pontin 52;51 kDa erythrocyte cytosolic protein;TIP60-associated protein 54-beta;INO80 complex subunit J	RUVBL2;INO80J;TIP48;TIP49B;CGI-46	RuvB-like 2	ruvb-2	11.859	62	28	64	62.9	62.9	51.156	463
VIP36-like protein;Lectin mannose-binding 2-like	LMAN2L;VIPL;PSEC0028;UNQ368/PRO704	Isoform 2 of VIP36-like protein;Isoform 1 of VIP36-like protein	ile-2 (rep)	10.887	8	5	10	20.3	20.3	40.982	359
ATP synthase subunit gamma, mitochondrial;F-ATPase gamma subunit	ATP5C1;ATP5C;ATP5CL1	Isoform Liver of ATP synthase subunit gamma, mitochondrial;Isoform Heart of ATP synthase subunit gamma, mitochondrial	Y69A2AR.18	10.268	4	3	6	10.7	10.7	32.996	298
Occludin;Tight junction protein occludin TM4 minus	OCLN	Occludin;Tight junction protein occludin TM4 minus;Similar to Occludin	no	10.163	13	7	14	21.5	21.5	59.143	522
NADH dehydrogenase [ubiquinone] 1 alpha subcomplex subunit 4;NADH-ubiquinone oxidoreductase MLRQ subunit;Complex I-MLRQ	NDUFA4	NADH dehydrogenase [ubiquinone] 1 alpha subcomplex subunit 4	no	9.8774	6	3	6	37	37	9.3697	81
Type-1 angiotensin II receptor-associated protein;AT1 receptor-associated protein	AGTRAP;ATRAP	Isoform 1 of Type-1 angiotensin II receptor-associated protein;Isoform 2 of Type-1 angiotensin II receptor-associated protein	no	9.3586	6	2	6	24.5	24.5	17.419	159
E3 ubiquitin-protein ligase RNF138;RING finger protein 138;Nemo-like kinase-associated RING finger protein	RNF138;NARF;HSD4;HSD-4	Isoform 1 of E3 ubiquitin-protein ligase RNF138	no	8.7317	5	3	5	24.9	24.9	28.192	245
Mitochondrial import inner membrane translocase subunit TIM50	TIMM50;TIM50;PRO1512	Isoform 2 of Mitochondrial import inner membrane translocase subunit TIM50;Isoform 1 of Mitochondrial import inner membrane translocase subunit TIM50	scpl-4	8.5912	5	3	5	9.6	9.6	50.464	456
Transmembrane emp24 domain-containing protein 10;21 kDa transmembrane-trafficking protein;Transmembrane protein Tmp21;Tmp-21-I;p24delta;S31III125;cDNA FLJ53754, highly similar to Transmembrane emp24 domain-containing protein 10	TMED10;TMP21	Transmembrane emp24 domain-containing protein 10;cDNA FLJ53754, highly similar to Transmembrane emp24 domain-containing protein 10	F47G9.1	8.4987	4	2	4	12.8	12.8	24.976	219
Cdc42 effector protein 1;Binder of Rho GTPases 5;Serum protein MSE55	CDC42EP1;BORG5;CEP1;MSE55	Isoform 1 of Cdc42 effector protein 1;Isoform 2 of Cdc42 effector protein 1	no	8.0413	5	4	5	19.9	19.9	40.294	391
Estradiol 17-beta-dehydrogenase 12;17-beta-hydroxysteroid dehydrogenase 12;3-ketoacyl-CoA reductase	HSD17B12	Estradiol 17-beta-dehydrogenase 12	let-767	7.7604	11	5	11	20.2	20.2	34.324	312
Alpha-1,6-mannosyl-glycoprotein 2-beta-N-acetylglucosaminyltransferase;Mannoside acetylglucosaminyltransferase 2;N-glycosyl-oligosaccharide-glycoprotein N-acetylglucosaminyltransferase II;Beta-1,2-N-acetylglucosaminyltransferase II;GlcNAc-T II	MGAT2	cDNA FLJ55952, highly similar to Alpha-1,6-mannosyl-glycoprotein2-beta-N- acetylglucosaminyltransferase	gly-20	7.4368	10	7	13	21.4	21.4	52.297	453
Signal peptidase complex subunit 3;Microsomal signal peptidase 23 kDa subunit;SPase 22 kDa subunit;SPC22/23	SPCS3;SPC22;UNQ1841/PRO3567	Signal peptidase complex subunit 3	K12H4.4	7.1864	2	1	2	6.7	6.7	20.313	180
78 kDa glucose-regulated protein;GRP 78;Heat shock 70 kDa protein 5;Immunoglobulin heavy chain-binding protein;Endoplasmic reticulum lumenal Ca(2+)-binding protein grp78	HSPA5;GRP78	HSPA5 protein	hsp-3/4	7.1818	27	15	27	31.1	29.5	72.421	655
Putative uncharacterized protein DKFZp686I15212;FLJ00385 protein;Putative uncharacterized protein DKFZp686N02209;Putative uncharacterized protein DKFZp686H20196;Putative uncharacterized protein DKFZp686O01196;IGH@ protein;Ig gamma-1 chain C region;Anti-RhD monoclonal T125 gamma1 heavy chain;Putative uncharacterized protein DKFZp686G11190;Putative uncharacterized protein DKFZp686K03196;cDNA FLJ783…	DKFZp686I15212;FLJ00385;DKFZp686N02209;DKFZp686H20196;DKFZp686O01196;IGH@;IGHG1;DKFZp686G11190;DKFZp686K03196;DKFZp686P15220;DKFZp686I15196;DKFZp686C15213;IGHM;IGHG2;IGHG4;IGHG3	Factor VII active site mutant immunoconjugate;IGHG1 protein;IGHG3 protein;Putative uncharacterized protein DKFZp686I15212;FLJ00385 protein (Fragment);Putative uncharacterized protein DKFZp686N02209;Putative uncharacterized protein DKFZp686H20196;Putative u	no	7.0816	2	1	2	1.5	1.5	75.552	679
Fatty acyl-CoA reductase 1;Male sterility domain-containing protein 2;cDNA: FLJ22728 fis, clone HSI15617	FAR1;MLSTD2;UNQ2423/PRO4981	Fatty acyl-CoA reductase 1;cDNA: FLJ22728 fis, clone HSI15617 (Fragment)	Y71H10A.2	6.8561	10	6	11	14.8	14.8	59.356	515
Isocitrate dehydrogenase [NADP], mitochondrial;Oxalosuccinate decarboxylase;NADP(+)-specific ICDH;IDP;ICD-M	IDH2	Isocitrate dehydrogenase [NADP], mitochondrial	idh-2	6.7933	9	6	14	15	15	50.909	452
Catenin beta-1;Beta-catenin;cDNA FLJ59565, highly similar to Beta-catenin	CTNNB1;CTNNB;OK/SW-cl.35;PRO2286	Isoform 1 of Catenin beta-1;85 kDa protein;cDNA FLJ59565, highly similar to Beta-catenin;46 kDa protein	hmp-2	6.1258	7	5	8	9.7	9.7	85.496	781
T-complex protein 1 subunit gamma;CCT-gamma;cDNA FLJ44436 fis, clone UTERU2019706, highly similar to T-complex protein 1 subunit gamma;cDNA FLJ57904, highly similar to T-complex protein 1 subunit gamma;Putative uncharacterized protein CCT3	CCT3;CCTG;TRIC5;RP11-443G18.6-002	T-complex protein 1 subunit gamma;chaperonin containing TCP1, subunit 3 isoform b;chaperonin containing TCP1, subunit 3 isoform c	cct-3	6.0581	5	3	5	11	11	60.533	545
Phosphatidylserine decarboxylase proenzyme;Phosphatidylserine decarboxylase alpha chain;Phosphatidylserine decarboxylase beta chain;Phosphatidylserine decarboxylase	PISD;RP5-858B16.2-004	Protein;Isoform 1 of Phosphatidylserine decarboxylase proenzyme;Phosphatidylserine decarboxylase;phosphatidylserine decarboxylase	psd-1 (B0361.5)	6.0248	4	3	5	6.2	6.2	65.359	579
Up-regulated during skeletal muscle growth protein 5;HCV F-transactivated protein 2	USMG5;HCVFTP2;PD04912	Up-regulated during skeletal muscle growth protein 5	no	5.7425	5	3	5	44.8	44.8	6.4575	58
Elongation factor 1-alpha 1;eEF1A-1;Elongation factor Tu;Leukocyte receptor cluster member 7;Putative elongation factor 1-alpha-like 3;eEF1A-like 3;Eukaryotic translation elongation factor 1 alpha 1;Elongation factor 1-alpha 2;eEF1A-2;Statin S1	EEF1A1;EEF1A;EF1A;LENG7;EEF1AL3;RP11-505P4.2-003;EEF1A2;EEF1AL;STN	Elongation factor 1-alpha 1;Putative elongation factor 1-alpha-like 3;Elongation factor 1-alpha;Elongation factor 1-alpha 2	eft-3/R03G5.1	5.7044	28	11	29	31.2	31.2	50.14	462
Sideroflexin-4;Breast cancer resistance marker 1;cDNA FLJ37976 fis, clone CTONG2010148	SFXN4;BCRM1	Isoform 1 of Sideroflexin-4;Isoform 2 of Sideroflexin-4;cDNA FLJ37976 fis, clone CTONG2010148	no	5.6098	4	3	5	9.5	9.5	37.998	337
Transcriptional repressor protein YY1;Yin and yang 1;Delta transcription factor;NF-E1;INO80 complex subunit S	YY1;INO80S	62 kDa protein;Transcriptional repressor protein YY1	no	5.5433	2	1	2	3.5	3.5	62.157	574
Calcium-binding mitochondrial carrier protein Aralar2;Mitochondrial aspartate glutamate carrier 2;Solute carrier family 25 member 13;Citrin	SLC25A13;ARALAR2	Solute carrier family 25, member 13 (Citrin), isoform CRA_a	K02F3.2	5.5265	7	4	8	8.6	8.6	74.303	676
Syntaxin 12;Syntaxin-12	STX12;RP3-426I6.4-002	Syntaxin 12;Syntaxin-12	syn-13	5.4854	2	1	2	5.7	5.7	34.201	299
4F2 cell-surface antigen heavy chain;Lymphocyte activation antigen 4F2 large subunit;4F2 heavy chain antigen	SLC3A2;MDU1	solute carrier family 3 (activators of dibasic and neutral amino acid transport), member 2 isoform a;solute carrier family 3 (activators of dibasic and neutral amino acid transport), member 2 isoform b;solute carrier family 3 (activators of dibasic and neu	atgp-2, atgp-1	5.3877	11	6	11	15.1	15.1	71.122	661
cDNA FLJ77398, highly similar to Homo sapiens UDP-glucose ceramide glucosyltransferase-like 1, transcript variant 2, mRNA;UDP-glucose:glycoprotein glucosyltransferase 1;UDP-glucose ceramide glucosyltransferase-like 1;UDP--Glc:glycoprotein glucosyltransferase;HUGT1	UGCGL1;GT;UGGT;UGT1;UGTR	UDP-glucose ceramide glucosyltransferase-like 1 isoform 1;UDP-glucose:glycoprotein glucosyltransferase 1	F48E3.3	5.3632	10	7	12	7.5	7.5	177.19	1555
N-acetyllactosaminide beta-1,3-N-acetylglucosaminyltransferase;Poly-N-acetyllactosamine extension enzyme;I-beta-1,3-N-acetylglucosaminyltransferase;UDP-GlcNAc:betaGal beta-1,3-N-acetylglucosaminyltransferase 1	B3GNT1;B3GNT6	N-acetyllactosaminide beta-1,3-N-acetylglucosaminyltransferase	no	5.264	4	3	5	12.8	12.8	47.119	415
Dephospho-CoA kinase domain-containing protein	DCAKD	Isoform 1 of Dephospho-CoA kinase domain-containing protein;Isoform 2 of Dephospho-CoA kinase domain-containing protein	T05G5.5	5.2581	6	3	6	19.5	19.5	26.55	231
Makorin-2;RING finger protein 62	MKRN2;RNF62;HSPC070	Makorin-2	Y55F3AM.6	5.2419	4	2	4	6	6	46.94	416
Nuclear pore membrane glycoprotein 210	NUP210;KIAA0906;PSEC0245	Isoform 1 of Nuclear pore membrane glycoprotein 210;Isoform 2 of Nuclear pore membrane glycoprotein 210	npp-12	5.1424	3	2	3	1.8	1.8	205.11	1887
Transferrin receptor protein 1;T9;p90;Transferrin receptor protein 1, serum form	TFRC	Transferrin receptor protein 1	no	5.1327	20	10	20	17.4	17.4	84.87	760
Catenin alpha-1;Cadherin-associated protein;Alpha E-catenin;NY-REN-13 antigen	CTNNA1	Isoform 2 of Catenin alpha-1;Isoform 1 of Catenin alpha-1		4.7904	14	10	15	17.8	17.8	102.63	930
Glyceraldehyde-3-phosphate dehydrogenase;Glyceraldehyde 3-phosphate dehydrogenase	GAPDH;GAPD;CDABP0047;OK/SW-cl.12	39 kDa protein;Glyceraldehyde-3-phosphate dehydrogenase;32 kDa protein;Glyceraldehyde-3-phosphate dehydrogenase;Glyceraldehyde 3-phosphate dehydrogenase;cDNA FLJ58855, highly similar to Glyceraldehyde-3-phosphate dehydrogenase;>IPI:CON_00713814.2|SWISS-PRO		4.7686	3	2	3	10.8	10.8	38.791	362
Single-stranded DNA-binding protein, mitochondrial;PWP1-interacting protein 17	SSBP1;SSBP	Single-stranded DNA-binding protein, mitochondrial		4.7513	10	4	10	34.5	34.5	17.259	148
Acylglycerol kinase, mitochondrial;Multiple substrate lipid kinase	AGK;MULK	Isoform 1 of Acylglycerol kinase, mitochondrial		4.628	16	9	16	25.4	25.4	47.137	422
Dolichyl-diphosphooligosaccharide--protein glycosyltransferase subunit 1;Dolichyl-diphosphooligosaccharide--protein glycosyltransferase 67 kDa subunit;Ribophorin-1;Ribophorin I	RPN1	Dolichyl-diphosphooligosaccharide--protein glycosyltransferase 67 kDa subunit precursor		4.6029	19	10	21	24.8	24.8	72.777	646
60 kDa heat shock protein, mitochondrial;Heat shock protein 60;60 kDa chaperonin;Chaperonin 60;Mitochondrial matrix protein P1;P60 lymphocyte protein;HuCHA60	HSPD1;HSP60	60 kDa heat shock protein, mitochondrial		4.3631	41	19	44	42.9	42.9	61.054	573
T-complex protein 1 subunit alpha;CCT-alpha	CCT1;CCTA;TCP1	T-complex protein 1 subunit alpha;T-complex protein 1 isoform b		4.3327	12	8	12	21.4	21.4	60.343	556
Carboxypeptidase D;Metallocarboxypeptidase D;gp180	CPD	Carboxypeptidase D		4.2408	4	3	5	2.7	2.7	152.93	1380
Protein transport protein Sec23A;SEC23-related protein A;Protein transport protein Sec23B;SEC23-related protein B;Sec23 homolog B (S. cerevisiae)	SEC23A;SEC23B;RP11-379J5.1-001	Protein transport protein Sec23A;Protein transport protein Sec23B;Sec23 homolog B		4.2265	3	2	3	3.8	3.8	86.16	765
Replication factor C subunit 3;Activator 1 subunit 3;Replication factor C 38 kDa subunit;Activator 1 38 kDa subunit;Putative uncharacterized protein RFC3	RFC3	Replication factor C subunit 3;replication factor C 3 isoform 2		4.1698	2	1	2	6.2	6.2	40.556	356
Poly(RC)-binding protein 2 isoform b variant;Poly(rC)-binding protein 2;Alpha-CP2;cDNA FLJ77432, highly similar to Homo sapiens poly(rC) binding protein 2 (PCBP2), transcript variant 2, mRNA;Poly(RC) binding protein 2, isoform CRA_b;PCBP2 protein;Poly(RC) binding protein 2;Poly(RC) binding protein 2, isoform CRA_a;cDNA FLJ58476, highly similar to Poly(rC)-binding protein 2;cDNA FLJ54752, highly s…	PCBP2;hCG_2017557	poly(rC) binding protein 2 isoform a;Poly(rC)-binding protein 2;poly(rC) binding protein 2 isoform b;poly(rC) binding protein 2 isoform e;poly(rC) binding protein 2 isoform f;poly(rC) binding protein 2 isoform c;cDNA FLJ58339, highly similar to Poly(rC)-bi		3.9774	5	3	5	11.7	11.7	38.651	366
T-complex protein 1, delta subunit;T-complex protein 1 subunit delta;CCT-delta;Stimulator of TAR RNA-binding;Putative uncharacterized protein CCT4	CCT4;CCTD;SRB	T-complex protein 1, delta subunit;T-complex protein 1 subunit delta;Putative uncharacterized protein CCT4		3.9608	8	4	8	11.5	11.5	57.952	539
Catenin delta-1;p120 catenin;Cadherin-associated Src substrate;p120(cas);Putative uncharacterized protein DKFZp781O2021	CTNND1;KIAA0384;DKFZp781O2021	Isoform 1ABC of Catenin delta-1;Isoform 1AB of Catenin delta-1;catenin, delta 1 isoform 1B;Isoform 1BC of Catenin delta-1;Isoform 1B of Catenin delta-1;Isoform 1AC of Catenin delta-1;Putative uncharacterized protein DKFZp781O2021;Isoform 1A of Catenin delt		3.9511	2	1	2	1.2	1.2	108.24	969
T-complex protein 1 subunit eta;CCT-eta;HIV-1 Nef-interacting protein;cDNA FLJ54832, highly similar to T-complex protein 1 subunit eta;Putative uncharacterized protein CCT7	CCT7;CCTH;NIP7-1	T-complex protein 1 subunit eta;chaperonin containing TCP1, subunit 7 isoform b		3.9225	3	2	3	5.3	5.3	59.366	543
Heat shock 70 kDa protein 1;HSP70.1;HSP70-1/HSP70-2;cDNA FLJ54370, highly similar to Heat shock 70 kDa protein 1;cDNA FLJ54303, highly similar to Heat shock 70 kDa protein 1;cDNA FLJ54407, highly similar to Heat shock 70 kDa protein 1;cDNA FLJ38698 fis, clone KIDNE2002015, highly similar to HEAT SHOCK 70 kDa PROTEIN 1;cDNA FLJ53752, highly similar to Heat shock 70 kDa protein 1	HSPA1A;HSPA1;HSPA1B;DAAP-21F2.8-002;DADB-333F21.4-002;DAQB-147D11.2-002;XXbac-BCX40G17.4-002;XXbac-BPG254B15.2-002	Heat shock 70 kDa protein 1;cDNA FLJ54392, highly similar to Heat shock 70 kDa protein 1;cDNA FLJ54408, highly similar to Heat shock 70 kDa protein 1;cDNA FLJ54407, highly similar to Heat shock 70 kDa protein 1;cDNA FLJ54389, highly similar to Heat shock 7		3.892	23	5	23	31.2	11.1	70.051	641
40S ribosomal protein S27a;cDNA FLJ75516, highly similar to Xenopus tropicalis ubiquitin C, mRNA;UBC protein;Ubiquitin B;Ubiquitin B, isoform CRA_a;cDNA FLJ51326, highly similar to Homo sapiens ubiquitin B (UBB), mRNA;Ubiquitin C splice variant;60S ribosomal protein L40;CEP52;Ubiquitin;RPS27A protein;Ubiquitin C	RPS27A;UBA80;UBCEP1;UBC;UBB;hCG_1998947;UBA52;UBCEP2	ubiquitin and ribosomal protein S27a precursor;similar to ubiquitin;ubiquitin C;44 kDa protein;44 kDa protein;44 kDa protein;39 kDa protein;UBC protein;30 kDa protein;ubiquitin B precursor;25 kDa protein;21 kDa protein;21 kDa protein;19 kDa protein;19 kDa		3.8297	19	8	19	50.6	50.6	17.965	156
T-complex protein 1 subunit zeta;CCT-zeta;CCT-zeta-1;Tcp20;HTR3;Acute morphine dependence-related protein 2;Putative uncharacterized protein CCT6A	CCT6A;CCT6;CCTZ	T-complex protein 1 subunit zeta;chaperonin containing TCP1, subunit 6A isoform b		3.7744	6	3	6	9.2	9.2	58.024	531
FK506-binding protein 10;Peptidyl-prolyl cis-trans isomerase;Immunophilin FKBP65;65 kDa FK506-binding protein;FKBP65;cDNA FLJ53423, highly similar to FK506-binding protein 10 (EC 5.2.1.8);cDNA FLJ35389 fis, clone SKNMC2000635, moderately similar to 65 kDa FK506-BINDING PROTEIN (EC 5.2.1.8);cDNA: FLJ22221 fis, clone HRC01651	FKBP10;FKBP65;PSEC0056	FK506-binding protein 10;cDNA FLJ53423, highly similar to FK506-binding protein 10;cDNA FLJ35389 fis, clone SKNMC2000635, moderately similar to 65 kDa FK506-BINDING PROTEIN;cDNA: FLJ22221 fis, clone HRC01651		3.7373	7	4	7	7	7	64.244	582
Apoptosis-inducing factor 1, mitochondrial;Programmed cell death protein 8;Apoptosis-inducing factor short isoform 3	AIFM1;AIF;PDCD8	Isoform 1 of Apoptosis-inducing factor 1, mitochondrial;Isoform 3 of Apoptosis-inducing factor 1, mitochondrial;programmed cell death 8 isoform 5		3.7334	7	4	7	10.6	10.6	66.9	613
Heat shock cognate 71 kDa protein;Heat shock 70 kDa protein 8;cDNA FLJ59163, highly similar to Heat shock cognate 71 kDa protein	HSPA8;HSC70;HSP73;HSPA10	Isoform 1 of Heat shock cognate 71 kDa protein;Isoform 2 of Heat shock cognate 71 kDa protein;cDNA FLJ59163, highly similar to Heat shock cognate 71 kDa protein		3.7103	45	16	46	37	31.9	70.897	646
NADH dehydrogenase [ubiquinone] iron-sulfur protein 2, mitochondrial;NADH-ubiquinone oxidoreductase 49 kDa subunit;Complex I-49kD	NDUFS2	NADH dehydrogenase [ubiquinone] iron-sulfur protein 2, mitochondrial		3.7098	2	1	2	3.9	3.9	52.545	463
Exosome complex exonuclease RRP44;Ribosomal RNA-processing protein 44;Protein DIS3 homolog	DIS3;KIAA1008;RRP44	Isoform 1 of Exosome complex exonuclease RRP44;Isoform 2 of Exosome complex exonuclease RRP44		3.7047	4	3	4	4.6	4.6	109	958
Insulin receptor substrate 4;160 kDa phosphotyrosine protein;PY160	IRS4	Insulin receptor substrate 4		3.6769	31	18	31	19.8	19.8	133.77	1257
24-dehydrocholesterol reductase;3-beta-hydroxysterol delta-24-reductase;Seladin-1;Diminuto/dwarf1 homolog	DHCR24;KIAA0018	24-dehydrocholesterol reductase;Protein		3.6328	2	1	2	2.5	2.5	60.101	516
ATP synthase subunit alpha, mitochondrial;ATP synthase subunit alpha;cDNA FLJ54625, highly similar to ATP synthase subunit alpha, mitochondrial (EC 3.6.3.14)	ATP5A1;ATP5A;ATP5AL2;ATPM	ATP synthase subunit alpha, mitochondrial;cDNA FLJ54107, highly similar to ATP synthase subunit alpha, mitochondrial;23 kDa protein;18 kDa protein;cDNA FLJ54625, highly similar to ATP synthase subunit alpha, mitochondrial		3.6302	7	4	7	9.2	9.2	59.75	553
Heat shock protein HSP 90-beta;HSP 84	HSP90AB1;HSP90B;HSPC2;HSPCB	Heat shock protein HSP 90-beta		3.5952	20	4	20	18.6	7.7	83.263	724
T-complex protein 1 subunit beta;CCT-beta	CCT2;99D8.1;CCTB	T-complex protein 1 subunit beta;14 kDa protein		3.5645	12	7	12	19.8	19.8	57.488	535
Mitochondrial ribonuclease P protein 3	KIAA0391;MRPP3	Isoform 1 of Mitochondrial ribonuclease P protein 3;Isoform 4 of Mitochondrial ribonuclease P protein 3;Isoform 2 of Mitochondrial ribonuclease P protein 3		3.4806	6	5	9	14.2	14.2	67.315	583
Mitochondrial dicarboxylate carrier;Solute carrier family 25 member 10	SLC25A10;DIC	Isoform 2 of Mitochondrial dicarboxylate carrier;Isoform 1 of Mitochondrial dicarboxylate carrier;25 kDa protein		3.3526	4	3	5	11.8	11.8	32.145	296
Pre-mRNA branch site protein p14;SF3B 14 kDa subunit	SF3B14;CGI-110;HSPC175;HT006	Pre-mRNA branch site protein p14		3.1545	3	2	3	18.4	18.4	14.585	125
NADH dehydrogenase [ubiquinone] iron-sulfur protein 7, mitochondrial;NADH-ubiquinone oxidoreductase 20 kDa subunit;Complex I-20kD;PSST subunit;My017 protein;cDNA FLJ34850 fis, clone NT2NE2011758, highly similar to NADH-UBIQUINONE OXIDOREDUCTASE 20 kDa SUBUNIT (EC 1.6.5.3);Putative uncharacterized protein NDUFS7;cDNA FLJ78321;cDNA FLJ46880 fis, clone UTERU3015299, highly similar to NADH-ubiquinone…	NDUFS7	NADH dehydrogenase [ubiquinone] iron-sulfur protein 7, mitochondrial;My017 protein;Putative uncharacterized protein NDUFS7;cDNA FLJ78321;cDNA FLJ46880 fis, clone UTERU3015299, highly similar to NADH-ubiquinone oxidoreductase 20 kDa subunit, mitochondrial;c		3.091	4	2	4	7.7	7.7	32.833	298
NADH dehydrogenase [ubiquinone] 1 beta subcomplex subunit 11, mitochondrial;NADH-ubiquinone oxidoreductase ESSS subunit;Complex I-ESSS;Neuronal protein 17.3	NDUFB11;UNQ111/PRO1064	Isoform 2 of NADH dehydrogenase [ubiquinone] 1 beta subcomplex subunit 11, mitochondrial;Neuronal protein		3.0742	2	1	2	14.1	14.1	18.364	163
cDNA FLJ56382, highly similar to WD repeat protein 6;WD repeat-containing protein 6;cDNA FLJ56107, highly similar to WD repeat protein 6	WDR6	WD repeat domain 6 protein;WD repeat-containing protein 6;cDNA FLJ56107, highly similar to WD repeat protein 6		2.9388	5	3	5	6.6	6.6	125	1151
Trifunctional enzyme subunit alpha, mitochondrial;TP-alpha;78 kDa gastrin-binding protein;Long-chain enoyl-CoA hydratase;Long chain 3-hydroxyacyl-CoA dehydrogenase	HADHA;HADH	Trifunctional enzyme subunit alpha, mitochondrial		2.919	8	6	8	15.1	15.1	82.999	763
Eukaryotic initiation factor 4A-II;ATP-dependent RNA helicase eIF4A-2;Eukaryotic initiation factor 4A-I;ATP-dependent RNA helicase eIF4A-1;Eukaryotic initiation factor 4A-III;Eukaryotic translation initiation factor 4A isoform 3;ATP-dependent RNA helicase eIF4A-3;ATP-dependent RNA helicase DDX48;DEAD box protein 48;Eukaryotic initiation factor 4A-like NUK-34;Nuclear matrix protein 265;EIF4A2 prot…	EIF4A2;DDX2B;EIF4F;EIF4A1;DDX2A;EIF4A;EIF4A3;DDX48;KIAA0111;hCG_1784041;DKFZp566L241	Isoform 2 of Eukaryotic initiation factor 4A-II;Isoform 1 of Eukaryotic initiation factor 4A-II;Eukaryotic initiation factor 4A-I;46 kDa protein;Eukaryotic initiation factor 4A-III;Eukaryotic translation initiation factor 4A, isoform 2, isoform CRA_b;26 kD		2.9066	3	2	3	6.4	6.4	46.489	408
NADH dehydrogenase [ubiquinone] 1 beta subcomplex subunit 4;NADH-ubiquinone oxidoreductase B15 subunit;Complex I-B15;NADH dehydrogenase (Ubiquinone) 1 beta subcomplex, 4, 15kDa	NDUFB4	NADH dehydrogenase [ubiquinone] 1 beta subcomplex subunit 4;NADH dehydrogenase (Ubiquinone) 1 beta subcomplex, 4, 15kDa		2.8916	2	2	3	12.4	12.4	15.208	129
Ribose-phosphate pyrophosphokinase 1;Phosphoribosyl pyrophosphate synthetase I;PPRibP;Ribose-phosphate pyrophosphokinase;Phosphoribosyl pyrophosphate synthetase 1	PRPS1;RP11-540N4.1-003	Ribose-phosphate pyrophosphokinase 1;Ribose-phosphate pyrophosphokinase (Fragment);Phosphoribosyl pyrophosphate synthetase 1		2.7948	19	4	19	34	15.1	34.834	318
ATP synthase subunit e, mitochondrial	ATP5I;ATP5K	ATP synthase, H+ transporting, mitochondrial F0 complex, subunit E		2.7583	2	1	2	19.4	19.4	8.3076	72
Transmembrane protein 33;Protein DB83	TMEM33;DB83	Transmembrane protein 33		2.722	2	1	2	4.9	4.9	27.978	247
Fatty acid synthase;[Acyl-carrier-protein] S-acetyltransferase;[Acyl-carrier-protein] S-malonyltransferase;3-oxoacyl-[acyl-carrier-protein] synthase;3-oxoacyl-[acyl-carrier-protein] reductase;3-hydroxypalmitoyl-[acyl-carrier-protein] dehydratase;Enoyl-[acyl-carrier-protein] reductase;Oleoyl-[acyl-carrier-protein] hydrolase	FASN;FAS	Fatty acid synthase		2.6428	10	7	10	5.5	5.5	273.4	2511
cDNA FLJ55634, highly similar to Autophagy-related protein 9A;Autophagy-related protein 9A;APG9-like 1	APG9L1;ATG9A;hCG_15583	APG9 autophagy 9-like 1;Isoform 1 of Autophagy-related protein 9A;Isoform 2 of Autophagy-related protein 9A;Isoform 3 of Autophagy-related protein 9A		2.6274	20	10	20	17.9	17.9	94.446	839
Aspartyl-tRNA synthetase, cytoplasmic;Aspartate--tRNA ligase;Cell proliferation-inducing gene 40 protein;Putative uncharacterized protein DARS	DARS;PIG40	Aspartyl-tRNA synthetase, cytoplasmic;Putative uncharacterized protein DARS (Fragment);21 kDa protein;20 kDa protein		2.5445	8	5	8	13	13	57.136	501
60S acidic ribosomal protein P0;L10E;RPLP0 protein;cDNA FLJ51469, highly similar to 60S acidic ribosomal protein P0;60S acidic ribosomal protein P0-like	RPLP0	60S acidic ribosomal protein P0;60S acidic ribosomal protein P0;cDNA FLJ51469, highly similar to 60S acidic ribosomal protein P0;60S acidic ribosomal protein P0-like;24 kDa protein;60S acidic ribosomal protein P0;19 kDa protein;18 kDa protein;17 kDa protei		2.4873	31	14	31	55.8	55.8	34.273	317
Cytochrome c oxidase subunit 5A, mitochondrial;Cytochrome c oxidase polypeptide Va	COX5A	Cytochrome c oxidase subunit 5A, mitochondrial		2.4617	2	1	2	11.3	11.3	16.762	150
45 kDa calcium-binding protein;Cab45;Stromal cell-derived factor 4;Stromal cell derived factor 4;Stromal cell derived factor 4, isoform CRA_b	SDF4;CAB45;PSEC0034;RP5-902P8.6-007;hCG_19193	45 kDa calcium-binding protein;stromal cell derived factor 4 precursor		2.4495	2	2	2	11	11	41.806	362
T-complex protein 1 subunit epsilon;CCT-epsilon;cDNA FLJ54333, highly similar to T-complex protein 1 subunit epsilon;cDNA FLJ59103, highly similar to T-complex protein 1 subunit epsilon	CCT5;CCTE;KIAA0098	T-complex protein 1 subunit epsilon;cDNA FLJ54333, highly similar to T-complex protein 1 subunit epsilon;cDNA FLJ59103, highly similar to T-complex protein 1 subunit epsilon		2.4451	17	8	17	21.8	21.8	59.67	541
Membrane magnesium transporter 1;Transmembrane protein 32	MMGT1;TMEM32	cDNA FLJ54627, highly similar to Homo sapiens transmembrane protein 32 (TMEM32), mRNA		2.4375	2	1	2	12.2	12.2	21.881	196
T-complex protein 1 subunit theta;CCT-theta;Renal carcinoma antigen NY-REN-15	CCT8;CCTQ;KIAA0002	T-complex protein 1 subunit theta;59 kDa protein;Protein		2.4372	14	8	15	17.2	17.2	59.62	548
Protein disulfide-isomerase;Prolyl 4-hydroxylase subunit beta;Cellular thyroid hormone-binding protein;p55;Procollagen-proline, 2-oxoglutarate 4-dioxygenase (Proline 4-hydroxylase), beta polypeptide, isoform CRA_b;cDNA FLJ38619 fis, clone HEART2007696, highly similar to Protein disulfide-isomerase (EC 5.3.4.1);cDNA FLJ45462 fis, clone BRSTN2011961, highly similar to Protein disulfide-isomerase (E…	P4HB;ERBA2L;PDI;PDIA1;PO4DB;hCG_95895	Protein disulfide-isomerase;cDNA FLJ59430, highly similar to Protein disulfide-isomerase;Protein		2.4027	2	1	2	3.9	3.9	57.116	508
Translocon-associated protein subunit delta;Signal sequence receptor subunit delta;Putative uncharacterized protein SSR4	SSR4;TRAPD	Translocon-associated protein subunit delta precursor;Putative uncharacterized protein SSR4;Protein		2.3883	5	3	5	22.3	22.3	20.213	184
ATP synthase subunit beta, mitochondrial	ATP5B;ATPMB;ATPSB	ATP synthase subunit beta, mitochondrial		2.3318	18	10	18	28.5	28.5	56.559	529
Squamous cell carcinoma antigen recognized by T-cells 3;Tat-interacting protein of 110 kDa;cDNA FLJ51777, highly similar to Squamous cell carcinoma antigen recognized byT-cells 3	SART3;KIAA0156;TIP110	Isoform 1 of Squamous cell carcinoma antigen recognized by T-cells 3;cDNA FLJ51777, highly similar to Squamous cell carcinoma antigen recognized byT-cells 3;14 kDa protein;7 kDa protein		2.3101	2	2	2	3.6	3.6	109.93	963
BAG family molecular chaperone regulator 2;Bcl-2-associated athanogene 2;BCL2-associated athanogene 2	BAG2;RP3-496N17.2-002	BAG family molecular chaperone regulator 2;BCL2-associated athanogene 2		2.2336	2	1	2	10	10	23.772	211
Protein disulfide-isomerase A6;Protein disulfide isomerase P5;Thioredoxin domain-containing protein 7	PDIA6;TXNDC7	Isoform 2 of Protein disulfide-isomerase A6;Isoform 1 of Protein disulfide-isomerase A6		2.2298	3	4	6	11.8	11.8	53.9	492
Heterogeneous nuclear ribonucleoprotein L;cDNA FLJ75895, highly similar to Homo sapiens heterogeneous nuclear ribonucleoprotein L (HNRPL), transcript variant 2, mRNA;Putative uncharacterized protein HNRNPL	HNRNPL;HNRPL;P/OKcl.14	Heterogeneous nuclear ribonucleoprotein L;heterogeneous nuclear ribonucleoprotein L isoform b;Similar to Delta(3,5)-Delta(2,4)-dienoyl-CoA isomerase, mitochondrial precursor;19 kDa protein		2.2079	12	7	12	18.8	18.8	64.132	589
Heat shock protein HSP 90-alpha;HSP 86;Renal carcinoma antigen NY-REN-38;Hsp89-alpha-delta-N;Putative heat shock protein HSP 90-beta-3;Heat shock protein 90-beta c	HSP90AA1;HSP90A;HSPC1;HSPCA;HSP90AB3P;HSP90BC	heat shock protein 90kDa alpha (cytosolic), class A member 1 isoform 1;Isoform 1 of Heat shock protein HSP 90-alpha;Hsp89-alpha-delta-N;Putative heat shock protein HSP 90-beta-3		2.2042	2	1	2	9.6	1.8	98.16	854
Endoplasmic reticulum resident protein ERp44;Thioredoxin domain-containing protein 4	ERP44;KIAA0573;TXNDC4;UNQ532/PRO1075	Thioredoxin domain-containing protein 4		2.1278	2	1	2	3.4	3.4	46.971	406
Serine/threonine-protein phosphatase 2A 65 kDa regulatory subunit A alpha isoform;PP2A, subunit A, PR65-alpha isoform;PP2A, subunit A, R1-alpha isoform;Medium tumor antigen-associated 61 kDa protein;cDNA FLJ56133, highly similar to Serine/threonine-protein phosphatase 2A 65 kDa regulatory subunit A alpha isoform;cDNA FLJ56053, highly similar to Serine/threonine-protein phosphatase 2A 65 kDa regul…	PPP2R1A	Serine/threonine-protein phosphatase 2A 65 kDa regulatory subunit A alpha isoform;cDNA FLJ56133, highly similar to Serine/threonine-protein phosphatase 2A 65 kDa regulatory subunit A alpha isoform;cDNA FLJ56053, highly similar to Serine/threonine-protein p		2.1216	2	1	2	3.4	3.4	65.308	589
Phosphoribosyl pyrophosphate synthetase-associated protein 1;39 kDa phosphoribosypyrophosphate synthetase-associated protein	PRPSAP1	phosphoribosyl pyrophosphate synthetase-associated protein 1;Phosphoribosyl pyrophosphate synthetase-associated protein 1		2.1035	2	1	2	5.7	5.7	42.467	385
Endoplasmin;Heat shock protein 90 kDa beta member 1;94 kDa glucose-regulated protein;gp96 homolog;Tumor rejection antigen 1;cDNA FLJ58626, highly similar to Endoplasmin (Heat shock protein 90 kDa beta member 1)	HSP90B1;TRA1	Endoplasmin;cDNA FLJ58626, highly similar to Endoplasmin		2.0911	5	3	5	6.8	5.4	92.468	803
cDNA FLJ75174, highly similar to Homo sapiens calmodulin 1 (phosphorylase kinase, delta), mRNA;Calmodulin;cDNA, FLJ96792, highly similar to Homo sapiens calmodulin 2 (phosphorylase kinase, delta) (CALM2), mRNA;CALM3 protein	CALM1;CALM;CAM;CAM1;CALM2;CAM2;CAMB;CALM3;CALML2;CAM3;CAMC;CAMIII	cDNA FLJ75174, highly similar to Homo sapiens calmodulin 1 (phosphorylase kinase, delta), mRNA;Calmodulin;cDNA, FLJ96792, highly similar to Homo sapiens calmodulin 2 (phosphorylase kinase, delta) (CALM2), mRNA;CALM3 protein;22 kDa protein;7 kDa protein		2.0593	9	4	9	37.5	37.5	17.163	152
Transitional endoplasmic reticulum ATPase;15S Mg(2+)-ATPase p97 subunit;Valosin-containing protein	VCP	Transitional endoplasmic reticulum ATPase		2.0326	56	27	56	45.5	45.5	89.321	806
DNA-directed RNA polymerase II subunit RPB2;DNA-directed RNA polymerase II subunit B;RNA polymerase II subunit B2;RNA polymerase II subunit 2;DNA-directed RNA polymerase II 140 kDa polypeptide	POLR2B	DNA-directed RNA polymerase II subunit RPB2		2.0253	2	1	2	1.1	1.1	133.9	1174
rRNA 2'-O-methyltransferase fibrillarin;34 kDa nucleolar scleroderma antigen	FBL;FIB1;FLRN	rRNA 2'-O-methyltransferase fibrillarin		2.0019	2	1	2	5.9	5.9	33.784	321
NF-kappa-B-repressing factor;Transcription factor NRF;ITBA4 protein	NKRF;ITBA4;NRF	NF-kappa-B-repressing factor		1.9508	2	1	2	1.6	1.6	77.672	690
A-kinase anchor protein 8;A-kinase anchor protein 95 kDa	AKAP8;AKAP95	A-kinase anchor protein 8		1.9463	3	2	3	6.4	6.4	76.107	692
CAD protein;Glutamine-dependent carbamoyl-phosphate synthase;Aspartate carbamoyltransferase;Dihydroorotase;Putative uncharacterized protein CAD	CAD	CAD protein;Putative uncharacterized protein CAD		1.9267	89	50	90	35.7	35.7	242.98	2225
cDNA, FLJ96923, highly similar to Homo sapiens ribophorin II (RPN2), mRNA;Dolichyl-diphosphooligosaccharide--protein glycosyltransferase subunit 2;Dolichyl-diphosphooligosaccharide--protein glycosyltransferase 63 kDa subunit;Ribophorin-2;Ribophorin II;RIBIIR;cDNA FLJ38924 fis, clone NT2NE2011896, highly similar to Dolichyl-diphosphooligosaccharide--protein glycosyltransferase 63 kDa subunit (EC 2…	RPN2;RP3-343K2.2-003;hCG_37142;RP3-343K2.2-002;RP3-343K2.2-007;RP3-343K2.2-006	cDNA, FLJ96923, highly similar to Homo sapiens ribophorin II (RPN2), mRNA;Dolichyl-diphosphooligosaccharide--protein glycosyltransferase subunit 2;ribophorin II isoform 2 precursor;Ribophorin II;Putative uncharacterized protein RPN2;Ribophorin II;Ribophori		1.9261	4	2	4	8.1	8.1	69.333	631
Activating molecule in BECN1-regulated autophagy protein 1	AMBRA1;KIAA1736	Isoform 5 of Activating molecule in BECN1-regulated autophagy protein 1;Isoform 1 of Activating molecule in BECN1-regulated autophagy protein 1;Isoform 3 of Activating molecule in BECN1-regulated autophagy protein 1;Isoform 2 of Activating molecule in BECN		1.9119	2	1	2	1.6	1.6	142.58	1301
28S ribosomal protein S7, mitochondrial;MRP-S7;bMRP-27a	MRPS7	28S ribosomal protein S7, mitochondrial		1.8902	4	2	4	15.3	15.3	28.162	242
ATP-dependent RNA helicase DDX1;DEAD box protein 1;DEAD box protein retinoblastoma	DDX1	ATP-dependent RNA helicase DDX1		1.878	19	10	19	22.6	22.6	82.431	740
cDNA FLJ78628;Uncharacterized protein KIAA1712;HBV PreS1-transactivated protein 3	KIAA1712;hCG_40007	cDNA FLJ78628;Uncharacterized protein KIAA1712		1.8398	5	3	5	12.5	12.5	44.719	399
28S ribosomal protein S27, mitochondrial;MRP-S27	MRPS27;KIAA0264	cDNA FLJ54536, highly similar to Mitochondrial 28S ribosomal protein S27		1.8248	5	3	5	12.1	12.1	49.149	428
Protein NipSnap homolog 2;Glioblastoma-amplified sequence	GBAS;NIPSNAP2	Protein NipSnap homolog 2		1.8177	10	5	10	30.8	28.7	33.742	286
52 kDa Ro protein;Sjoegren syndrome type A antigen;Ro(SS-A);52 kDa ribonucleoprotein autoantigen Ro/SS-A;Tripartite motif-containing protein 21;RING finger protein 81	TRIM21;RNF81;RO52;SSA1	52 kDa Ro protein		1.8102	41	18	41	38.5	38.5	54.169	475
Heterogeneous nuclear ribonucleoprotein H2;Heterogeneous nuclear ribonucleoprotein H';FTP-3;cDNA FLJ57964, highly similar to Heterogeneous nuclear ribonucleoprotein H'	HNRNPH2;FTP3;HNRPH2	Heterogeneous nuclear ribonucleoprotein H2;cDNA FLJ57964, highly similar to Heterogeneous nuclear ribonucleoprotein H'		1.808	4	2	4	22.3	7.1	49.263	449
UPF0027 protein C22orf28;cDNA FLJ58027;cDNA FLJ57752	C22orf28;HSPC117	UPF0027 protein C22orf28;cDNA FLJ58027;cDNA FLJ57752		1.807	11	6	11	17	17	55.21	505
Acyl carrier protein, mitochondrial;NADH-ubiquinone oxidoreductase 9.6 kDa subunit;CI-SDAP	NDUFAB1	Acyl carrier protein, mitochondrial		1.7692	2	1	2	12.2	12.2	17.417	156
Protein-L-isoaspartate(D-aspartate) O-methyltransferase;Protein-beta-aspartate methyltransferase;Protein L-isoaspartyl/D-aspartyl methyltransferase;L-isoaspartyl protein carboxyl methyltransferase	PCMT1	Isoform 2 of Protein-L-isoaspartate(D-aspartate) O-methyltransferase;Isoform 1 of Protein-L-isoaspartate(D-aspartate) O-methyltransferase		1.7597	14	7	15	55.3	55.3	24.693	228
Coatomer subunit epsilon;Epsilon-coat protein;Coatomer protein complex, subunit epsilon, isoform CRA_b;Putative uncharacterized protein COPE;cDNA FLJ44512 fis, clone UTERU3001988, highly similar to Homo sapiens coatomer protein complex, subunit epsilon (COPE), transcript variant 2, mRNA;Coatomer protein complex, subunit epsilon, isoform CRA_e	COPE	Coatomer subunit epsilon;epsilon subunit of coatomer protein complex isoform b;epsilon subunit of coatomer protein complex isoform c		1.7589	2	1	2	6.5	6.5	34.482	308
Adenosylhomocysteinase;S-adenosyl-L-homocysteine hydrolase	AHCY;SAHH	Adenosylhomocysteinase		1.7588	2	2	2	5.8	5.8	47.716	432
Uncharacterized protein C21orf70	C21orf70;PRED56	Isoform A of Uncharacterized protein C21orf70;Isoform B of Uncharacterized protein C21orf70		1.7538	2	1	2	4.8	4.8	25.456	230
DnaJ homolog subfamily A member 3, mitochondrial;Tumorous imaginal discs protein Tid56 homolog;DnaJ protein Tid-1;Hepatocellular carcinoma-associated antigen 57;cDNA FLJ55843, highly similar to DnaJ homolog subfamily A member 3, mitochondrial	DNAJA3;HCA57;TID1	Isoform 1 of DnaJ homolog subfamily A member 3, mitochondrial;Isoform 2 of DnaJ homolog subfamily A member 3, mitochondrial;cDNA FLJ55843, highly similar to DnaJ homolog subfamily A member 3, mitochondrial		1.7367	2	2	2	8.1	8.1	52.537	480
28S ribosomal protein S10, mitochondrial;MRP-S10	MRPS10;MSTP040	28S ribosomal protein S10, mitochondrial		1.7144	2	1	2	9	9	22.999	201
DNA damage-binding protein 1;Damage-specific DNA-binding protein 1;UV-damaged DNA-binding factor;DDB p127 subunit;DNA damage-binding protein a;UV-damaged DNA-binding protein 1;Xeroderma pigmentosum group E-complementing protein;XPE-binding factor;HBV X-associated protein 1;cDNA FLJ51067, highly similar to DNA damage-binding protein 1;cDNA FLJ51165, highly similar to DNA damage-binding protein 1	DDB1;XAP1	DNA damage-binding protein 1;cDNA FLJ51067, highly similar to DNA damage-binding protein 1;cDNA FLJ51165, highly similar to DNA damage-binding protein 1		1.712	32	17	33	19.9	19.9	126.97	1140
Transcription elongation factor B polypeptide 1;RNA polymerase II transcription factor SIII subunit C;SIII p15;Elongin 15 kDa subunit;Elongin-C	TCEB1	Transcription elongation factor B polypeptide 1;12 kDa protein;11 kDa protein;9 kDa protein		1.7109	6	3	6	41.1	41.1	12.473	112
DnaJ homolog subfamily C member 10;ER-resident protein ERdj5;Macrothioredoxin;cDNA FLJ55732, highly similar to Homo sapiens DnaJ (Hsp40) homolog, subfamily C, member 10 (DNAJC10), mRNA	DNAJC10;ERDJ5;UNQ495/PRO1012;hCG_22235	Isoform 1 of DnaJ homolog subfamily C member 10;Isoform 2 of DnaJ homolog subfamily C member 10;cDNA FLJ55732, highly similar to Homo sapiens DnaJ (Hsp40) homolog, subfamily C, member 10 (DNAJC10), mRNA		1.7075	4	2	4	3.4	3.4	91.079	793
Heterogeneous nuclear ribonucleoprotein H;Heterogeneous nuclear ribonucleoprotein H, N-terminally processed	HNRNPH1;HNRPH;HNRPH1	51 kDa protein;Heterogeneous nuclear ribonucleoprotein H		1.7061	30	7	31	39.2	24.8	51.229	472
Dolichyl-diphosphooligosaccharide--protein glycosyltransferase 48 kDa subunit;cDNA FLJ52929, highly similar to Dolichyl-diphosphooligosaccharide--proteinglycosyltransferase 48 kDa subunit (EC2.4.1.119)	DDOST;KIAA0115;OST48;OK/SW-cl.45	dolichyl-diphosphooligosaccharide-protein glycosyltransferase precursor;cDNA FLJ52929, highly similar to Dolichyl-diphosphooligosaccharide--proteinglycosyltransferase 48 kDa subunit		1.6915	2	2	2	8.3	8.3	50.8	456
Histone deacetylase 6;Putative uncharacterized protein HDAC6	HDAC6;KIAA0901;JM21	cDNA FLJ56474, highly similar to Histone deacetylase 6;cDNA FLJ14021 fis, clone HEMBA1002513, highly similar to Histone deacetylase 6 (Fragment)		1.6798	4	2	4	2.6	2.6	132.78	1229
14-3-3 protein epsilon	YWHAE	14-3-3 protein epsilon;22 kDa protein		1.6787	8	3	8	25.1	18	29.174	255
TRM112-like protein	AD-001;HSPC152;HSPC170	TRM112-like protein;similar to adrenal gland protein AD-001		1.6742	4	2	4	21.6	21.6	14.199	125
Protein NipSnap homolog 1	NIPSNAP1	Protein NipSnap homolog 1;Protein		1.6656	10	6	12	35.2	33.1	33.31	284
NADH dehydrogenase [ubiquinone] 1 alpha subcomplex subunit 8;NADH-ubiquinone oxidoreductase 19 kDa subunit;Complex I-19kD;Complex I-PGIV	NDUFA8	NADH dehydrogenase [ubiquinone] 1 alpha subcomplex subunit 8		1.6255	10	5	10	30.2	30.2	20.105	172
28S ribosomal protein S17, mitochondrial;MRP-S17	MRPS17;RPMS17;HSPC011	28S ribosomal protein S17, mitochondrial precursor		1.6214	2	1	2	12.9	12.9	25.72	225
60S ribosomal protein L23;Ribosomal protein L17;Similar to ribosomal protein L23	RPL23	60S ribosomal protein L23;Similar to ribosomal protein L23;13 kDa protein;12 kDa protein;10 kDa protein		1.6161	30	11	30	65	65	14.865	140
Probable ATP-dependent RNA helicase DDX6;DEAD box protein 6;ATP-dependent RNA helicase p54;Oncogene RCK	DDX6;HLR2;RCK	Probable ATP-dependent RNA helicase DDX6		1.6109	18	9	18	29	29	54.416	483
28S ribosomal protein S18b, mitochondrial;MRP-S18-b;MRP-S18-2;Mitochondrial ribosomal protein S18B;Putative uncharacterized protein ENSP00000365691;Putative uncharacterized protein ENSP00000379750	MRPS18B;HSPC183;PTD017;DADB-129D20.6-003;DAMA-178G23.8-003;DAMC-83F13.5-003;DAQB-47P19.5-003;DASS-182C6.3-003;XXbac-BCX48F10.3-003;XXbac-BPG249D20.2-003	28S ribosomal protein S18b, mitochondrial;Putative uncharacterized protein MRPS18B;Putative uncharacterized protein MRPS18B;Mitochondrial ribosomal protein S18B, isoform CRA_b		1.6092	2	1	2	8.5	8.5	29.395	258
Flotillin-2;Epidermal surface antigen;FLOT2 protein	FLOT2;ESA1;M17S1	Flotillin-2;flotillin 2;43 kDa protein		1.607	2	1	2	2.9	2.9	53.137	483
Geranylgeranyl transferase type-2 subunit beta;Geranylgeranyl transferase type II subunit beta;Type II protein geranyl-geranyltransferase subunit beta;Rab geranylgeranyltransferase subunit beta;Rab geranyl-geranyltransferase subunit beta;Rab geranylgeranyltransferase, beta subunit variant;Rab geranylgeranyltransferase, beta subunit	RABGGTB;GGTB;RP4-682C21.3-012	Geranylgeranyl transferase type-2 subunit beta;Rab geranylgeranyltransferase, beta subunit variant (Fragment);Rab geranylgeranyltransferase, beta subunit		1.6026	6	3	6	10.6	10.6	36.924	331
Splicing factor 3B subunit 3;Spliceosome-associated protein 130;Pre-mRNA-splicing factor SF3b 130 kDa subunit;STAF130	SF3B3;KIAA0017;SAP130	Isoform 1 of Splicing factor 3B subunit 3		1.5898	5	4	5	5.3	5.3	135.58	1217
Interleukin enhancer-binding factor 3;Nuclear factor of activated T-cells 90 kDa;Double-stranded RNA-binding protein 76;Translational control protein 80;Nuclear factor associated with dsRNA;M-phase phosphoprotein 4	ILF3;DRBF;MPHOSPH4;NF90	interleukin enhancer binding factor 3 isoform d;Isoform 6 of Interleukin enhancer-binding factor 3		1.5833	2	1	2	41	5	95.807	898
General transcription factor II-I;Bruton tyrosine kinase-associated protein 135;SRF-Phox1-interacting protein;Williams-Beuren syndrome chromosomal region 6 protein	GTF2I;BAP135;WBSCR6	Isoform 1 of General transcription factor II-I;Isoform 3 of General transcription factor II-I;Isoform 4 of General transcription factor II-I;Isoform 2 of General transcription factor II-I		1.5798	4	3	4	3.1	3.1	112.42	998
cDNA FLJ56334, highly similar to SEC13-related protein;SEC13-like 1 isoform b variant;Protein SEC13 homolog;SEC13-related protein;SEC13-like protein 1;Putative uncharacterized protein SEC13	SEC13;D3S1231E;SEC13L1;SEC13R	cDNA FLJ56334, highly similar to SEC13-related protein;Protein SEC13 homolog;Protein SEC13 homolog;SEC13 protein isoform 2;SEC13-like 1 isoform b variant (Fragment);Putative uncharacterized protein SEC13;28 kDa protein;30 kDa protein		1.5741	33	11	35	54.1	54.1	40.746	368
Transcription elongation factor B polypeptide 2;RNA polymerase II transcription factor SIII subunit B;SIII p18;Elongin B;Elongin 18 kDa subunit	TCEB2	elongin B isoform b;Transcription elongation factor B polypeptide 2;13 kDa protein		1.5606	2	1	2	15.5	15.5	17.911	161
Mediator of DNA damage checkpoint protein 1;Nuclear factor with BRCT domains 1;Mediator of DNA damage checkpoint 1 variant 2;Mediator of DNA damage checkpoint 1;cDNA FLJ51572, moderately similar to Mediator of DNA damage checkpoint protein 1;Mediator of DNA damage checkpoint 1 variant 4;Mediator of DNA damage checkpoint 1 variant 1	MDC1;KIAA0170;NFBD1;DAAP-285E11.7-003;DADB-118P11.6-003;DAMA-26D6.4-003;DAMC-316D20.6-003;DAQB-47P19.7-003;DASS-191K16.1-003;XXbac-BCX111D4.1-003;XXbac-BPG252P9.3-003;DAAP-285E11.7-002;DADB-118P11.6-002;DAMA-26D6.4-002;DAMC-316D20.6-002;DASS-191K16.1-002;XXbac-BCX111D4.1-002;XXbac-BPG252P9.3-002	Isoform 1 of Mediator of DNA damage checkpoint protein 1;227 kDa protein;227 kDa protein;Isoform 2 of Mediator of DNA damage checkpoint protein 1;Isoform 3 of Mediator of DNA damage checkpoint protein 1;Isoform 4 of Mediator of DNA damage checkpoint protei		1.5499	2	2	2	1.2	1.2	226.66	2089
Serine/threonine-protein phosphatase 6 regulatory subunit 3;SAPS domain family member 3;Sporulation-induced transcript 4-associated protein SAPL	SAPS3;C11orf23;KIAA1558;PP6R3;SAPL	Isoform 5 of Serine/threonine-protein phosphatase 6 regulatory subunit 3;Isoform 1 of Serine/threonine-protein phosphatase 6 regulatory subunit 3;Isoform 2 of Serine/threonine-protein phosphatase 6 regulatory subunit 3;Isoform 6 of Serine/threonine-protein		1.5479	2	1	2	1.6	1.6	98.484	879
UPF0568 protein C14orf166;CLE	C14orf166;CGI-99	UPF0568 protein C14orf166;CLE		1.5474	8	5	8	26.2	26.2	28.068	244
Eukaryotic translation elongation factor 1 epsilon-1;Multisynthetase complex auxiliary component p18;Elongation factor p18	EEF1E1;AIMP3;P18	Eukaryotic translation elongation factor 1 epsilon-1;eukaryotic translation elongation factor 1 epsilon 1 isoform 2		1.53	2	1	2	5.7	5.7	19.81	174
Pre-mRNA-processing factor 19;PRP19/PSO4 homolog;Nuclear matrix protein 200;Senescence evasion factor	PRPF19;NMP200;PRP19;SNEV	Pre-mRNA-processing factor 19		1.5213	6	3	6	12.7	12.7	55.18	504
28S ribosomal protein S22, mitochondrial;MRP-S22;Mitochondrial ribosomal protein S22 variant	MRPS22;C3orf5;RPMS22;GK002	28S ribosomal protein S22, mitochondrial;25 kDa protein;23 kDa protein;Mitochondrial ribosomal protein S22 variant		1.5167	8	5	8	20.3	20.3	41.28	360
Putative uncharacterized protein MATR3;Matrin-3	MATR3;KIAA0723	Putative uncharacterized protein MATR3;Matrin-3		1.5097	4	3	4	5.4	5.4	99.966	895
Trifunctional enzyme subunit beta, mitochondrial;TP-beta;3-ketoacyl-CoA thiolase;Acetyl-CoA acyltransferase;Beta-ketothiolase;Putative uncharacterized protein HADHB	HADHB;MSTP029	Trifunctional enzyme subunit beta, mitochondrial;Putative uncharacterized protein HADHB		1.5096	2	1	2	4.2	4.2	51.294	474
Transcription intermediary factor 1-beta;Tripartite motif-containing protein 28;Nuclear corepressor KAP-1;KRAB-associated protein 1;KRAB-interacting protein 1;RING finger protein 96	TRIM28;KAP1;RNF96;TIF1B	Isoform 1 of Transcription intermediary factor 1-beta;Isoform 2 of Transcription intermediary factor 1-beta		1.499	33	17	33	32.2	32.2	88.549	835
Small nuclear ribonucleoprotein F	SNRPF;PBSCF	Small nuclear ribonucleoprotein F		1.4919	2	2	2	39.5	39.5	9.7251	86
General transcription factor 3C polypeptide 5;Transcription factor IIIC subunit epsilon;TF3C-epsilon;TFIIIC 63 kDa subunit;General transcription factor IIIC, polypeptide 5, 63kDa;General transcription factor IIIC, polypeptide 5, 63kDa, isoform CRA_c	GTF3C5;CDABP0017;RP11-326L24.5-007;RP11-326L24.5-005;hCG_31454;RP11-326L24.5-006	Isoform 3 of General transcription factor 3C polypeptide 5;Isoform 1 of General transcription factor 3C polypeptide 5;General transcription factor IIIC, polypeptide 5, 63kDa;Isoform 2 of General transcription factor 3C polypeptide 5;General transcription f		1.489	3	2	3	5.5	5.5	60.368	526
Monofunctional C1-tetrahydrofolate synthase, mitochondrial;Formyltetrahydrofolate synthetase;Methylenetetrahydrofolate dehydrogenase (NADP+ dependent) 1-like	MTHFD1L;FTHFSDC1;RP1-292B18.2-004	Isoform 1 of Monofunctional C1-tetrahydrofolate synthase, mitochondrial;Methylenetetrahydrofolate dehydrogenase (NADP+ dependent) 1-like		1.4707	8	5	8	8.1	8.1	105.79	978
Heterogeneous nuclear ribonucleoprotein H3;cDNA FLJ57726, highly similar to Heterogeneous nuclear ribonucleoprotein H3	HNRNPH3;HNRPH3	Isoform 1 of Heterogeneous nuclear ribonucleoprotein H3;Isoform 2 of Heterogeneous nuclear ribonucleoprotein H3;Isoform 3 of Heterogeneous nuclear ribonucleoprotein H3;cDNA FLJ57726, highly similar to Heterogeneous nuclear ribonucleoprotein H3;Isoform 4 of		1.4697	4	2	4	9.5	9.5	36.926	346
Small nuclear ribonucleoprotein-associated proteins B and B';Sm-B/Sm-B';Putative uncharacterized protein SNRPB;cDNA FLJ41124 fis, clone BRACE2014850, highly similar to Small nuclear ribonucleoprotein-associated protein N;Small nuclear ribonucleoprotein B';Small nuclear ribonucleoprotein-associated protein N;Tissue-specific-splicing protein	SNRPB;COD;SNRPB1;SNRPN;HCERN3;SMN	Isoform SM-B1 of Small nuclear ribonucleoprotein-associated proteins B and B';Putative uncharacterized protein SNRPB;30 kDa protein;cDNA FLJ41124 fis, clone BRACE2014850, highly similar to Small nuclear ribonucleoprotein-associated protein N;Small nuclear		1.4686	4	3	4	12.5	12.5	30.032	289
Actin-like protein 6A;53 kDa BRG1-associated factor A;Actin-related protein Baf53a;ArpNbeta;INO80 complex subunit K	ACTL6A;BAF53;BAF53A;INO80K	Isoform 1 of Actin-like protein 6A;Isoform 2 of Actin-like protein 6A;14 kDa protein		1.4636	3	3	3	10.5	10.5	47.46	429
Heterogeneous nuclear ribonucleoprotein F;Nucleolin-like protein mcs94-1;Heterogeneous nuclear ribonucleoprotein F, N-terminally processed	HNRNPF;HNRPF	Heterogeneous nuclear ribonucleoprotein F		1.4534	16	9	16	39.5	37.1	45.671	415
Isoleucyl-tRNA synthetase, cytoplasmic;Isoleucine--tRNA ligase;IARS protein	IARS	Isoleucyl-tRNA synthetase, cytoplasmic;isoleucyl-tRNA synthetase;IARS protein		1.4522	23	15	24	17.1	17.1	144.96	1266
Golgi integral membrane protein 4;Golgi phosphoprotein 4;Golgi integral membrane protein, cis;Golgi-localized phosphoprotein of 130 kDa	GOLIM4;GIMPC;GOLPH4;GPP130	Golgi integral membrane protein 4		1.4472	10	4	10	8	8	81.879	696
Tubulin gamma-1 chain;Gamma-1-tubulin;Gamma-tubulin complex component 1;Tubulin gamma-2 chain;Gamma-2-tubulin	TUBG1;TUBG;TUBG2	Tubulin gamma-1 chain;Tubulin gamma-2 chain		1.443	7	4	7	15.5	15.5	51.169	451
Protein SET;Phosphatase 2A inhibitor I2PP2A;Template-activating factor I;HLA-DR-associated protein II;PHAPII;Inhibitor of granzyme A-activated DNase;cDNA FLJ59759, highly similar to Protein SET;Putative uncharacterized protein SET;SET nuclear oncogene	SET;RP11-216B9.3-003;RP11-216B9.3-010	similar to template acyivating factor-I alpha;Isoform 1 of Protein SET;Isoform 2 of Protein SET;SET translocation;Putative uncharacterized protein SET;SET translocation;similar to template acyivating factor-I alpha;similar to template acyivating factor-I a		1.4382	3	2	3	7.9	7.9	33.645	292
Methionyl-tRNA synthetase, cytoplasmic;Methionine--tRNA ligase;cDNA FLJ53309, highly similar to Methionyl-tRNA synthetase (EC 6.1.1.10);cDNA FLJ55046, highly similar to Methionyl-tRNA synthetase (EC 6.1.1.10)	MARS	Methionyl-tRNA synthetase, cytoplasmic;cDNA FLJ53309, highly similar to Methionyl-tRNA synthetase;cDNA FLJ55046, highly similar to Methionyl-tRNA synthetase		1.4361	11	6	11	9.6	9.6	101.11	900
cDNA FLJ75459;Nucleolysin TIA-1 isoform p40;p40-TIA-1;RNA-binding protein TIA-1;Nucleolysin TIA-1 isoform p15;p15-TIA-1;Nucleolysin TIAR;TIA-1-related protein;T-cluster binding protein;TIA1 cytotoxic granule-associated RNA binding protein-like 1, isoform CRA_a;Putative uncharacterized protein TIAL1	TIA1;TIAL1;hCG_40603	TIA-1 related protein isoform 2;Isoform Long of Nucleolysin TIA-1 isoform p40;Isoform Short of Nucleolysin TIA-1 isoform p40;Nucleolysin TIAR;TIA1 cytotoxic granule-associated RNA binding protein-like 1, isoform CRA_a;cDNA FLJ57984, highly similar to Nucle		1.4347	2	1	2	3.3	3.3	43.448	392
Homeobox protein Hox-B6;Hox-2B;Hox-2.2;HU-2	HOXB6;HOX2B	Isoform 1 of Homeobox protein Hox-B6;Isoform 2 of Homeobox protein Hox-B6		1.4289	2	2	2	15.2	15.2	25.432	224
Interleukin enhancer-binding factor 2;Nuclear factor of activated T-cells 45 kDa;Interleukin enhancer binding factor 2 variant	ILF2;NF45;PRO3063	Interleukin enhancer-binding factor 2;Interleukin enhancer binding factor 2 variant (Fragment)		1.4201	24	11	24	37.4	37.4	43.062	390
O-phosphoseryl-tRNA(Sec) selenium transferase;Selenocysteine synthase;Selenocysteinyl-tRNA(Sec) synthase;Sep-tRNA:Sec-tRNA synthase;UGA suppressor tRNA-associated protein;tRNA(Ser/Sec)-associated antigenic protein;Liver-pancreas antigen;Soluble liver antigen;SLA/LP autoantigen;SLA-p35	SEPSECS;TRNP48	Isoform 1 of O-phosphoseryl-tRNA(Sec) selenium transferase;Isoform 2 of O-phosphoseryl-tRNA(Sec) selenium transferase		1.416	15	7	15	22.2	22.2	55.726	501
Putative uncharacterized protein SUMO3;cDNA FLJ57440, moderately similar to Small ubiquitin-related modifier 3;SMT3 suppressor of mif two 3 homolog 3 (Yeast), isoform CRA_d;Small ubiquitin-related modifier 3;Ubiquitin-like protein SMT3A;SMT3 homolog 1;SUMO-2;Small ubiquitin-like modifier 4;SMT3 suppressor of mif two 3 homolog 4 (S. cerevisiae);SMT3 suppressor of mif two 3 homolog 4 (Yeast);Small …	SUMO3;SMT3A;SMT3H1;SUMO4;hCG_2044856;SUMO2;SMT3B;SMT3H2;SMT3H4	Putative uncharacterized protein SUMO2;cDNA FLJ57440, moderately similar to Small ubiquitin-related modifier 3;SMT3 suppressor of mif two 3 homolog 3 (Yeast), isoform CRA_d;Small ubiquitin-related modifier 3;SMT3 suppressor of mif two 3 homolog 4;Small ubi		1.4155	2	1	2	8.2	8.2	16.956	147
cDNA FLJ33051 fis, clone TRACH1000063, highly similar to B-cell receptor-associated protein 31;B-cell receptor-associated protein 31, isoform CRA_b;cDNA FLJ43643 fis, clone STOMA2008546, highly similar to B-cell receptor-associated protein 31;B-cell receptor-associated protein 31;BCR-associated protein Bap31;p28 Bap31;Protein CDM;6C6-AG tumor-associated antigen	BCAP31;hCG_2004982;BAP31;DXS1357E	B-cell receptor-associated protein 31 isoform a;B-cell receptor-associated protein 31;21 kDa protein;21 kDa protein		1.4147	2	2	3	9.3	9.3	34.752	313
PRMT1 protein;Protein arginine N-methyltransferase 1;Interferon receptor 1-bound protein 4;cDNA FLJ60588, highly similar to Protein arginine N-methyltransferase 1 (EC 2.1.1.-)	PRMT1;HMT2;HRMT1L2;IR1B4	HMT1 hnRNP methyltransferase-like 2 isoform 3;HMT1 hnRNP methyltransferase-like 2 isoform 1;Isoform 2 of Protein arginine N-methyltransferase 1;Isoform 3 of Protein arginine N-methyltransferase 1;cDNA FLJ60588, highly similar to Protein arginine N-methyltr		1.4068	20	10	20	43.1	43.1	40.548	353
ATP-binding cassette sub-family E member 1;RNase L inhibitor;Ribonuclease 4 inhibitor;2'-5'-oligoadenylate-binding protein;HuHP68	ABCE1;RLI;RNASEL1;RNASELI;RNS4I;OK/SW-cl.40	ATP-binding cassette sub-family E member 1		1.4034	6	3	6	7.3	7.3	67.314	599
Glutaminyl-tRNA synthetase;Glutamine--tRNA ligase;cDNA FLJ54453, highly similar to Glutaminyl-tRNA synthetase (EC 6.1.1.18);Glutaminyl-tRNA synthetase, isoform CRA_a;cDNA FLJ54487, highly similar to Glutaminyl-tRNA synthetase (EC 6.1.1.18)	QARS;hCG_96727	Glutaminyl-tRNA synthetase;cDNA FLJ54453, highly similar to Glutaminyl-tRNA synthetase;cDNA FLJ54487, highly similar to Glutaminyl-tRNA synthetase		1.4016	9	5	9	9	9	89.656	793
ATP-dependent RNA helicase A;Nuclear DNA helicase II;DEAH box protein 9	DHX9;DDX9;LKP;NDH2	ATP-dependent RNA helicase A		1.3968	48	26	48	28.7	28.7	140.96	1270
cDNA FLJ61576, highly similar to Mitochondrial fission regulator 1;Mitochondrial fission regulator 1;Chondrocyte protein with a poly-proline region	MTFR1;CHPPR;KIAA0009	cDNA FLJ61576, highly similar to Mitochondrial fission regulator 1;Mitochondrial fission regulator 1		1.3786	7	4	7	15.2	15.2	38.715	348
NADH dehydrogenase [ubiquinone] 1 alpha subcomplex subunit 5;NADH-ubiquinone oxidoreductase 13 kDa-B subunit;Complex I-13kD-B;Complex I subunit B13;Putative uncharacterized protein DKFZp781K1356	NDUFA5;DKFZp781K1356	NADH dehydrogenase [ubiquinone] 1 alpha subcomplex subunit 5;Putative uncharacterized protein DKFZp781K1356		1.3762	4	2	4	23.3	23.3	13.459	116
Stomatin-like protein 2;EPB72-like 2;cDNA FLJ61039, highly similar to Stomatin-like protein 2;cDNA FLJ27036 fis, clone SLV08019, highly similar to Homo sapiens stomatin (EPB72)-like 2 (STOML2)	STOML2;SLP2;HSPC108	Stomatin-like protein 2;cDNA FLJ61039, highly similar to Stomatin-like protein 2;cDNA FLJ27036 fis, clone SLV08019, highly similar to Homo sapiens stomatin (EPB72)-like 2		1.3709	11	6	11	27.8	27.8	38.534	356
Calumenin;Crocalbin;IEF SSP 9302	CALU	Calumenin, isoform CRA_c;Isoform 2 of Calumenin		1.3518	2	1	2	5	5	38.05	323
ATP-dependent RNA helicase DDX3X;DEAD box protein 3, X-chromosomal;Helicase-like protein 2;DEAD box, X isoform;ATP-dependent RNA helicase DDX3Y;DEAD box protein 3, Y-chromosomal;cDNA FLJ60675, highly similar to ATP-dependent RNA helicase DDX3X (EC 3.6.1.-);cDNA FLJ53122, highly similar to ATP-dependent RNA helicase DDX3Y (EC 3.6.1.-)	DDX3X;DBX;DDX3;DDX3Y;DBY	ATP-dependent RNA helicase DDX3X;ATP-dependent RNA helicase DDX3Y;cDNA FLJ60675, highly similar to ATP-dependent RNA helicase DDX3X;cDNA FLJ53122, highly similar to ATP-dependent RNA helicase DDX3Y		1.3442	20	11	21	29.5	27.8	73.243	662
Heterogeneous nuclear ribonucleoprotein U (Scaffold attachment factor A);Heterogeneous nuclear ribonucleoprotein U;Scaffold attachment factor A;p120;pp120;cDNA FLJ54020, highly similar to Heterogeneous nuclear ribonucleoprotein U;cDNA FLJ44920 fis, clone BRAMY3011501, highly similar to Heterogeneous nuclear ribonucleoprotein U	HNRNPU;RP11-11N7.3-002;HNRPU;SAFA;U21.1;RP11-11N7.3-003;RP11-11N7.3-004	heterogeneous nuclear ribonucleoprotein U isoform a;Isoform Long of Heterogeneous nuclear ribonucleoprotein U;Isoform Short of Heterogeneous nuclear ribonucleoprotein U;cDNA FLJ54020, highly similar to Heterogeneous nuclear ribonucleoprotein U;cDNA FLJ4492		1.3427	51	23	51	32.1	31.4	90.583	825
Cleavage stimulation factor 50 kDa subunit;CF-1 50 kDa subunit;CstF-50	CSTF1	Cleavage stimulation factor 50 kDa subunit		1.339	2	1	2	4.2	4.2	48.357	431
Lysyl-tRNA synthetase;Lysine--tRNA ligase;Lysyl-tRNA synthetase, isoform CRA_d;Putative uncharacterized protein KARS;cDNA FLJ44621 fis, clone BRACE2016896, highly similar to Lysyl-tRNA synthetase (EC 6.1.1.6)	KARS;KIAA0070	Lysyl-tRNA synthetase;lysyl-tRNA synthetase isoform 1;cDNA FLJ44621 fis, clone BRACE2016896, highly similar to Lysyl-tRNA synthetase		1.3352	16	8	16	21.1	21.1	68.047	597
Pre-mRNA-processing factor 39;PRP39 homolog;PRPF39 protein	PRPF39	PRP39 pre-mRNA processing factor 39 homolog;cDNA FLJ20666 fis, clone KAIA608		1.3342	79	31	80	46.3	46.3	78.429	669
40S ribosomal protein S27;Metallopan-stimulin 1;Ribosomal protein S27;40S ribosomal protein S27-like protein;Putative uncharacterized protein RPS27	RPS27;MPS1;LOC392748;tcag7.1276;RPS27L	40S ribosomal protein S27;Ribosomal protein S27;40S ribosomal protein S27-like protein;similar to hCG1783679;9 kDa protein;similar to hCG2027326;Ribosomal protein S27;13 kDa protein;similar to metallopanstimulin;similar to metallopanstimulin;Similar to 40S		1.3335	12	4	12	41.7	41.7	9.461	84
Reticulocalbin-1	RCN1;RCN	Reticulocalbin-1		1.3317	2	1	2	5.7	5.7	38.89	331
Centrosomal protein of 97 kDa;Leucine-rich repeat and IQ domain-containing protein 2;cDNA FLJ60110, highly similar to Homo sapiens leucine-rich repeats and IQ motif containing 2 (LRRIQ2), mRNA	CEP97;LRRIQ2	Isoform 2 of Centrosomal protein of 97 kDa;Isoform 1 of Centrosomal protein of 97 kDa;cDNA FLJ60110, highly similar to Homo sapiens leucine-rich repeats and IQ motif containing 2 (LRRIQ2), mRNA		1.3275	13	8	13	16.9	16.9	99.907	891
tRNA selenocysteine 1-associated protein 1;tRNA selenocysteine-associated protein 1;SECp43	TRNAU1AP;SECP43;TRSPAP1	Isoform 1 of tRNA selenocysteine 1-associated protein 1;Isoform 2 of tRNA selenocysteine 1-associated protein 1		1.3266	8	4	9	16	16	32.498	287
Clathrin light chain A	CLTA	Isoform Non-brain of Clathrin light chain A		1.3209	2	1	2	9.6	9.6	23.662	218
Heterogeneous nuclear ribonucleoprotein U-like protein 2;Scaffold-attachment factor A2	HNRNPUL2;HNRPUL2	Heterogeneous nuclear ribonucleoprotein U-like protein 2		1.315	15	9	17	18.5	18.5	85.104	747
Probable ATP-dependent RNA helicase DDX5;DEAD box protein 5;RNA helicase p68;cDNA FLJ59339, highly similar to Probable ATP-dependent RNA helicase DDX5 (EC 3.6.1.-)	DDX5;G17P1;HELR;HLR1	Probable ATP-dependent RNA helicase DDX5;cDNA FLJ59357, highly similar to Probable ATP-dependent RNA helicase DDX5		1.3126	48	16	52	39.9	27.5	69.147	614
28S ribosomal protein S34, mitochondrial;MRP-S34;Mitochondrial 28S ribosomal protein S34	MRPS34	26 kDa protein;28S ribosomal protein S34, mitochondrial;Mitochondrial 28S ribosomal protein S34		1.3055	5	3	5	15.6	15.6	26.332	225
UPF0444 transmembrane protein C12orf23	C12orf23	UPF0444 transmembrane protein C12orf23		1.3026	3	2	4	36.2	36.2	11.748	116
U1 small nuclear ribonucleoprotein 70 kDa	SNRNP70;RNPU1Z;RPU1;SNRP70;U1AP1	Isoform 1 of U1 small nuclear ribonucleoprotein 70 kDa;Isoform 2 of U1 small nuclear ribonucleoprotein 70 kDa;Isoform 3 of U1 small nuclear ribonucleoprotein 70 kDa		1.3002	2	2	2	5.7	5.7	51.556	437
40S ribosomal protein SA;Laminin receptor 1;37/67 kDa laminin receptor;Laminin-binding protein precursor p40;37 kDa laminin receptor precursor;67 kDa laminin receptor;Colon carcinoma laminin-binding protein;NEM/1CHD4;Multidrug resistance-associated protein MGr1-Ag;Putative uncharacterized protein RPSAP18;Laminin receptor-like protein LAMRL5	RPSA;LAMBR;LAMR1;RPSAP18;LAMR1P15	33 kDa protein;40S ribosomal protein SA;Similar to Ribosomal protein 40;Putative uncharacterized protein ENSP00000346598;Laminin receptor-like protein LAMRL5;similar to 40S ribosomal protein SA (p40) (34/67 kDa laminin receptor) (Colon carcinoma laminin-bi		1.2995	30	13	30	62.7	62.7	33.313	300
BAG family molecular chaperone regulator 4;Bcl-2-associated athanogene 4;Silencer of death domains;cDNA FLJ50950, highly similar to BAG family molecular chaperone regulator 4	BAG4;SODD	BAG family molecular chaperone regulator 4;cDNA FLJ50950, highly similar to BAG family molecular chaperone regulator 4		1.2926	7	3	7	12.7	12.7	49.593	457
BTB/POZ domain-containing protein KCTD6	KCTD6	BTB/POZ domain-containing protein KCTD6		1.2795	8	5	8	23.2	23.2	27.61	237
Eukaryotic translation initiation factor 3 subunit I;Eukaryotic translation initiation factor 3 subunit 2;eIF-3-beta;eIF3 p36;TGF-beta receptor-interacting protein 1	EIF3I;EIF3S2;TRIP1	Eukaryotic translation initiation factor 3 subunit I		1.279	10	5	10	30.8	30.8	36.501	325
Diablo homolog, mitochondrial;Second mitochondria-derived activator of caspase;Direct IAP-binding protein with low pI;SMAC3	DIABLO;SMAC	Diablo homolog, mitochondrial precursor;diablo isoform 3 precursor;Isoform 2 of Diablo homolog, mitochondrial;19 kDa protein;18 kDa protein;14 kDa protein		1.2779	3	2	3	6.7	6.7	35.845	315
NADH-ubiquinone oxidoreductase 75 kDa subunit, mitochondrial;Complex I-75kD	NDUFS1	cDNA FLJ55978, highly similar to NADH-ubiquinone oxidoreductase 75 kDa subunit, mitochondrial		1.274	8	5	8	10.3	10.3	80.996	741
Guanine nucleotide-binding protein subunit beta-2-like 1;Guanine nucleotide-binding protein subunit beta-like protein 12.3;Receptor of activated protein kinase C 1;Receptor for activated C kinase;Cell proliferation-inducing gene 21 protein;Human lung cancer oncogene 7 protein;cDNA FLJ60170, highly similar to Guanine nucleotide-binding protein subunit beta 2-like 1	GNB2L1;HLC7;PIG21	38 kDa protein;Guanine nucleotide-binding protein subunit beta-2-like 1;cDNA FLJ60170, highly similar to Guanine nucleotide-binding protein subunit beta 2-like 1		1.2628	38	17	39	61.8	61.8	37.757	346
Galectin-3-binding protein;Lectin galactoside-binding soluble 3-binding protein;Mac-2-binding protein;Tumor-associated antigen 90K;Basement membrane autoantigen p105;cDNA FLJ53427, highly similar to Galectin-3-binding protein;cDNA FLJ31415 fis, clone NT2NE2000284, highly similar to Galectin-3-binding protein;cDNA FLJ53509, highly similar to Galectin-3-binding protein	LGALS3BP;M2BP	Galectin-3-binding protein;similar to lectin, galactoside-binding, soluble, 3 binding protein;cDNA FLJ54583, highly similar to Galectin-3-binding protein;cDNA FLJ53509, highly similar to Galectin-3-binding protein		1.2581	27	15	27	33.5	33.5	65.33	585
Mitochondrial import inner membrane translocase subunit Tim9	TIMM9;TIM9;TIM9A;TIMM9A	Mitochondrial import inner membrane translocase subunit Tim9		1.2571	4	2	4	29.2	29.2	10.378	89
C-1-tetrahydrofolate synthase, cytoplasmic;Methylenetetrahydrofolate dehydrogenase;Methenyltetrahydrofolate cyclohydrolase;Formyltetrahydrofolate synthetase	MTHFD1;MTHFC;MTHFD	C-1-tetrahydrofolate synthase, cytoplasmic;105 kDa protein		1.2504	54	27	55	38.2	38.2	101.56	935
Protein TFG;TRK-fused gene protein;Putative MAPK activating protein;Tyrosine-protein kinase receptor;TFG protein	TFG;TFG/ALK fusion	Protein TFG;Putative MAPK activating protein;Tyrosine-protein kinase receptor;TFG protein;18 kDa protein;18 kDa protein;15 kDa protein		1.2428	64	16	64	47.2	47.2	43.433	400
60S acidic ribosomal protein P1;Putative uncharacterized protein RPLP1;Ribosomal protein, large, P1, isoform CRA_b	RPLP1;RRP1	60S acidic ribosomal protein P1;similar to 60S acidic ribosomal protein P1;ribosomal protein P1 isoform 2		1.2355	7	3	9	71.9	57	11.514	114
BetaCstF-64 variant 2;Cleavage stimulation factor 64 kDa subunit;CF-1 64 kDa subunit;cDNA FLJ58787, highly similar to Cleavage stimulation factor 64 kDa subunit;Cleavage stimulation factor 64 kDa subunit, tau variant;TauCstF-64;CF-1 64 kDa subunit, tau variant	CSTF2;CSTF2T;KIAA0689	BetaCstF-64 variant 2;Isoform 1 of Cleavage stimulation factor 64 kDa subunit;Isoform 2 of Cleavage stimulation factor 64 kDa subunit;cDNA FLJ58787, highly similar to Cleavage stimulation factor 64 kDa subunit;Cleavage stimulation factor 64 kDa subunit, ta		1.234	3	2	3	4.9	4.9	62.928	597
Arginyl-tRNA synthetase, cytoplasmic;Arginine--tRNA ligase	RARS	Isoform Complexed of Arginyl-tRNA synthetase, cytoplasmic;Isoform Monomeric of Arginyl-tRNA synthetase, cytoplasmic		1.2303	16	10	18	19.5	19.5	75.378	660
DnaJ homolog subfamily B member 6;Heat shock protein J2;MSJ-1;HHDJ1;MRJ;cDNA FLJ52214, highly similar to DnaJ homolog subfamily B member 6;cDNA FLJ53562, highly similar to DnaJ homolog subfamily B member 6;DnaJ (Hsp40) homolog, subfamily B, member 3;HCG3 protein;Putative uncharacterized protein tmp_locus_21	DNAJB6;HSJ2;MRJ;MSJ1;DNAJB3;tmp_locus_21	Isoform A of DnaJ homolog subfamily B member 6;Isoform C of DnaJ homolog subfamily B member 6;cDNA FLJ52214, highly similar to DnaJ homolog subfamily B member 6;Isoform B of DnaJ homolog subfamily B member 6;cDNA FLJ53562, highly similar to DnaJ homolog su		1.2268	2	1	2	4	4	36.087	326
DNA-dependent protein kinase catalytic subunit;DNPK1;p460	PRKDC;HYRC;HYRC1	Isoform 1 of DNA-dependent protein kinase catalytic subunit;Isoform 2 of DNA-dependent protein kinase catalytic subunit;similar to DNA dependent protein kinase catalytic subunit		1.2257	125	63	126	20.5	20.5	469.08	4128
Sjoegren syndrome/scleroderma autoantigen 1;Autoantigen p27	SSSCA1	Sjoegren syndrome/scleroderma autoantigen 1		1.2105	11	5	12	59.3	59.3	21.474	199
Heterogeneous nuclear ribonucleoprotein K;Transformation up-regulated nuclear protein;cDNA FLJ54552, highly similar to Heterogeneous nuclear ribonucleoprotein K;cDNA FLJ39066 fis, clone NT2RP7014743, highly similar to HETEROGENEOUS NUCLEAR RIBONUCLEOPROTEIN K;cDNA FLJ41122 fis, clone BRACE2013911, highly similar to HETEROGENEOUS NUCLEAR RIBONUCLEOPROTEIN K	HNRNPK;HNRPK;RP11-575L7.1-005;RP11-575L7.1-001	Isoform 2 of Heterogeneous nuclear ribonucleoprotein K;Isoform 1 of Heterogeneous nuclear ribonucleoprotein K;Isoform 3 of Heterogeneous nuclear ribonucleoprotein K;cDNA FLJ54552, highly similar to Heterogeneous nuclear ribonucleoprotein K;Heterogeneous nu		1.2084	14	8	14	23.1	23.1	51.028	464
Translation initiation factor eIF-2B subunit epsilon;eIF-2B GDP-GTP exchange factor subunit epsilon	EIF2B5;EIF2BE	Translation initiation factor eIF-2B subunit epsilon;49 kDa protein;11 kDa protein;7 kDa protein		1.2068	4	2	4	4.9	4.9	80.379	721
DNA-directed RNA polymerases I and III subunit RPAC1;DNA-directed RNA polymerases I and III 40 kDa polypeptide;RPC40;AC40;RPA39;Polymerase (RNA) I polypeptide C, 30kDa;cDNA FLJ57708, highly similar to DNA-directed RNA polymerase I 40 kDa polypeptide (EC 2.7.7.6)	POLR1C;POLR1E;RP3-337H4.4-005;RP3-337H4.4-007	Isoform 1 of DNA-directed RNA polymerases I and III subunit RPAC1;Isoform 2 of DNA-directed RNA polymerases I and III subunit RPAC1;OTTHUMP00000016467;cDNA FLJ57708, highly similar to DNA-directed RNA polymerase I 40 kDa polypeptide;OTTHUMP00000016469		1.2022	2	1	2	5.2	5.2	39.249	346
Heterogeneous nuclear ribonucleoprotein U-like protein 1;Adenovirus early region 1B-associated protein 5;E1B-55 kDa-associated protein 5	HNRNPUL1;E1BAP5;HNRPUL1	Isoform 1 of Heterogeneous nuclear ribonucleoprotein U-like protein 1;Isoform 2 of Heterogeneous nuclear ribonucleoprotein U-like protein 1;Isoform 4 of Heterogeneous nuclear ribonucleoprotein U-like protein 1;Isoform 3 of Heterogeneous nuclear ribonucleop		1.2018	92	34	94	39.7	39	95.737	856
Dihydrolipoyllysine-residue succinyltransferase component of 2-oxoglutarate dehydrogenase complex, mitochondrial;Dihydrolipoamide succinyltransferase component of 2-oxoglutarate dehydrogenase complex;E2K;Dihydrolipoamide S-succinyltransferase (E2 component of 2-oxo-glutarate complex), isoform CRA_c;Full-length cDNA 5-PRIME end of clone CS0DB006YE12 of Neuroblastoma of Homo sapiens (human);Dihydro…	DLST;DLTS;hCG_22359	Dihydrolipoyllysine-residue succinyltransferase component of 2-oxoglutarate dehydrogenase complex, mitochondrial;Dihydrolipoamide S-succinyltransferase (E2 component of 2-oxo-glutarate complex), isoform CRA_c;Full-length cDNA 5-PRIME end of clone CS0DJ009Y		1.2014	4	2	4	6.4	6.4	48.729	453
Small nuclear ribonucleoprotein E;Putative small nuclear ribonucleoprotein polypeptide E-like protein 1;Putative uncharacterized protein SNRPE	SNRPE;SNRPEL1	Small nuclear ribonucleoprotein E;Putative small nuclear ribonucleoprotein polypeptide E-like protein 1;Putative uncharacterized protein SNRPEL1		1.1987	2	2	4	25	25	10.803	92
Nucleosome assembly protein 1-like 1;NAP-1-related protein;cDNA FLJ30458 fis, clone BRACE2009421, highly similar to NUCLEOSOME ASSEMBLY PROTEIN 1-LIKE 1;cDNA FLJ16112 fis, clone 3NB692001853, highly similar to NUCLEOSOME ASSEMBLY PROTEIN 1-LIKE 1;Nucleosome assembly protein 1-like 1, isoform CRA_c	NAP1L1;NRP;hCG_2015037	Nucleosome assembly protein 1-like 1;cDNA FLJ30458 fis, clone BRACE2009421, highly similar to NUCLEOSOME ASSEMBLY PROTEIN 1-LIKE 1;Nucleosome assembly protein 1-like 1, isoform CRA_c;15 kDa protein		1.1887	8	4	8	14.6	14.6	45.374	391
Synaptic glycoprotein SC2;Trans-2,3-enoyl-CoA reductase	GPSN2;SC2	Isoform 1 of Synaptic glycoprotein SC2;Isoform 2 of Synaptic glycoprotein SC2		1.1815	2	1	2	3.2	3.2	36.034	308
General transcription factor 3C polypeptide 3;Transcription factor IIIC subunit gamma;TFIIIC 102 kDa subunit	GTF3C3	Isoform 1 of General transcription factor 3C polypeptide 3;17 kDa protein		1.1811	2	2	2	3	3	101.27	886
Cytochrome b-c1 complex subunit 6, mitochondrial;Ubiquinol-cytochrome c reductase complex 11 kDa protein;Cytochrome c1 non-heme 11 kDa protein;Mitochondrial hinge protein;Complex III subunit VIII;Complex III subunit 6;UQCRH protein;Ubiquinol-cytochrome c reductase hinge protein, isoform CRA_c	UQCRH;hCG_22091	Cytochrome b-c1 complex subunit 6, mitochondrial;Ubiquinol-cytochrome c reductase hinge protein, isoform CRA_c		1.1775	2	1	2	19.8	19.8	10.739	91
Elongation factor 2;cDNA FLJ56548, highly similar to Elongation factor 2	EEF2;EF2	Elongation factor 2;cDNA FLJ56548, highly similar to Elongation factor 2		1.1713	21	12	24	17	17	95.337	858
5'-3' exoribonuclease 2;DHM1-like protein	XRN2	Isoform 1 of 5'-3' exoribonuclease 2;Isoform 2 of 5'-3' exoribonuclease 2		1.1649	2	1	2	1.9	1.9	108.58	950
Src substrate cortactin;Amplaxin;Oncogene EMS1;cDNA FLJ34459 fis, clone HLUNG2002916, highly similar to SRC SUBSTRATE CORTACTIN;cDNA FLJ54828, highly similar to Src substrate cortactin;Putative uncharacterized protein CTTN	CTTN;EMS1;hCG_23463	Src substrate cortactin;cortactin isoform b;Cortactin, isoform CRA_a;Putative uncharacterized protein CTTN		1.1639	12	7	12	24.2	24.2	61.585	550
116 kDa U5 small nuclear ribonucleoprotein component;U5 snRNP-specific protein, 116 kDa;Elongation factor Tu GTP-binding domain-containing protein 2;cDNA FLJ59627, highly similar to 116 kDa U5 small nuclear ribonucleoprotein component;cDNA, FLJ78997, highly similar to 116 kDa U5 small nuclear ribonucleoprotein component	EFTUD2;KIAA0031;SNRP116	116 kDa U5 small nuclear ribonucleoprotein component;elongation factor Tu GTP binding domain containing 2 isoform b		1.16	2	1	2	1.3	1.3	109.43	972
Zinc finger CCCH-type antiviral protein 1;Zinc finger CCCH domain-containing protein 2;Zinc finger antiviral protein	ZC3HAV1;ZC3HDC2;PRO1677	Isoform 1 of Zinc finger CCCH-type antiviral protein 1;Isoform 2 of Zinc finger CCCH-type antiviral protein 1;Isoform 3 of Zinc finger CCCH-type antiviral protein 1		1.1571	2	1	2	2.1	2.1	101.44	902
Putative uncharacterized protein RCN2;Reticulocalbin-2;Calcium-binding protein ERC-55;E6-binding protein	RCN2;ERC55	Putative uncharacterized protein RCN2;Reticulocalbin-2		1.1548	12	6	12	29.6	29.6	39.139	335
A-kinase anchor protein 8-like;Neighbor of A-kinase-anchoring protein 95;Homologous to AKAP95 protein;Helicase A-binding protein 95;cDNA FLJ58398, highly similar to A-kinase anchor protein 8;cDNA FLJ10732 fis, clone NT2RP3001384, highly similar to A-kinase anchor protein 8;A kinase (PRKA) anchor protein 8-like, isoform CRA_d;Putative uncharacterized protein DKFZp434L0650	AKAP8L;NAKAP95;HRIHFB2018;hCG_36782;DKFZp434L0650	A-kinase anchor protein 8-like;cDNA FLJ58398, highly similar to A-kinase anchor protein 8;47 kDa protein;A kinase (PRKA) anchor protein 8-like, isoform CRA_d;39 kDa protein;Putative uncharacterized protein DKFZp434L0650		1.1512	24	13	25	29.4	29.4	71.639	646
Mitochondrial inner membrane protein;Mitofilin;p87/89;Cell proliferation-inducing gene 4 protein;cDNA FLJ59418, highly similar to Mitochondrial inner membrane protein;IMMT protein	IMMT;HMP;PIG4	Isoform 1 of Mitochondrial inner membrane protein;inner membrane protein, mitochondrial isoform 2;Isoform 2 of Mitochondrial inner membrane protein;cDNA FLJ59418, highly similar to Mitochondrial inner membrane protein;IMMT protein (Fragment)		1.1384	4	4	6	8.6	8.6	83.677	758
Bifunctional aminoacyl-tRNA synthetase;Proliferation-inducing gene 32 protein;Glutamyl-tRNA synthetase;Glutamate--tRNA ligase;Prolyl-tRNA synthetase;Proline--tRNA ligase;cDNA FLJ56021, highly similar to Bifunctional aminoacyl-tRNA synthetase[Includes: Glutamyl-tRNA synthetase (EC 6.1.1.17)	EPRS;GLNS;PARS;QARS;QPRS;PIG32	Bifunctional aminoacyl-tRNA synthetase;cDNA FLJ56021, highly similar to Bifunctional aminoacyl-tRNA synthetase[Includes: Glutamyl-tRNA synthetase (Fragment)		1.1372	33	19	34	18.7	18.7	170.65	1512
Prohibitin;Prohibitin variant;Putative uncharacterized protein PHB;cDNA FLJ51562, highly similar to Prohibitin	PHB	Prohibitin;Prohibitin variant (Fragment);Putative uncharacterized protein PHB;23 kDa protein;cDNA FLJ51562, highly similar to Prohibitin		1.1361	12	6	12	25.4	25.4	29.804	272
Phenylalanyl-tRNA synthetase beta chain;Phenylalanine--tRNA ligase beta chain	FARSB;FARSLB;FRSB;HSPC173	Phenylalanyl-tRNA synthetase beta chain		1.1264	21	11	21	23.3	23.3	66.129	589
Methylosome protein 50;WD repeat-containing protein 77;Androgen receptor cofactor p44;p44/Mep50;cDNA FLJ55120, moderately similar to Methylosome protein 50;cDNA FLJ60601, highly similar to Methylosome protein 50	WDR77;MEP50;HKMT1069;Nbla10071	Methylosome protein 50;cDNA FLJ55120, moderately similar to Methylosome protein 50;cDNA FLJ60601, highly similar to Methylosome protein 50		1.1262	8	5	8	17.5	17.5	36.724	342
Aminoacyl tRNA synthetase complex-interacting multifunctional protein 2;Multisynthetase complex auxiliary component p38;Protein JTV-1;Putative uncharacterized protein STAG3L3	AIMP2;JTV1;PRO0992;STAG3L3	Multisynthetase complex auxiliary component p38;28 kDa protein;Putative uncharacterized protein ENSP00000383327		1.1255	7	4	7	20	20	35.348	320
Glutamate dehydrogenase 1, mitochondrial;cDNA FLJ16138 fis, clone BRALZ2017531, highly similar to Glutamate dehydrogenase 1, mitochondrial (EC 1.4.1.3);Glutamate dehydrogenase 1, isoform CRA_a;Glutamate dehydrogenase 2, mitochondrial	GLUD1;GLUD;hCG_1993805;GLUD2;GLUDP1	Glutamate dehydrogenase 1, mitochondrial;Glutamate dehydrogenase 1, isoform CRA_a;Glutamate dehydrogenase 2, mitochondrial		1.1254	23	13	24	30.8	30.8	61.397	558
Probable ATP-dependent RNA helicase DDX17;DEAD box protein 17;RNA-dependent helicase p72;DEAD box protein p72;DEAD (Asp-Glu-Ala-Asp) box polypeptide 17	DDX17;RP3-434P1.4-009;RP3-434P1.4-005	DEAD box polypeptide 17 isoform 1;Isoform 3 of Probable ATP-dependent RNA helicase DDX17;Isoform 2 of Probable ATP-dependent RNA helicase DDX17;DEAD (Asp-Glu-Ala-Asp) box polypeptide 17;cDNA FLJ58652, highly similar to Probable ATP-dependent RNA helicase D		1.1253	24	13	25	33.6	23.2	80.272	729
DNA-directed RNA polymerases I, II, and III subunit RPABC1;DNA-directed RNA polymerase II subunit E;RPB5;DNA-directed RNA polymerase II 23 kDa polypeptide;XAP4	POLR2E	DNA-directed RNA polymerases I, II, and III subunit RPABC1		1.1159	3	2	3	11	11	24.551	210
Golgin subfamily A member 1;Golgin-97	GOLGA1	Golgin subfamily A member 1		1.1131	11	6	11	11.7	11.7	88.199	767
cDNA FLJ77317, highly similar to Homo sapiens retinoblastoma binding protein 7 (RBBP7), mRNA;Histone-binding protein RBBP7;Retinoblastoma-binding protein 7;Retinoblastoma-binding protein p46;Histone acetyltransferase type B subunit 2;Nucleosome-remodeling factor subunit RBAP46;Retinoblastoma binding protein 7	RBBP7;RP11-716A19.5-008;RBAP46;RP11-716A19.5-010;RP11-716A19.5-004;RP11-716A19.5-007	Retinoblastoma binding protein 7;Histone-binding protein RBBP7;Retinoblastoma binding protein 7;Retinoblastoma binding protein 7;Retinoblastoma binding protein 7		1.1085	6	4	6	29	23	52.314	469
Mitochondrial ribosomal protein S28 variant;28S ribosomal protein S28, mitochondrial;MRP-S28;MRP-S35	MRPS28;MRPS35;HSPC007	Mitochondrial ribosomal protein S28 variant;28S ribosomal protein S28, mitochondrial;20 kDa protein;12 kDa protein;11 kDa protein		1.1079	2	1	2	4.7	4.7	21.381	192
Heterogeneous nuclear ribonucleoprotein D0;AU-rich element RNA-binding protein 1;P37 AUF1	HNRNPD;AUF1;HNRPD	Isoform 1 of Heterogeneous nuclear ribonucleoprotein D0;Isoform 2 of Heterogeneous nuclear ribonucleoprotein D0;Isoform 3 of Heterogeneous nuclear ribonucleoprotein D0;Isoform 4 of Heterogeneous nuclear ribonucleoprotein D0;P37 AUF1;31 kDa protein		1.1071	22	8	22	24.8	22.5	38.434	355
Protein transport protein Sec61 subunit alpha isoform 1	SEC61A1;SEC61A	cDNA FLJ59739, highly similar to Protein transport protein Sec61 subunit alpha isoform 1		1.1069	2	1	2	4.1	4.1	52.949	482
Nuclease-sensitive element-binding protein 1;Y-box-binding protein 1;Y-box transcription factor;YB-1;CCAAT-binding transcription factor I subunit A;Enhancer factor I subunit A;DNA-binding protein B;Nuclease sensitive element binding protein-1	YBX1;NSEP1;YB1	Nuclease-sensitive element-binding protein 1;Protein;Nuclease sensitive element binding protein-1;24 kDa protein		1.1039	24	6	24	60.2	47.5	35.924	324
Cytochrome c oxidase polypeptide 7A2, mitochondrial;Cytochrome c oxidase polypeptide VIIa-liver/heart;Putative uncharacterized protein COX7A2	COX7A2;COX7AL	Cytochrome c oxidase polypeptide 7A2, mitochondrial;Putative uncharacterized protein COX7A2		1.1032	2	1	2	11.3	11.3	12.844	115
NADH dehydrogenase [ubiquinone] 1 beta subcomplex subunit 10;NADH-ubiquinone oxidoreductase PDSW subunit;Complex I-PDSW;NADH dehydrogenase (Ubiquinone) 1 beta subcomplex, 10, 22kDa, isoform CRA_a;NDUFB10 protein	NDUFB10;hCG_42700	NADH dehydrogenase [ubiquinone] 1 beta subcomplex subunit 10;NDUFB10 protein		1.0996	2	1	2	8.1	8.1	20.776	172
Heterogeneous nuclear ribonucleoproteins A2/B1	HNRNPA2B1;HNRPA2B1	43 kDa protein;Isoform B1 of Heterogeneous nuclear ribonucleoproteins A2/B1;Isoform A2 of Heterogeneous nuclear ribonucleoproteins A2/B1;34 kDa protein;28 kDa protein		1.097	17	8	17	26.1	26.1	43.251	414
Tight junction-associated protein 1;Tight junction protein 4;Protein incorporated later into tight junctions;Novel protein	TJAP1;PILT;TJP4;RP3-337H4.1;RP3-337H4.1-005	Isoform 1 of Tight junction-associated protein 1;Isoform 2 of Tight junction-associated protein 1;Isoform 4 of Tight junction-associated protein 1;Isoform 3 of Tight junction-associated protein 1;Novel protein		1.0924	6	4	6	12	12	61.82	557
Actin, alpha cardiac muscle 1;Alpha-cardiac actin;Actin, alpha skeletal muscle;Alpha-actin-1;Actin, aortic smooth muscle;Alpha-actin-2;Cell growth-inhibiting gene 46 protein;Actin, gamma-enteric smooth muscle;Smooth muscle gamma-actin;Gamma-2-actin;Alpha-actin-3;ACTA2 protein;Putative uncharacterized protein ACTA1;Actin alpha 1 skeletal muscle protein	ACTC1;ACTC;ACTA1;ACTA;ACTA2;ACTSA;ACTVS;GIG46;ACTG2;ACTA3;ACTL3;ACTSG	Actin, alpha cardiac muscle 1;Actin, alpha skeletal muscle;Actin, aortic smooth muscle;Actin, gamma-enteric smooth muscle;ACTA2 protein (Fragment);Putative uncharacterized protein ACTA1;Actin alpha 1 skeletal muscle protein		1.0902	2	1	2	21	4.2	42.019	377
cAMP-dependent protein kinase type II-beta regulatory subunit;cAMP-dependent protein kinase type II-alpha regulatory subunit;PRKAR2A protein;Protein kinase, cAMP-dependent, regulatory, type II, alpha;Protein kinase, cAMP-dependent, regulatory, type II, alpha, isoform CRA_b	PRKAR2B;PRKAR2A;PKR2;PRKAR2;hCG_1779456	cAMP-dependent protein kinase type II-beta regulatory subunit;cAMP-dependent protein kinase type II-alpha regulatory subunit;Protein kinase, cAMP-dependent, regulatory, type II, alpha, isoform CRA_b;38 kDa protein;36 kDa protein		1.085	2	1	2	3.6	3.6	46.302	418
SPTLC1 protein;Serine palmitoyltransferase 1;Serine-palmitoyl-CoA transferase 1;Long chain base biosynthesis protein 1;Serine palmitoyltransferase, long chain base subunit 1	SPTLC1;LCB1;RP11-118F2.1-002	SPTLC1 protein;Serine palmitoyltransferase 1;serine palmitoyltransferase subunit 1 isoform b		1.0792	3	2	3	6.2	6.2	57.396	513
Ankyrin repeat domain-containing protein 40	ANKRD40	Ankyrin repeat domain-containing protein 40		1.0778	8	5	8	21.2	21.2	41.088	368
Eukaryotic translation initiation factor 3 subunit F;Eukaryotic translation initiation factor 3 subunit 5;eIF-3-epsilon;eIF3 p47	EIF3F;EIF3S5	HCG1784554, isoform CRA_a		1.0773	4	2	4	8.6	8.6	39.146	372
Dynein light chain 1, cytoplasmic;Dynein light chain LC8-type 1;8 kDa dynein light chain;DLC8;Protein inhibitor of neuronal nitric oxide synthase;Dynein light chain 2, cytoplasmic;Dynein light chain LC8-type 2	DYNLL1;DLC1;DNCL1;DNCLC1;HDLC1;DYNLL2;DLC2	Dynein light chain 1, cytoplasmic;Dynein light chain 2, cytoplasmic		1.0694	4	2	4	38.2	38.2	10.366	89
Prohibitin-2;B-cell receptor-associated protein BAP37;Repressor of estrogen receptor activity;D-prohibitin;cDNA FLJ56579, highly similar to Prohibitin-2	PHB2;BAP;REA	Prohibitin-2;cDNA FLJ56579, highly similar to Prohibitin-2		1.063	16	9	17	32.8	32.8	33.296	299
Cytochrome b-c1 complex subunit 7;Ubiquinol-cytochrome c reductase complex 14 kDa protein;Complex III subunit 7;Complex III subunit VII;QP-C	UQCRB;UQBP	16 kDa protein;Cytochrome b-c1 complex subunit 7;12 kDa protein		1.0581	2	1	2	11.4	11.4	16.266	140
Heterogeneous nuclear ribonucleoprotein R;HNRPR protein;cDNA FLJ53360, highly similar to Heterogeneous nuclear ribonucleoprotein R;cDNA FLJ53358, highly similar to Heterogeneous nuclear ribonucleoprotein R;Putative uncharacterized protein DKFZp686A13234	HNRNPR;HNRPR;RP5-1057J7.2-002;hCG_38907;DKFZp686A13234	Heterogeneous nuclear ribonucleoprotein R;heterogeneous nuclear ribonucleoprotein R isoform 1;heterogeneous nuclear ribonucleoprotein R isoform 4;Heterogeneous nuclear ribonucleoprotein-R2;heterogeneous nuclear ribonucleoprotein R isoform 3		1.051	15	7	15	19.9	13.1	70.942	633
Phenylalanyl-tRNA synthetase alpha chain;Phenylalanine--tRNA ligase alpha chain;CML33;cDNA FLJ50378, highly similar to Phenylalanyl-tRNA synthetase alpha chain (EC 6.1.1.20)	FARSA;FARS;FARSL;FARSLA	Phenylalanyl-tRNA synthetase alpha chain;cDNA FLJ50378, highly similar to Phenylalanyl-tRNA synthetase alpha chain		1.0384	40	16	40	39.4	39.4	57.563	508
RNA-binding protein FUS;Oncogene FUS;Oncogene TLS;Translocated in liposarcoma protein;POMp75;75 kDa DNA-pairing protein;cDNA FLJ58049, highly similar to RNA-binding protein FUS;BBF2H7/FUS protein;Putative uncharacterized protein FUS	FUS;TLS	Fus-like protein (Fragment);Isoform Short of RNA-binding protein FUS;53 kDa protein;cDNA FLJ58049, highly similar to RNA-binding protein FUS;BBF2H7/FUS protein (Fragment);Putative uncharacterized protein FUS		1.0358	18	8	18	14	14	53.376	528
DNA-binding protein A;Cold shock domain-containing protein A;Single-strand DNA-binding protein NF-GMB;CSDA protein variant	CSDA;DBPA	Isoform 1 of DNA-binding protein A;Isoform 3 of DNA-binding protein A;Isoform 2 of DNA-binding protein A;CSDA protein variant (Fragment)		1.0314	6	3	6	36.8	25.8	40.089	372
HIV Tat-specific factor 1;cDNA FLJ60139, highly similar to Homo sapiens HIV TAT specific factor 1 (HTATSF1), mRNA;HIV-1 Tat specific factor 1	HTATSF1;RP1-196E23.2-002;RP1-196E23.2-003	HIV Tat-specific factor 1;cDNA FLJ60139, highly similar to Homo sapiens HIV TAT specific factor 1 (HTATSF1), mRNA;HIV-1 Tat specific factor 1		1.0279	4	2	4	3.8	3.8	85.852	755
Protein LSM14 homolog A;Protein SCD6 homolog;Protein FAM61A;Putative alpha-synuclein-binding protein;cDNA FLJ54754, highly similar to Protein FAM61A	LSM14A;C19orf13;FAM61A	Isoform 2 of Protein LSM14 homolog A;Isoform 1 of Protein LSM14 homolog A;cDNA FLJ54754, highly similar to Protein FAM61A		1.0278	9	6	9	21.2	21.2	50.553	463
Inosine-5'-monophosphate dehydrogenase 2;IMPDH-II;IMPD 2	IMPDH2;IMPD2	Inosine-5'-monophosphate dehydrogenase 2		1.0269	24	9	24	39.7	27.4	55.804	514
Putative uncharacterized protein FAM98B;Protein FAM98B	FAM98B	family with sequence similarity 98, member B isoform 1;Protein FAM98B		1.0268	5	3	5	9.9	9.9	45.547	433
cDNA FLJ31747 fis, clone NT2RI2007377, highly similar to RNA-BINDING PROTEIN EWS;Ewing sarcoma breakpoint region 1, isoform CRA_h;RNA-binding protein EWS;EWS oncogene;Ewing sarcoma breakpoint region 1 protein;EWSR1 protein;Ewing sarcoma breakpoint region 1;Ewing sarcoma breakpoint region 1, isoform CRA_b;Ewing sarcoma breakpoint region 1, isoform CRA_g	EWSR1;hCG_2010995;EWS;AC002059.7-002;AC002059.7-007;AC002059.7-008	Ewing sarcoma breakpoint region 1, isoform CRA_h;Isoform EWS of RNA-binding protein EWS;Ewing sarcoma breakpoint region 1, isoform CRA_b;Ewing sarcoma breakpoint region 1;cDNA FLJ32119 fis, clone PEBLM1000034, highly similar to RNA-BINDING PROTEIN EWS;Isof		1.0251	20	7	20	15.1	15.1	69.052	662
Eukaryotic translation initiation factor 2 subunit 3;Eukaryotic translation initiation factor 2 subunit gamma;Eukaryotic translation initiation factor 2 subunit 3-like protein	EIF2S3;EIF2G	Eukaryotic translation initiation factor 2 subunit 3;Isoform 1 of Eukaryotic translation initiation factor 2 subunit 3-like protein		1.0217	2	1	2	3	3	51.109	472
FYVE and coiled-coil domain-containing protein 1;Zinc finger FYVE domain-containing protein 7	FYCO1;ZFYVE7	Isoform 1 of FYVE and coiled-coil domain-containing protein 1		1.0174	33	18	33	20.2	20.2	166.95	1478
BTB/POZ domain-containing protein KCTD7	KCTD7	Isoform 1 of BTB/POZ domain-containing protein KCTD7;Isoform 2 of BTB/POZ domain-containing protein KCTD7;42 kDa protein		1.0119	4	2	4	10	10	33.131	289
Casein kinase 2 beta polypeptide;Casein kinase 2, beta polypeptide;Casein kinase 2, beta polypeptide, isoform CRA_d;Casein kinase II subunit beta;Phosvitin;G5a	CSNK2B;DADB-127H9.2-004;DAMA-236L13.2-004;DAMC-157M7.2-004;DAQB-195H10.8-004;DASS-336N12.7-004;XXbac-BCX88C14.4-004;hCG_43725;CK2N;G5A;DADB-127H9.2-002;DAMA-236L13.2-002;DAMC-157M7.2-002;DAQB-195H10.8-002;DASS-336N12.7-002;XXbac-BCX88C14.4-002;XXbac-BPG32J3.6-002	Casein kinase 2, beta polypeptide;Casein kinase II subunit beta;Casein kinase 2, beta polypeptide;18 kDa protein		1.0049	6	3	6	17.9	17.9	26.925	234
YTH domain family protein 3;Putative uncharacterized protein YTHDF1;YTH domain family protein 1;Dermatomyositis associated with cancer putative autoantigen 1	YTHDF3;YTHDF1;C20orf21	cDNA FLJ56221, highly similar to YTH domain protein 3;Putative uncharacterized protein YTHDF1;Isoform 1 of YTH domain family protein 1		1.0029	2	1	2	2.4	2.4	64.521	588
cDNA, FLJ92904, highly similar to Homo sapiens casein kinase 2, alpha 1 polypeptide (CSNK2A1), mRNA;Casein kinase II subunit alpha;Casein kinase 2 alpha isoform;Casein kinase II alpha subunit;HCG21984	CSNK2A1;CK2A1;hCG_21984	CSNK2A1 protein;Casein kinase II subunit alpha;Casein kinase 2 alpha isoform;Casein kinase II alpha subunit		1.0011	10	6	10	23.4	23.4	45.908	397
Complement component 1 Q subcomponent-binding protein, mitochondrial;Glycoprotein gC1qBP;GC1q-R protein;Hyaluronan-binding protein 1;Mitochondrial matrix protein p32;p33	C1QBP;GC1QBP;HABP1;SF2P32	Complement component 1 Q subcomponent-binding protein, mitochondrial;20 kDa protein		0.99781	13	6	14	29.4	29.4	31.362	282
Heterogeneous nuclear ribonucleoprotein A3;cDNA FLJ58832, highly similar to Heterogeneous nuclear ribonucleoprotein A3	HNRNPA3;HNRPA3	Isoform 1 of Heterogeneous nuclear ribonucleoprotein A3;Isoform 2 of Heterogeneous nuclear ribonucleoprotein A3;cDNA FLJ58832, highly similar to Heterogeneous nuclear ribonucleoprotein A3		0.98427	18	9	19	33.9	33.9	39.594	378
Protein transport protein Sec61 subunit beta	SEC61B	Protein transport protein Sec61 subunit beta		0.98378	2	1	2	10.4	10.4	9.9743	96
60S ribosomal protein L38	RPL38	60S ribosomal protein L38;8 kDa protein		0.97979	13	6	13	50	50	8.2178	70
Eukaryotic translation initiation factor 3 subunit B;Eukaryotic translation initiation factor 3 subunit 9;eIF-3-eta;eIF3 p116;eIF3 p110;Prt1 homolog	EIF3B;EIF3S9	Isoform 2 of Eukaryotic translation initiation factor 3 subunit B;Isoform 1 of Eukaryotic translation initiation factor 3 subunit B;33 kDa protein		0.97976	13	7	13	13.3	13.3	99.028	873
Heterogeneous nuclear ribonucleoprotein Q;Synaptotagmin-binding, cytoplasmic RNA-interacting protein;Glycine- and tyrosine-rich RNA-binding protein;GRY-RBP;NS1-associated protein 1	SYNCRIP;HNRPQ;NSAP1	Isoform 1 of Heterogeneous nuclear ribonucleoprotein Q;Isoform 3 of Heterogeneous nuclear ribonucleoprotein Q;Isoform 2 of Heterogeneous nuclear ribonucleoprotein Q;Isoform 4 of Heterogeneous nuclear ribonucleoprotein Q;Isoform 5 of Heterogeneous nuclear r		0.97747	27	10	27	33.5	26.6	69.602	623
DNA-directed RNA polymerases I, II, and III subunit RPABC5;DNA-directed RNA polymerase III subunit L;RPB10;DNA-directed RNA polymerase II 7.6 kDa polypeptide;RPB7.6	POLR2L	DNA-directed RNA polymerases I, II, and III subunit RPABC5		0.97534	2	2	2	29.9	29.9	7.645	67
Protein LSM14 homolog B;Protein FAM61B;LSM14 homolog B (SCD6, S. cerevisiae);cDNA FLJ52017, moderately similar to Protein FAM61B	LSM14B;C20orf40;FAM61B;RP5-1005F21.2-003;RP5-1005F21.2-006;RP5-1005F21.2-002	Isoform 1 of Protein LSM14 homolog B;Isoform 2 of Protein LSM14 homolog B;LSM14 homolog B;LSM14 homolog B;LSM14 homolog B		0.97409	4	2	4	8.8	8.8	42.07	385
cDNA FLJ61202, highly similar to Multisynthetase complex auxiliary component p43;Aminoacyl tRNA synthetase complex-interacting multifunctional protein 1;Multisynthetase complex auxiliary component p43;Endothelial monocyte-activating polypeptide 2;EMAP-II;Small inducible cytokine subfamily E member 1;cDNA FLJ52127, highly similar to Multisynthetase complex auxiliary component p43	AIMP1;EMAP2;SCYE1	small inducible cytokine subfamily E, member 1 isoform b precursor;Multisynthetase complex auxiliary component p43;cDNA FLJ52127, highly similar to Multisynthetase complex auxiliary component p43		0.97234	19	9	19	47.9	47.9	37.039	336
60S ribosomal protein L11;CLL-associated antigen KW-12;Ribosomal protein L11	RPL11;RP11-223J15.3-005;RP11-223J15.3-004	Isoform 1 of 60S ribosomal protein L11;Isoform 2 of 60S ribosomal protein L11;Ribosomal protein L11;Ribosomal protein L11		0.97212	12	6	12	41.6	41.6	20.252	178
ATP-dependent DNA helicase 2 subunit 2;ATP-dependent DNA helicase II 80 kDa subunit;Lupus Ku autoantigen protein p86;86 kDa subunit of Ku antigen;Ku86;Ku80;Thyroid-lupus autoantigen;CTC box-binding factor 85 kDa subunit;Nuclear factor IV;DNA repair protein XRCC5;Putative uncharacterized protein XRCC5	XRCC5;G22P2	ATP-dependent DNA helicase 2 subunit 2;Putative uncharacterized protein XRCC5		0.96615	49	24	49	34.3	34.3	82.704	732
Heterogeneous nuclear ribonucleoprotein A1;Helix-destabilizing protein;Single-strand RNA-binding protein;Putative heterogeneous nuclear ribonucleoprotein A1-like protein 3;Heterogeneous nuclear ribonucleoprotein A1-like protein 2;cDNA FLJ51586, moderately similar to Heterogeneous nuclear ribonucleoprotein A1;cDNA FLJ51587, highly similar to Heterogeneous nuclear ribonucleoprotein A1	HNRNPA1;HNRPA1;HNRPA1L3;HNRNPA1L2;HNRNPA1L	Isoform A1-B of Heterogeneous nuclear ribonucleoprotein A1;Similar to Heterogeneous nuclear ribonucleoprotein A1;Isoform A1-A of Heterogeneous nuclear ribonucleoprotein A1;Isoform 2 of Heterogeneous nuclear ribonucleoprotein A1;Putative heterogeneous nucle		0.96515	20	10	22	34.1	34.1	38.845	372
Leucine-rich repeat-containing protein 59	LRRC59;PRO1855	Leucine-rich repeat-containing protein 59		0.96119	8	4	8	21.8	21.8	34.93	307
Beta-actin;Actin, cytoplasmic 1;Actin, cytoplasmic 1, N-terminally processed;Actin, cytoplasmic 2;Gamma-actin;Actin, cytoplasmic 2, N-terminally processed;cDNA FLJ58286, highly similar to Actin, cytoplasmic 2	ACTB;ACTG1;ACTG	Beta actin variant (Fragment);>IPI:CON_00698900.1|SWISS-PROT:P60712 (Bos taurus) Actin, cytoplasmic 1;Actin, cytoplasmic 1;Actin, cytoplasmic 2;cDNA FLJ52842, highly similar to Actin, cytoplasmic 1;cDNA FLJ43573 fis, clone RECTM2001691, highly similar to A		0.9539	25	5	27	42.4	25.6	41.722	375
Lupus La protein;Sjoegren syndrome type B antigen;La ribonucleoprotein;La autoantigen;SS-B/La protein	SSB	Lupus La protein;SS-B/La protein		0.95283	5	3	5	7.8	7.8	46.836	408
Small nuclear ribonucleoprotein Sm D3;snRNP core protein D3;cDNA FLJ51872, highly similar to Small nuclear ribonucleoprotein Sm D3	SNRPD3	19 kDa protein;Small nuclear ribonucleoprotein Sm D3;cDNA FLJ51872, highly similar to Small nuclear ribonucleoprotein Sm D3;7 kDa protein		0.95282	7	4	7	24	24	18.829	175
Putative uncharacterized protein EIF3D;Eukaryotic translation initiation factor 3 subunit D;Eukaryotic translation initiation factor 3 subunit 7;eIF-3-zeta;eIF3 p66	EIF3D;EIF3S7	Putative uncharacterized protein EIF3D;Eukaryotic translation initiation factor 3 subunit D		0.94862	6	4	6	10.2	10.2	63.902	548
Small nuclear ribonucleoprotein Sm D1;snRNP core protein D1;Sm-D autoantigen	SNRPD1	16 kDa protein;Small nuclear ribonucleoprotein Sm D1;hypothetical protein;9 kDa protein		0.94835	4	2	4	16.1	16.1	16.235	149
RNA-binding protein 14;RNA-binding motif protein 14;RRM-containing coactivator activator/modulator;Synaptotagmin-interacting protein;Paraspeckle protein 2;RNA binding motif protein 14 variant	RBM14;SIP	Isoform 1 of RNA-binding protein 14;RNA binding motif protein 14 variant (Fragment)		0.94514	6	3	6	10	7.6	69.491	669
Splicing factor U2AF 65 kDa subunit;U2 auxiliary factor 65 kDa subunit;U2 snRNP auxiliary factor large subunit	U2AF2;U2AF65	Isoform 1 of Splicing factor U2AF 65 kDa subunit;Isoform 2 of Splicing factor U2AF 65 kDa subunit		0.94398	14	7	14	22.7	22.7	53.5	475
Heterogeneous nuclear ribonucleoprotein D-like;JKT41-binding protein;AU-rich element RNA-binding factor;Protein laAUF1	HNRPDL;JKTBP	Isoform 1 of Heterogeneous nuclear ribonucleoprotein D-like;Isoform 2 of Heterogeneous nuclear ribonucleoprotein D-like;Isoform 3 of Heterogeneous nuclear ribonucleoprotein D-like		0.93456	9	4	9	14.3	12.4	46.437	420
U2 small nuclear ribonucleoprotein A'	SNRPA1	U2 small nuclear ribonucleoprotein A';similar to OTTHUMP00000045488, partial		0.93077	2	1	2	5.5	5.5	28.415	255
Splicing factor, arginine/serine-rich 3;Pre-mRNA-splicing factor SRP20;cDNA FLJ52832, highly similar to Splicing factor, arginine/serine-rich 3;Splicing factor, arginine/serine-rich 3, isoform CRA_a	SFRS3;SRP20;hCG_14802	Splicing factor, arginine/serine-rich 3;cDNA FLJ52832, highly similar to Splicing factor, arginine/serine-rich 3		0.92835	4	2	4	18.3	18.3	19.329	164
Poly(U)-binding-splicing factor PUF60;60 kDa poly(U)-binding-splicing factor;FUSE-binding protein-interacting repressor;Siah-binding protein 1;Ro-binding protein 1	PUF60;FIR;ROBPI;SIAHBP1	Isoform 2 of Poly(U)-binding-splicing factor PUF60;Isoform 6 of Poly(U)-binding-splicing factor PUF60;Isoform 4 of Poly(U)-binding-splicing factor PUF60;Isoform 1 of Poly(U)-binding-splicing factor PUF60;Isoform 5 of Poly(U)-binding-splicing factor PUF60;I		0.92722	18	9	18	25.8	25.8	58.171	542
40S ribosomal protein S3	RPS3;OK/SW-cl.26	40S ribosomal protein S3		0.92535	43	16	45	67.1	67.1	26.688	243
NADH dehydrogenase [ubiquinone] 1 beta subcomplex subunit 9;NADH-ubiquinone oxidoreductase B22 subunit;Complex I-B22;LYR motif-containing protein 3	NDUFB9;LYRM3;UQOR22	27 kDa protein;NADH dehydrogenase [ubiquinone] 1 beta subcomplex subunit 9;NADH-ubiquinone oxidoreductase B22 subunit;6 kDa protein		0.92267	2	1	2	6.3	6.3	26.585	221
Histone-binding protein RBBP4;Retinoblastoma-binding protein 4;Retinoblastoma-binding protein p48;Chromatin assembly factor 1 subunit C;Chromatin assembly factor I p48 subunit;CAF-I 48 kDa subunit;CAF-I p48;Nucleosome-remodeling factor subunit RBAP48;cDNA FLJ53908, highly similar to Histone-binding protein RBBP4	RBBP4;RBAP48	Histone-binding protein RBBP4;46 kDa protein;retinoblastoma binding protein 4 isoform b;retinoblastoma binding protein 4 isoform c		0.92152	13	4	13	27.1	20.5	47.655	425
Zinc finger CCHC domain-containing protein 8	ZCCHC8	Isoform 1 of Zinc finger CCHC domain-containing protein 8;Isoform 2 of Zinc finger CCHC domain-containing protein 8;34 kDa protein		0.91651	2	1	2	3.1	3.1	78.576	707
Heterogeneous nuclear ribonucleoprotein G;RNA-binding motif protein, X chromosome;Glycoprotein p43;Heterogeneous nuclear ribonucleoprotein G, N-terminally processed;cDNA FLJ38696 fis, clone KIDNE2001931, highly similar to HETEROGENEOUS NUCLEAR RIBONUCLEOPROTEIN G;cDNA FLJ59107, moderately similar to Heterogeneous nuclear ribonucleoprotein G;RNA-binding motif protein, X-linked-like-2;Testis-specif…	RBMX;HNRPG;RBMXP1;RP11-1114A5.1-003;RBMXL2;HNRNPGT;CCBL2;DKFZp547N1117;RBMXL1;RP4-531M19.2-001;hCG_23341;RP4-531M19.2-002	Heterogeneous nuclear ribonucleoprotein G;cDNA FLJ38696 fis, clone KIDNE2001931, highly similar to HETEROGENEOUS NUCLEAR RIBONUCLEOPROTEIN G;cDNA FLJ59107, moderately similar to Heterogeneous nuclear ribonucleoprotein G;RNA-binding motif protein, X-linked-		0.91166	3	2	3	5.4	5.4	42.331	391
Histone deacetylase 1;Histone deacetylase 2;cDNA FLJ60860, highly similar to Histone deacetylase 1	HDAC1;RPD3L1;HDAC2;RP4-811H24.2-010	Histone deacetylase 1;histone deacetylase 2;cDNA FLJ60860, highly similar to Histone deacetylase 1;Histone deacetylase 1;18 kDa protein		0.90995	8	4	8	9.3	9.3	55.102	482
Nucleolar RNA helicase 2;Nucleolar RNA helicase II;Nucleolar RNA helicase Gu;RH II/Gu;Gu-alpha;DEAD box protein 21	DDX21	Isoform 1 of Nucleolar RNA helicase 2;Isoform 2 of Nucleolar RNA helicase 2		0.90684	10	6	11	10.9	10.9	87.343	783
60S acidic ribosomal protein P2;Renal carcinoma antigen NY-REN-44	RPLP2;D11S2243E;RPP2	60S acidic ribosomal protein P2		0.88487	27	8	27	97.4	82.6	11.665	115
Heterogeneous nuclear ribonucleoprotein A0	HNRNPA0;HNRPA0	Heterogeneous nuclear ribonucleoprotein A0		0.88252	11	5	11	27.5	27.5	30.84	305
Myocyte-specific enhancer factor 2A;Serum response factor-like protein 1;Myocyte-specific enhancer factor 2C;MEF2A protein	MEF2A;MEF2;MEF2C	Isoform MEFA of Myocyte-specific enhancer factor 2A;Isoform RSRFC9 of Myocyte-specific enhancer factor 2A;Isoform 1 of Myocyte-specific enhancer factor 2C;Isoform 2 of Myocyte-specific enhancer factor 2C;Isoform 3 of Myocyte-specific enhancer factor 2C;myo		0.88138	3	2	3	4	4	54.614	506
cDNA FLJ78093, highly similar to Homo sapiens ribosomal protein L29 (RPL29), mRNA;60S ribosomal protein L29;Cell surface heparin-binding protein HIP	RPL29	cDNA FLJ78093, highly similar to Homo sapiens ribosomal protein L29 (RPL29), mRNA;60S ribosomal protein L29;similar to ribosomal protein L29;hypothetical protein;similar to ribosomal protein L29;27 kDa protein;hypothetical protein;similar to hCG1641491 iso		0.8728	4	2	4	14.5	14.5	17.78	159
Heterogeneous nuclear ribonucleoprotein A/B;APOBEC1-binding protein 1;Putative uncharacterized protein HNRNPAB	HNRNPAB;ABBP1;HNRPAB	Isoform 2 of Heterogeneous nuclear ribonucleoprotein A/B;Putative uncharacterized protein HNRNPAB;Isoform 3 of Heterogeneous nuclear ribonucleoprotein A/B;Isoform 1 of Heterogeneous nuclear ribonucleoprotein A/B;Isoform 4 of Heterogeneous nuclear ribonucle		0.87269	7	4	7	15.1	15.1	35.967	332
Leucyl-tRNA synthetase, cytoplasmic;Leucine--tRNA ligase;LARS protein	LARS;KIAA1352	Leucyl-tRNA synthetase, cytoplasmic;cDNA FLJ58466, highly similar to Leucyl-tRNA synthetase, cytoplasmic		0.87065	14	9	14	9.2	9.2	134.46	1176
Eukaryotic translation initiation factor 3 subunit G;Eukaryotic translation initiation factor 3 subunit 4;eIF-3-delta;Eukaryotic translation initiation factor 3 RNA-binding subunit;eIF3 p44;eIF3 p42	EIF3G;EIF3S4	Eukaryotic translation initiation factor 3 subunit G		0.86877	4	2	4	9.1	9.1	35.611	320
Prefoldin subunit 2	PFDN2;PFD2;HSPC231	Prefoldin subunit 2		0.8684	2	1	2	7.8	7.8	16.648	154
ELAV-like protein 1;Hu-antigen R	ELAVL1;HUR	cDNA FLJ60076, highly similar to ELAV-like protein 1		0.86772	4	2	4	8.5	8.5	38.996	353
NADH dehydrogenase [ubiquinone] flavoprotein 2, mitochondrial;NADH-ubiquinone oxidoreductase 24 kDa subunit;Putative uncharacterized protein ENSP00000343430	NDUFV2	28 kDa protein;NADH dehydrogenase [ubiquinone] flavoprotein 2, mitochondrial;Putative uncharacterized protein ENSP00000343430 (Fragment)		0.85961	2	1	2	5.2	5.2	27.907	252
Signal recognition particle 14 kDa protein;18 kDa Alu RNA-binding protein	SRP14	Signal recognition particle 14 kDa protein;12 kDa protein;9 kDa protein;10 kDa protein;8 kDa protein		0.85556	4	2	4	17.6	17.6	14.57	136
TRM1-like protein	TRM1L;C1orf25;MSTP070	Isoform 1 of TRM1-like protein;Isoform 2 of TRM1-like protein		0.8546	5	3	7	5.6	5.6	81.746	733
cDNA FLJ58953, highly similar to 40S ribosomal protein S20;40S ribosomal protein S20	RPS20	cDNA FLJ58953, highly similar to 40S ribosomal protein S20;40S ribosomal protein S20;7 kDa protein		0.85409	17	7	17	35.9	35.9	16.005	142
40S ribosomal protein S12	RPS12	ribosomal protein S12;40S ribosomal protein S12		0.85102	26	10	26	59.1	59.1	14.515	132
Centrosomal protein 170kDa;Centrosomal protein of 170 kDa;KARP-1-binding protein;KARP1-binding protein;cDNA FLJ53512, highly similar to Homo sapiens centrosomal protein 170 kDa (CEP170), transcript variant alpha, mRNA	CEP170;RP11-411G13.1-004;FAM68A;KAB;KIAA0470	Centrosomal protein 170kDa;Isoform 1 of Centrosomal protein of 170 kDa;Isoform 3 of Centrosomal protein of 170 kDa;Isoform 2 of Centrosomal protein of 170 kDa;cDNA FLJ53512, highly similar to Homo sapiens centrosomal protein 170 kDa (CEP170), transcript va		0.84891	2	1	2	0.9	0.9	179.63	1624
39S ribosomal protein L12, mitochondrial;5c5-2	MRPL12;RPML12	39S ribosomal protein L12, mitochondrial		0.84683	2	2	4	12.6	12.6	21.348	198
SWI/SNF complex subunit SMARCC2;SWI/SNF-related matrix-associated actin-dependent regulator of chromatin subfamily C member 2;SWI/SNF complex 170 kDa subunit;BRG1-associated factor 170;SWI/SNF complex subunit SMARCC1;SWI/SNF-related matrix-associated actin-dependent regulator of chromatin subfamily C member 1;SWI/SNF complex 155 kDa subunit;BRG1-associated factor 155	SMARCC2;BAF170;SMARCC1;BAF155	Isoform 1 of SWI/SNF complex subunit SMARCC2;Isoform 2 of SWI/SNF complex subunit SMARCC2;SWI/SNF complex subunit SMARCC1;67 kDa protein;61 kDa protein		0.84585	2	1	2	0.9	0.9	132.88	1214
General transcription factor 3C polypeptide 6;Transcription factor IIIC subunit 6;TFIIIC 35 kDa subunit	GTF3C6;C6orf51;NPD020;CDA020	General transcription factor 3C polypeptide 6		0.84364	2	1	2	7.5	7.5	24.048	213
Microtubule-associated protein 1A;Proliferation-related protein p80;MAP1 light chain LC2;cDNA FLJ77111, highly similar to Homo sapiens microtubule-associated protein 1A (MAP1A), mRNA	MAP1A;MAP1L	331 kDa protein;Microtubule-associated protein 1A;microtubule-associated protein 1A		0.84359	3	2	3	1.2	0.9	331.25	3041
Splicing factor U2AF 35 kDa subunit;U2 auxiliary factor 35 kDa subunit;U2 snRNP auxiliary factor small subunit;Putative uncharacterized protein DKFZp313J1712;FP793;U2(RNU2) small nuclear RNA auxiliary factor 1, isoform CRA_a	U2AF1;U2AF35;U2AFBP;DKFZp313J1712;hCG_401287	Splicing factor U2AF 35 kDa subunit;U2 small nuclear RNA auxillary factor 1 isoform b;U2 small nuclear RNA auxillary factor 1 isoform c		0.84231	8	3	8	19.2	19.2	27.872	240
Heterogeneous nuclear ribonucleoprotein M	HNRNPM;HNRPM;NAGR1	Isoform 1 of Heterogeneous nuclear ribonucleoprotein M;Isoform 2 of Heterogeneous nuclear ribonucleoprotein M		0.83621	13	8	14	14.9	14.9	77.515	730
Histone H4	HIST1H4A;H4/A;H4FA;HIST1H4B;H4/I;H4FI;HIST1H4C;H4/G;H4FG;HIST1H4D;H4/B;H4FB;HIST1H4E;H4/J;H4FJ;HIST1H4F;H4/C;H4FC;HIST1H4H;H4/H;H4FH;HIST1H4I;H4/M;H4FM;HIST1H4J;H4/E;H4FE;HIST1H4K;H4/D;H4FD;HIST1H4L;H4/K;H4FK;HIST2H4A;H4/N;H4F2;H4FN;HIST2H4;HIST2H4B;H4/O;H4FO;HIST4H4	Histone H4		0.83218	2	1	2	11.7	11.7	11.367	103
Putative ATP-dependent RNA helicase DHX30;DEAH box protein 30	DHX30;DDX30;KIAA0890	Isoform 1 of Putative ATP-dependent RNA helicase DHX30;DEAH (Asp-Glu-Ala-His) box polypeptide 30 isoform 2		0.82797	38	21	38	23.2	23.2	133.94	1194
KH domain-containing, RNA-binding, signal transduction-associated protein 1;p21 Ras GTPase-activating protein-associated p62;GAP-associated tyrosine phosphoprotein p62;Src-associated in mitosis 68 kDa protein;p68;cDNA FLJ54590, highly similar to KH domain-containing, RNA-binding, signaltransduction-associated protein 1	KHDRBS1;SAM68;hCG_41606	Isoform 1 of KH domain-containing, RNA-binding, signal transduction-associated protein 1;cDNA FLJ54590, highly similar to KH domain-containing, RNA-binding, signaltransduction-associated protein 1;Isoform 2 of KH domain-containing, RNA-binding, signal tran		0.8232	2	1	2	4.1	4.1	48.227	443
40S ribosomal protein S2;S4;LLRep3 protein;Putative uncharacterized protein ENSP00000351543	RPS2;RPS4	40S ribosomal protein S2;hypothetical protein isoform 1;hypothetical protein isoform 1;hypothetical protein isoform 2;hypothetical protein isoform 2;hypothetical protein;Similar to Ribosomal protein S2;Putative uncharacterized protein ENSP00000353405;Putat		0.82184	21	9	23	31.4	31.4	31.324	293
40S ribosomal protein S5;40S ribosomal protein S5, N-terminally processed	RPS5	40S ribosomal protein S5		0.81764	20	9	21	42.2	42.2	22.876	204
Insulin-like growth factor 2 mRNA-binding protein 1;IGF-II mRNA-binding protein 1;Coding region determinant-binding protein;VICKZ family member 1;Zip code-binding protein 1	IGF2BP1;CRDBP;VICKZ1;ZBP1	Insulin-like growth factor 2 mRNA-binding protein 1		0.80537	16	9	16	20.5	20.5	63.456	577
40S ribosomal protein S16;cDNA FLJ56786, moderately similar to 40S ribosomal protein S16	RPS16	40S ribosomal protein S16;cDNA FLJ56786, moderately similar to 40S ribosomal protein S16		0.79687	20	9	20	55.5	55.5	16.445	146
Protein LYRIC;Lysine-rich CEACAM1 co-isolated protein;3D3/LYRIC;Metastasis adhesion protein;Astrocyte elevated gene-1 protein	MTDH;AEG1;LYRIC	Protein LYRIC		0.79117	2	1	2	2.2	2.2	63.836	582
Transcriptional coactivator CoAZ;RNA-binding protein 4;RNA-binding motif protein 4;RNA-binding motif protein 4a;Lark homolog	RBM14/RBM4 fusion;RBM4;RBM4A	Transcriptional coactivator CoAZ;Isoform 1 of RNA-binding protein 4		0.78686	2	1	2	13	8.3	37.034	339
Microtubule-associated protein 1B;MAP1 light chain LC1	MAP1B	Microtubule-associated protein 1B		0.78673	59	30	62	21.5	21.1	270.62	2468
40S ribosomal protein S23	RPS23	similar to ribosomal protein S23;40S ribosomal protein S23;similar to hCG1990955;similar to 40S ribosomal protein S23		0.78383	6	2	6	14.4	14.4	16.681	153
Signal recognition particle 9 kDa protein;SRP9 protein;Signal recognition particle 9 kDa isoform;Signal recognition particle 9kDa, isoform CRA_b;Putative uncharacterized protein DKFZp564M2223	SRP9;hCG_1984300;DKFZp564M2223	Signal recognition particle 9 kDa protein;signal recognition particle 9kDa isoform 1;SRP9 protein		0.78349	8	4	8	44.2	44.2	10.112	86
40S ribosomal protein S13	RPS13	40S ribosomal protein S13		0.78326	27	10	27	45	45	17.222	151
Serine/threonine-protein phosphatase 2A catalytic subunit alpha isoform;Replication protein C;Serine/threonine protein phosphatase	PPP2CA	Serine/threonine-protein phosphatase 2A catalytic subunit alpha isoform;Serine/threonine protein phosphatase		0.78256	2	1	2	4.2	4.2	35.594	309
40S ribosomal protein S15;RIG protein	RPS15;RIG	40S ribosomal protein S15;similar to insulinoma protein		0.77734	7	2	7	26.9	26.9	17.04	145
Pre-rRNA-processing protein TSR1 homolog	TSR1;KIAA1401	Pre-rRNA-processing protein TSR1 homolog		0.77687	13	7	15	12.6	12.6	91.809	804
40S ribosomal protein S4, X isoform;Single copy abundant mRNA protein;SCR10;40S ribosomal protein S4, Y isoform 1;Ribosomal protein S4, Y-linked 1;40S ribosomal protein S4, Y isoform 2	RPS4X;CCG2;RPS4;SCAR;RPS4Y1;RPS4Y;PRO2646;RPS4Y2;RPS4Y2P	40S ribosomal protein S4, X isoform;40S ribosomal protein S4, Y isoform 1;Ribosomal protein S4, Y-linked 1;40S ribosomal protein S4, Y isoform 2		0.77649	43	18	45	51	51	29.597	263
40S ribosomal protein S29;Ribosomal protein S29;Putative uncharacterized protein RPS29	RPS29	40S ribosomal protein S29;ribosomal protein S29 isoform 2;similar to mCG7602;similar to mCG7602;similar to mCG7602		0.76996	4	2	4	33.9	33.9	6.6767	56
ATP-dependent DNA helicase Q1;DNA-dependent ATPase Q1;Putative uncharacterized protein RECQL	RECQL;RECQL1	ATP-dependent DNA helicase Q1;Putative uncharacterized protein RECQL (Fragment)		0.76992	7	4	7	8.8	8.8	73.457	649
tRNA (cytosine-5-)-methyltransferase NSUN2;NOL1/NOP2/Sun domain family member 2;tRNA (cytosine-5-)-methyltransferase;tRNA methyltransferase 4 homolog;Substrate of AIM1/Aurora kinase B	NSUN2;SAKI;TRM4	tRNA (cytosine-5-)-methyltransferase NSUN2		0.76853	11	7	11	12.5	12.5	86.47	767
Serine/threonine-protein kinase SRPK1;Serine/arginine-rich protein-specific kinase 1;SFRS protein kinase 1;Putative uncharacterized protein SRPK2;SFRS protein kinase 2, isoform CRA_a;Serine/threonine-protein kinase SRPK2;Serine/arginine-rich protein-specific kinase 2;SFRS protein kinase 2;Serine/threonine-protein kinase SRPK3;Serine/arginine-rich protein-specific kinase 3;Serine/threonine-protein…	SRPK1;SRPK2;SRPK3;MSSK1;STK23;RP3-422H11.1-003	Isoform 2 of Serine/threonine-protein kinase SRPK1;Putative uncharacterized protein SRPK2 (Fragment);SFRS protein kinase 2 isoform a;Putative uncharacterized protein SRPK2 (Fragment);Serine/threonine-protein kinase SRPK2;74 kDa protein;Serine/threonine-pro		0.7668	4	2	4	3.2	3.2	92.446	825
Interleukin enhancer-binding factor 3;Nuclear factor of activated T-cells 90 kDa;Double-stranded RNA-binding protein 76;Translational control protein 80;Nuclear factor associated with dsRNA;M-phase phosphoprotein 4;Interleukin enhancer binding factor 3 isoform c variant	ILF3;DRBF;MPHOSPH4;NF90	Isoform 1 of Interleukin enhancer-binding factor 3;Isoform 3 of Interleukin enhancer-binding factor 3;Isoform 2 of Interleukin enhancer-binding factor 3;Isoform 5 of Interleukin enhancer-binding factor 3;Interleukin enhancer binding factor 3 isoform c vari		0.76095	67	1	67	41.6	5.5	95.337	894
60S ribosomal protein L12	RPL12	Isoform 1 of 60S ribosomal protein L12;similar to mCG18564;Isoform 2 of 60S ribosomal protein L12;similar to ribosomal protein L12		0.75571	16	6	16	54.5	54.5	17.818	165
ATP-dependent DNA helicase 2 subunit 1;ATP-dependent DNA helicase II 70 kDa subunit;Lupus Ku autoantigen protein p70;70 kDa subunit of Ku antigen;Thyroid-lupus autoantigen;CTC box-binding factor 75 kDa subunit;DNA repair protein XRCC6;X-ray repair complementing defective repair in Chinese hamster cells 6 (Ku autoantigen, 70kDa);cDNA FLJ31224 fis, clone KIDNE2004305, highly similar to ATP-dependen…	XRCC6;G22P1;CTA-216E10.7-002;hCG_2013151;CTA-216E10.7-005;CTA-216E10.7-004	ATP-dependent DNA helicase 2 subunit 1;X-ray repair complementing defective repair in Chinese hamster cells 6 (Ku autoantigen, 70kDa), isoform CRA_b;X-ray repair complementing defective repair in Chinese hamster cells 6;X-ray repair complementing defective		0.75555	48	22	48	39.6	39.6	69.842	609
40S ribosomal protein S14	RPS14;PRO2640	40S ribosomal protein S14		0.75258	23	8	23	40.4	40.4	16.273	151
Protein LLP homolog;Protein LAPS18-like	LLPH;C12orf31	UPF0446 protein C12orf31;similar to Chromosome 12 open reading frame 31;similar to hCG2013595;similar to hCG2013595		0.74994	3	2	3	23.3	23.3	15.225	129
40S ribosomal protein S17;Putative uncharacterized protein RPS17P2	RPS17;RPS17P2	40S ribosomal protein S17;16 kDa protein;similar to 40S ribosomal protein S17;Putative uncharacterized protein ENSP00000352682;11 kDa protein		0.74622	21	6	21	50.4	50.4	15.55	135
40S ribosomal protein S15a	RPS15A;OK/SW-cl.82	40S ribosomal protein S15a;similar to hCG1994130		0.73993	19	9	21	60	60	14.839	130
60S ribosomal protein L5	RPL5;MSTP030	60S ribosomal protein L5		0.72746	44	12	45	41.8	41.8	34.362	297
40S ribosomal protein S25	RPS25	40S ribosomal protein S25;14 kDa protein;7 kDa protein		0.72619	9	4	9	24	24	13.742	125
Proliferation-associated protein 2G4;Cell cycle protein p38-2G4 homolog;ErbB3-binding protein 1;PA2G4 protein	PA2G4;EBP1	Proliferation-associated protein 2G4;41 kDa protein;PA2G4 protein (Fragment)		0.7256	47	20	47	55.8	55.8	43.786	394
Eukaryotic peptide chain release factor subunit 1;TB3-1;Protein Cl1	ETF1;ERF1;RF1;SUP45L1	Eukaryotic peptide chain release factor subunit 1		0.72459	4	2	4	6.4	6.4	49.03	437
40S ribosomal protein S10;Ribosomal protein S10;Ribosomal protein S10 variant;Putative 40S ribosomal protein S10-like protein	RPS10;RP11-375E1__A.4-005;RPS10P5;RPS10L	40S ribosomal protein S10;Ribosomal protein S10;40S ribosomal protein S10;Putative 40S ribosomal protein S10-like protein		0.71877	16	5	19	36.4	36.4	18.898	165
Heterogeneous nuclear ribonucleoproteins C1/C2;cDNA FLJ53542, highly similar to Heterogeneous nuclear ribonucleoproteins C;cDNA FLJ52975, highly similar to Heterogeneous nuclear ribonucleoproteins C;cDNA FLJ52993, highly similar to Heterogeneous nuclear ribonucleoprotein C	HNRNPC;HNRPC	Isoform C2 of Heterogeneous nuclear ribonucleoproteins C1/C2;Isoform C1 of Heterogeneous nuclear ribonucleoproteins C1/C2;cDNA FLJ53542, highly similar to Heterogeneous nuclear ribonucleoproteins C;Isoform 4 of Heterogeneous nuclear ribonucleoproteins C1/C		0.71812	6	3	6	12.7	12.7	33.67	306
Putative uncharacterized protein NACA;Nascent polypeptide-associated complex subunit alpha;Alpha-NAC;cDNA FLJ53704, moderately similar to Nascent polypeptide-associated complex subunit alpha	NACA;HSD48	nascent polypeptide-associated complex alpha subunit isoform a;Putative uncharacterized protein NACA;Nascent polypeptide-associated complex subunit alpha;cDNA FLJ53704, moderately similar to Nascent polypeptide-associated complex subunit alpha		0.71707	10	4	10	5.9	5.9	94.68	925
60S ribosomal protein L24;Ribosomal protein L30	RPL24	20 kDa protein;19 kDa protein;60S ribosomal protein L24;13 kDa protein;60S ribosomal protein (Fragment)		0.71397	14	5	14	28.9	28.9	19.569	173
Guanine nucleotide-binding protein-like 3;Nucleolar GTP-binding protein 3;Nucleostemin;E2-induced gene 3 protein;Novel nucleolar protein 47	GNL3;E2IG3;NS	Isoform 1 of Guanine nucleotide-binding protein-like 3;Isoform 2 of Guanine nucleotide-binding protein-like 3;guanine nucleotide binding protein-like 3 isoform 2		0.71362	23	15	25	37.5	37.5	61.996	549
Splicing factor, arginine/serine-rich 2;Splicing factor SC35;Splicing component, 35 kDa;Protein PR264;Splicing factor, arginine/serine-rich 2, isoform CRA_g;cDNA FLJ52570, highly similar to Splicing factor, arginine/serine-rich 2;cDNA FLJ41718 fis, clone HLUNG2013097, highly similar to SPLICING FACTOR, ARGININE/SERINE-RICH 2;cDNA FLJ39750 fis, clone SMINT2017736, moderately similar to SPLICING FA…	SFRS2;hCG_27842	Splicing factor, arginine/serine-rich 2;cDNA FLJ52570, highly similar to Splicing factor, arginine/serine-rich 2;cDNA FLJ35170 fis, clone PLACE6012942, highly similar to SPLICING FACTOR, ARGININE/SERINE-RICH 2;cDNA FLJ39750 fis, clone SMINT2017736, moderat		0.71128	6	3	6	18.6	18.6	25.476	221
RNA-binding protein 39;RNA-binding motif protein 39;RNA-binding region-containing protein 2;Hepatocellular carcinoma protein 1;Splicing factor HCC1;RNA binding motif protein 39;Putative uncharacterized protein DKFZp686A11192;RNA-binding region (RNP1, RRM) containing 2, isoform CRA_d	RBM39;HCC1;RNPC2;RP11-353C18.2-035;DKFZp686A11192;hCG_38221;RP11-353C18.2-020	Isoform 1 of RNA-binding protein 39;Isoform 2 of RNA-binding protein 39;48 kDa protein;RNA binding motif protein 39;RNA-binding region (RNP1, RRM) containing 2, isoform CRA_d;RNA binding motif protein 39		0.71056	2	2	2	6	6	59.379	530
40S ribosomal protein S18;Ke-3	RPS18;D6S218E	40S ribosomal protein S18;similar to ribosomal protein;similar to ribosomal protein S18;17 kDa protein		0.70915	18	8	19	42.1	42.1	17.718	152
40S ribosomal protein S19	RPS19	40S ribosomal protein S19		0.70832	20	9	21	51	51	16.06	145
Poly [ADP-ribose] polymerase 1;ADPRT;NAD(+) ADP-ribosyltransferase 1;Poly[ADP-ribose] synthetase 1	PARP1;ADPRT;PPOL	Poly [ADP-ribose] polymerase 1		0.70693	32	16	34	22.6	22.6	113.08	1014
Inhibitor of nuclear factor kappa-B kinase-interacting protein	IKIP	Isoform 4 of Inhibitor of nuclear factor kappa-B kinase-interacting protein		0.70677	2	1	2	3.4	3.4	43.083	377
Polyadenylate-binding protein 1;cDNA FLJ37875 fis, clone BRSSN2018771, highly similar to Poly(A)-binding protein 1;cDNA FLJ59219, highly similar to Poly(A)-binding protein 1;Polyadenylate-binding protein 3;Testis-specific poly(A)-binding protein	PABPC1;PAB1;PABP1;PABPC2;PABPC3;PABP3;PABPL3	Isoform 1 of Polyadenylate-binding protein 1;Isoform 2 of Polyadenylate-binding protein 1;cDNA FLJ37875 fis, clone BRSSN2018771, highly similar to Poly(A)-binding protein 1;cDNA FLJ59219, highly similar to Poly(A)-binding protein 1;Polyadenylate-binding pr		0.70325	25	10	26	25.3	17.1	70.67	636
Small nuclear ribonucleoprotein Sm D2;snRNP core protein D2	SNRPD2;SNRPD1	Small nuclear ribonucleoprotein Sm D2;similar to hCG2040270;similar to hCG2040270		0.69956	4	2	4	15.3	15.3	13.527	118
40S ribosomal protein S8;Ribosomal protein S8	RPS8;OK/SW-cl.83;RP11-269F19.3-003	25 kDa protein;40S ribosomal protein S8;Ribosomal protein S8		0.69726	39	15	39	54.8	54.8	25.19	217
40S ribosomal protein S6;Phosphoprotein NP33;Ribosomal protein S6;Ribosomal protein S6, isoform CRA_a	RPS6;OK/SW-cl.2;RP11-513M16.6-002;hCG_1741512;RP11-513M16.6-004	40S ribosomal protein S6;Ribosomal protein S6;Ribosomal protein S6		0.69666	20	9	22	27.3	27.3	28.68	249
60S ribosomal protein L31;RPL31 protein	RPL31	60S ribosomal protein L31;15 kDa protein;ribosomal protein L31 isoform 2;ribosomal protein L31 isoform 3;14 kDa protein;13 kDa protein;Protein;similar to mCG49427;9 kDa protein		0.69477	11	5	13	39.2	39.2	14.463	125
Ubiquitin-like protein FUBI;40S ribosomal protein S30	FAU	ubiquitin-like protein fubi and ribosomal protein S30 precursor;40S ribosomal protein S30		0.69378	7	3	8	9	9	14.39	133
Microtubule-associated protein 4	MAP4	110 kDa protein;Isoform 1 of Microtubule-associated protein 4;Isoform 6 of Microtubule-associated protein 4;Isoform 2 of Microtubule-associated protein 4		0.69345	23	12	23	18.3	18.3	109.6	1041
60S ribosomal protein L22-like 1	RPL22L1	60S ribosomal protein L22-like 1		0.68202	2	1	2	17.2	9.8	14.606	122
60S ribosomal protein L39;Putative 60S ribosomal protein L39-like 5;60 ribosomal protein L39 pseudogene 5	RPL39;RPL39P5	Protein;60S ribosomal protein L39;Putative 60S ribosomal protein L39-like 5;similar to mCG146274		0.67608	4	1	4	10.1	10.1	11.502	99
Putative uncharacterized protein RPL30;60S ribosomal protein L30	RPL30	Putative uncharacterized protein RPL30 (Fragment);60S ribosomal protein L30		0.67532	20	7	20	56.5	56.5	12.893	115
40S ribosomal protein S11	RPS11	40S ribosomal protein S11;hypothetical protein		0.67387	30	11	30	46.8	46.8	18.431	158
40S ribosomal protein S9;Putative uncharacterized protein RPS9;Ribosomal protein S9, isoform CRA_c;RPS9 protein	RPS9	40S ribosomal protein S9;Ribosomal protein S9, isoform CRA_c;RPS9 protein (Fragment);Similar to 40S ribosomal protein S9		0.67319	30	14	30	38.7	38.7	22.591	194
Putative uncharacterized protein ENSP00000352132;40S ribosomal protein S7;Putative uncharacterized protein RPS7	RPS7	Putative uncharacterized protein ENSP00000352132;40S ribosomal protein S7;similar to mCG19129;19 kDa protein;18 kDa protein;similar to mCG19129;Putative uncharacterized protein RPS7		0.67154	12	5	12	23.7	23.7	22.113	194
40S ribosomal protein S3a	RPS3A;MFTL	40S ribosomal protein S3a;30 kDa protein;Putative uncharacterized protein ENSP00000374051;similar to v-fos transformation effector protein isoform 2		0.66758	47	21	47	59.8	59.8	29.945	264
CS0DF038YO05 variant;Splicing factor, arginine/serine-rich 5;Pre-mRNA-splicing factor SRP40;Delayed-early protein HRS;Splicing factor, arginine/serine-rich 4;Pre-mRNA-splicing factor SRP75;SRP001LB;Splicing factor, arginine/serine-rich 6;Pre-mRNA-splicing factor SRP55;Arginine/serine-rich splicing factor 6 variant;Putative uncharacterized protein SFRS5;cDNA FLJ50118, highly similar to Splicing fa…	SFRS5;HRS;SRP40;SFRS4;SRP75;SFRS6;SRP55	CS0DF038YO05 variant (Fragment);Isoform SRP40-1 of Splicing factor, arginine/serine-rich 5;Isoform SRP40-4 of Splicing factor, arginine/serine-rich 5;Splicing factor, arginine/serine-rich 4;Isoform SRP55-1 of Splicing factor, arginine/serine-rich 6;Isoform		0.66659	4	2	4	7.4	7.4	37.254	326
60S ribosomal protein L9;cDNA FLJ51990, highly similar to 60S ribosomal protein L9;Ribosomal protein L9, isoform CRA_d;cDNA FLJ52179, highly similar to 60S ribosomal protein L9	RPL9;OK/SW-cl.103;RPL9P7;RPL9P8;RPL9P9;hCG_37461	60S ribosomal protein L9;19 kDa protein;cDNA FLJ51990, highly similar to 60S ribosomal protein L9;cDNA FLJ52179, highly similar to 60S ribosomal protein L9;hypothetical protein;similar to rat ribosomal protein L9 homologue;10 kDa protein		0.66285	24	8	24	44.3	44.3	21.863	192
Elongation factor 1-beta	EEF1B2;EEF1B;EF1B	Elongation factor 1-beta		0.66244	8	4	8	24.4	24.4	24.763	225
Nucleolar GTP-binding protein 1;Chronic renal failure gene protein;GTP-binding protein NGB	GTPBP4;CRFG;NOG1	76 kDa protein;Nucleolar GTP-binding protein 1		0.66208	12	7	12	14.5	14.5	76.285	655
Polypyrimidine tract binding protein 1;Polypyrimidine tract binding protein 1, isoform CRA_c;Polypyrimidine tract-binding protein 1;Heterogeneous nuclear ribonucleoprotein I;57 kDa RNA-binding protein PPTB-1;Polypyrimidine tract-binding protein 1 isoform c variant;Putative uncharacterized protein PTBP1	PTBP1;hCG_20560;PTB	polypyrimidine tract-binding protein 1 isoform a;Isoform 2 of Polypyrimidine tract-binding protein 1;Isoform 1 of Polypyrimidine tract-binding protein 1;Polypyrimidine tract-binding protein 1 isoform c variant (Fragment);polypyrimidine tract-binding protei		0.66077	5	3	5	8.1	8.1	59.632	557
40S ribosomal protein S24	RPS24;DKFZp686N1586	ribosomal protein S24 isoform d;Isoform 1 of 40S ribosomal protein S24;ribosomal protein S24 isoform e;ribosomal protein S24 isoform f;Isoform 2 of 40S ribosomal protein S24		0.65314	12	3	12	11.8	11.8	32.43	289
Eukaryotic translation initiation factor 6;B4 integrin interactor;CAB;p27(BBP);B(2)GCN homolog	EIF6;EIF3A;ITGB4BP;OK/SW-cl.27	Eukaryotic translation initiation factor 6;eukaryotic translation initiation factor 6 isoform c;12 kDa protein		0.65232	11	5	12	33.1	33.1	26.599	245
60S ribosomal protein L35a;Cell growth-inhibiting gene 33 protein	RPL35A;GIG33	60S ribosomal protein L35a;11 kDa protein		0.65228	12	5	13	30	30	12.538	110
Cell growth-regulating nucleolar protein	LYAR;PNAS-5	Cell growth-regulating nucleolar protein		0.64947	6	2	6	7.7	7.7	43.614	379
60S ribosomal protein L4;L1;cDNA FLJ50996, highly similar to 60S ribosomal protein L4;cDNA FLJ50994, moderately similar to 60S ribosomal protein L4	RPL4;RPL1	60S ribosomal protein L4;cDNA FLJ50996, highly similar to 60S ribosomal protein L4;cDNA FLJ50994, moderately similar to 60S ribosomal protein L4		0.64929	56	22	57	46.8	46.8	47.697	427
60S ribosomal protein L6;TAX-responsive enhancer element-binding protein 107;Neoplasm-related protein C140	RPL6;TXREB1	60S ribosomal protein L6;60S ribosomal protein L6;60S ribosomal protein L6;similar to Ribosomal protein L6 isoform 7;similar to DNA-binding protein TAXREB107 isoform 1;similar to DNA-binding protein TAXREB107 isoform 2		0.64568	25	11	25	39.4	39.4	32.872	289
60S ribosomal protein L27a	RPL27A	60S ribosomal protein L27a;hypothetical protein LOC389435		0.64378	10	4	10	28.4	28.4	16.561	148
60S ribosomal protein L13;Breast basic conserved protein 1	RPL13;BBC1;OK/SW-cl.46	60S ribosomal protein L13;similar to RPL13 protein		0.64164	27	12	28	41.2	41.2	24.261	211
60S ribosomal protein L3;HIV-1 TAR RNA-binding protein B;Putative uncharacterized protein RPL3;RPL3 protein;Ribosomal protein L3, isoform CRA_b	RPL3;OK/SW-cl.32;hCG_2015191	60S ribosomal protein L3;ribosomal protein L3 isoform b;Ribosomal protein L3, isoform CRA_b;35 kDa protein;Putative uncharacterized protein RPL3;Protein		0.64011	31	12	33	34	34	46.108	403
PABPC4 protein;Polyadenylate-binding protein 4;Inducible poly(A)-binding protein;Activated-platelet protein 1;Poly(A) binding protein, cytoplasmic 4 (Inducible form);Poly(A) binding protein, cytoplasmic 4 (Inducible form), isoform CRA_e	PABPC4;APP1;PABP4;RP11-69E11.6-003;hCG_2031827	poly A binding protein, cytoplasmic 4 isoform 1;Isoform 1 of Polyadenylate-binding protein 4;Isoform 2 of Polyadenylate-binding protein 4;Poly		0.6362	8	5	8	16.2	8.3	72.39	660
60S ribosomal protein L32	RPL32;PP9932	Putative uncharacterized protein ENSP00000275524;60S ribosomal protein L32;13 kDa protein;11 kDa protein		0.63543	25	8	26	43.7	43.7	15.75	135
Putative uncharacterized protein RPL7P23;Putative uncharacterized protein RPL7;60S ribosomal protein L7;Putative uncharacterized protein ENSP00000260536;Similar to 60S ribosomal protein L7; similar to P18124 (PID:d133021)	RPL7P23;RPL7;WUGSC:H_RG054D04.1	Putative uncharacterized protein ENSP00000381447 (Fragment);Putative uncharacterized protein RPL7 (Fragment);30 kDa protein;60S ribosomal protein L7;Putative uncharacterized protein ENSP00000260536 (Fragment);hypothetical protein LOC648000;Putative unchara		0.63405	37	18	37	44	44	32.418	273
60S ribosomal protein L15;Ribosomal protein L15	RPL15;EC45;TCBAP0781;RP11-511D14.1-001	60S ribosomal protein L15;Ribosomal protein L15;22 kDa protein;cDNA FLJ51497, highly similar to 60S ribosomal protein L15;Ribosomal protein L15		0.63367	18	7	18	32.8	32.8	24.146	204
60S ribosomal protein L37a	RPL37A	60S ribosomal protein L37a		0.63293	9	3	9	41.3	41.3	10.275	92
40S ribosomal protein S26;Putative 40S ribosomal protein S26-like 1;HCG1745083;Putative uncharacterized protein RPS26;Similar to 40S ribosomal protein S26	RPS26;RPS26P11;RPS26L1;LOC285938;hCG_1745083;tcag7.125	40S ribosomal protein S26;10 kDa protein;similar to ribosomal protein S26;Putative 40S ribosomal protein S26-like 1;Putative uncharacterized protein RPS26;similar to hCG15685;13 kDa protein;13 kDa protein;similar to ribosomal protein S26;hypothetical prote		0.63156	5	3	5	31.3	31.3	13.015	115
THO complex subunit 4;Ally of AML-1 and LEF-1;Transcriptional coactivator Aly/REF;bZIP-enhancing factor BEF	THOC4;ALY;BEF	THO complex subunit 4;Protein		0.63138	10	4	10	26.1	26.1	27.557	264
Cytoskeleton-associated protein 4;63 kDa membrane protein;p63;Similar to cytoskeleton-associated protein 4	CKAP4	Isoform 1 of Cytoskeleton-associated protein 4;Similar to cytoskeleton-associated protein 4 (Fragment);Isoform 2 of Cytoskeleton-associated protein 4		0.63012	19	11	19	25.6	25.6	66.022	602
60S ribosomal protein L7a;Surfeit locus protein 3;PLA-X polypeptide;Putative uncharacterized protein ENSP00000372524;Ribosomal protein L7a	RPL7A;SURF-3;SURF3;RP11-244N20.10-004;RP11-244N20.10-005	60S ribosomal protein L7a;similar to ribosomal protein L7a;similar to ribosomal protein L7a;Ribosomal protein L7a;Ribosomal protein L7a		0.62415	31	14	31	38.7	38.7	29.995	266
40S ribosomal protein S21;Ribosomal protein S21;Ribosomal protein S21, isoform CRA_e	RPS21;RP5-908M14.8-003;hCG_41768	40S ribosomal protein S21;Ribosomal protein S21		0.62355	25	8	25	65.1	65.1	9.1113	83
60S ribosomal protein L18;Ribosomal protein L18	RPL18	60S ribosomal protein L18;cDNA FLJ59178, moderately similar to 60S ribosomal protein L18		0.62339	21	9	21	38.8	38.8	21.634	188
60S ribosomal protein L27	RPL27	60S ribosomal protein L27;60S ribosomal protein L27		0.62288	18	5	18	44.9	44.9	15.798	136
60S ribosomal protein L18a;cDNA FLJ51501, highly similar to 60S ribosomal protein L18a;cDNA FLJ51502, highly similar to 60S ribosomal protein L18a	RPL18A	60S ribosomal protein L18a;21 kDa protein;cDNA FLJ51501, highly similar to 60S ribosomal protein L18a;similar to ribosomal protein L18a isoform 1;cDNA FLJ51502, highly similar to 60S ribosomal protein L18a;similar to ribosomal protein L18a isoform 2		0.62194	31	13	32	52.3	52.3	20.762	176
Ribosomal protein L10;60S ribosomal protein L10;Protein QM;Tumor suppressor QM;Laminin receptor homolog;60S ribosomal protein L10-like	RPL10;XX-FW83563B9.1-011;DXS648E;QM;RPL10L;XX-FW83563B9.1-009	Ribosomal protein L10;60S ribosomal protein L10;ribosomal protein L10;similar to QM protein isoform 1;similar to Q1Z 7F5 isoform 1;60S ribosomal protein L10-like;similar to QM protein isoform 6;similar to QM protein isoform 1;similar to QM protein isoform		0.62145	22	12	26	50	50	26.593	230
60S ribosomal protein L22;Epstein-Barr virus small RNA-associated protein;EBER-associated protein;Heparin-binding protein HBp15	RPL22	60S ribosomal protein L22;11 kDa protein		0.61849	16	5	18	39.8	32.8	14.787	128
Plasminogen activator inhibitor 1 RNA-binding protein;PAI1 RNA-binding protein 1;SERPINE1 mRNA-binding protein 1	SERBP1;PAIRBP1;CGI-55	Isoform 1 of Plasminogen activator inhibitor 1 RNA-binding protein;Isoform 2 of Plasminogen activator inhibitor 1 RNA-binding protein;Isoform 3 of Plasminogen activator inhibitor 1 RNA-binding protein;Isoform 4 of Plasminogen activator inhibitor 1 RNA-bind		0.61796	25	12	27	44.4	44.4	44.965	408
60S ribosomal protein L19	RPL19	60S ribosomal protein L19;similar to ribosomal protein L19		0.61585	13	7	13	29.6	29.6	23.466	196
cDNA FLJ57954, highly similar to 60S ribosomal protein L28;60S ribosomal protein L28;Ribosomal protein L28 variant	RPL28	ribosomal protein L28 isoform 3;ribosomal protein L28 isoform 1;60S ribosomal protein L28;ribosomal protein L28 isoform 4;ribosomal protein L28 isoform 5		0.61035	9	4	9	21.3	21.3	19.148	169
60S ribosomal protein L17;60S ribosomal protein L23;PD-1;Putative uncharacterized protein RPL17P34;Putative uncharacterized protein ENSP00000352143	RPL17;RPL17P34	60S ribosomal protein L17;ribosomal protein L17-like;hypothetical protein LOC645441;hypothetical protein LOC642250;Putative uncharacterized protein RPL17;Putative uncharacterized protein ENSP00000352143		0.60996	34	10	35	46.2	46.2	21.397	184
60S ribosomal protein L10a;CSA-19;Neural precursor cell expressed developmentally down-regulated protein 6	RPL10A;NEDD6	25 kDa protein;60S ribosomal protein L10a		0.60591	30	12	30	49.3	49.3	25.031	219
60S ribosomal protein L21;Putative uncharacterized protein RPL21P7;Ribosomal protein L21 variant	RPL21;RPL21P7	60S ribosomal protein L21;hypothetical protein isoform 1;hypothetical protein;similar to ribosomal protein L21 isoform 1;similar to hCG1782414 isoform 2;Protein;similar to mCG4465, partial;similar to hCG2028654;Similar to 60S ribosomal protein L21;similar		0.60371	16	6	16	37.5	37.5	18.565	160
Histone H1.2;Histone H1d;Histone H1t;Testicular H1 histone;Histone H1.3;Histone H1c;Histone H1.4;Histone H1b;Histone H1.1	HIST1H1C;H1F2;HIST1H1T;H1FT;H1T;HIST1H1D;H1F3;HIST1H1E;H1F4;HIST1H1A;H1F1	Histone H1.2;Histone H1t;Histone H1.3;Histone H1.4;Histone H1.1		0.60289	3	2	3	12.7	12.7	21.364	213
Coiled-coil domain-containing protein 124	CCDC124	Coiled-coil domain-containing protein 124		0.58996	17	7	17	36.3	36.3	25.835	223
60S ribosomal protein L14;CAG-ISL 7;Putative uncharacterized protein RPL14P1;RPL14 protein	RPL14;RPL14P1	Ribosomal protein L14 variant;Putative uncharacterized protein RPL14L;60S ribosomal protein L14;RPL14 protein (Fragment)		0.58647	25	8	25	34.5	34.5	23.787	220
Ribosomal protein L36a;60S ribosomal protein L36a-like;60S ribosomal protein L36a;60S ribosomal protein L44;Cell migration-inducing gene 6 protein	RPL36A;RP1-164F3.1-004;RPL36AL;RPL44;MIG6	Protein;Ribosomal protein L36a;Putative uncharacterized protein ENSP00000382197;60S ribosomal protein L36a-like;60S ribosomal protein L36a;similar to mCG7611;similar to mCG7611		0.58174	4	2	4	9.4	9.4	15.67	138
60S ribosomal protein L13a;23 kDa highly basic protein;Novel protein similar to ribosomal protein L13a RPL13A;RPL13A protein	RPL13A;RP11-365K22.1-001	60S ribosomal protein L13a;similar to 23 kD highly basic protein;Novel protein similar to ribosomal protein L13a RPL13A;17 kDa protein;similar to 23 kD highly basic protein isoform 1;RPL13A protein		0.58162	24	11	24	41.9	41.9	23.577	203
60S ribosomal protein L36	RPL36	60S ribosomal protein L36		0.57661	20	9	20	38.1	38.1	12.254	105
40S ribosomal protein S28	RPS28	similar to 40S ribosomal protein S28;similar to 40S ribosomal protein S28;40S ribosomal protein S28;4 kDa protein		0.57359	18	6	18	42.9	42.9	10.272	91
Putative uncharacterized protein RPL23A;Ribosomal protein L23a, isoform CRA_a;60S ribosomal protein L23a	RPL23A	Ribosomal protein L23a, isoform CRA_a;Putative uncharacterized protein RPL23A;Protein;60S ribosomal protein L23a;18 kDa protein;18 kDa protein;similar to ribosomal protein L23a;similar to ribosomal protein L23a;hypothetical protein LOC729617;similar to rib		0.57264	19	10	22	35.6	35.6	21.916	194
Putative uncharacterized protein RPL26;60S ribosomal protein L26;60S ribosomal protein L26-like 1	RPL26;RPL26L1;RPL26P1	Putative uncharacterized protein RPL26P6;60S ribosomal protein L26;13 kDa protein;60S ribosomal protein L26-like 1;hypothetical protein LOC653147;8 kDa protein		0.57153	20	8	20	42.5	42.5	18.254	153
60S ribosomal protein L35;Similar to 60S ribosomal protein L35	RPL35;LOC154880;tcag7.829	60S ribosomal protein L35;similar to ribosomal protein L35;similar to ribosomal protein L35;similar to ribosomal protein L35;Similar to 60S ribosomal protein L35;11 kDa protein		0.56773	8	3	8	26	26	14.551	123
cDNA FLJ75801, highly similar to Homo sapiens retinoblastoma binding protein 8 (RBBP8), transcript variant 1, mRNA;Retinoblastoma-binding protein 8;CtBP-interacting protein;Retinoblastoma-interacting protein and myosin-like;Putative uncharacterized protein RBBP8;Retinoblastoma binding protein 8, isoform CRA_b	RBBP8;CTIP	RBBP8 protein;Retinoblastoma-binding protein 8;retinoblastoma binding protein 8 isoform b		0.56363	18	10	18	17.3	17.3	102.66	902
Treacle protein;Treacher Collins syndrome protein;cDNA FLJ57828, highly similar to Treacle protein;TCOF1 protein;TCOF1 protein variant;cDNA FLJ58017, moderately similar to Treacle protein	TCOF1;DKFZp434G1035	Isoform 4 of Treacle protein;Isoform 3 of Treacle protein;Isoform 1 of Treacle protein;Treacher Collins-Franceschetti syndrome 1 isoform e;Treacher Collins-Franceschetti syndrome 1 isoform a;Isoform 2 of Treacle protein;Treacher Collins-Franceschetti syndr		0.56262	2	2	2	2.1	2.1	155.93	1524
Serine/threonine protein phosphatase;Serine/threonine-protein phosphatase PP1-alpha catalytic subunit;Putative uncharacterized protein PPP1CA;Serine/threonine-protein phosphatase PP1-gamma catalytic subunit;Protein phosphatase 1C catalytic subunit;Serine/threonine-protein phosphatase PP1-beta catalytic subunit	PPP1CA;PPP1A;PPP1CC;PPP1CB	protein phosphatase 1, catalytic subunit, alpha isoform 3;Serine/threonine-protein phosphatase PP1-alpha catalytic subunit;protein phosphatase 1, catalytic subunit, alpha isoform 2;cDNA FLJ45714 fis, clone FEKID2002637, highly similar to Serine/threonine-p		0.56179	3	2	3	5.9	5.9	38.631	341
AP-3 complex subunit delta-1;Adapter-related protein complex 3 subunit delta-1;AP-3 complex subunit delta;Delta-adaptin	AP3D1;PRO0039	Isoform 5 of AP-3 complex subunit delta-1;Isoform 1 of AP-3 complex subunit delta-1;Isoform 2 of AP-3 complex subunit delta-1;Isoform 4 of AP-3 complex subunit delta-1;Isoform 3 of AP-3 complex subunit delta-1		0.54944	2	2	3	2.3	2.3	136.65	1215
Brix domain-containing protein 2;Ribosome biogenesis protein Brix	BXDC2;BRIX	Brix domain-containing protein 2		0.5473	2	1	2	3.7	3.7	41.401	353
60S ribosomal protein L8;cDNA FLJ53750, highly similar to 60S ribosomal protein L8	RPL8	60S ribosomal protein L8;32 kDa protein;26 kDa protein;cDNA FLJ53750, highly similar to 60S ribosomal protein L8		0.54561	44	17	44	59.9	59.9	28.024	257
Nucleolin;Protein C23;cDNA FLJ10452 fis, clone NT2RP1000966, highly similar to NUCLEOLIN;Nucleolin, isoform CRA_c;cDNA FLJ45706 fis, clone FEBRA2028457, highly similar to Nucleolin;NCL protein	NCL;hCG_33980	Nucleolin;Nucleolin, isoform CRA_c;cDNA FLJ45706 fis, clone FEBRA2028457, highly similar to Nucleolin;32 kDa protein;NCL protein		0.53925	37	18	39	21.8	21.8	76.613	710
Nucleophosmin;Nucleolar phosphoprotein B23;Numatrin;Nucleolar protein NO38;Nucleophosmin (Nucleolar phosphoprotein B23, numatrin);Nucleophosmin/B23.2	NPM1;NPM	Isoform 1 of Nucleophosmin;Isoform 2 of Nucleophosmin;nucleophosmin 1 isoform 3		0.53445	25	11	25	50.7	50.7	32.575	294
cDNA, FLJ95068, highly similar to Homo sapiens eukaryotic translation elongation factor 1 delta (guanine nucleotide exchange protein) (EEF1D), transcript variant 1, mRNA;Elongation factor 1-delta;Antigen NY-CO-4;EEF1D protein;Eukaryotic translation elongation factor 1 delta (Guanine nucleotide exchange protein), isoform CRA_a	EEF1D;hCG_1994718;EF1D	eukaryotic translation elongation factor 1 delta isoform 1;eukaryotic translation elongation factor 1 delta isoform 3;Elongation factor 1-delta;eukaryotic translation elongation factor 1 delta isoform 4		0.52344	5	3	5	7	7	71.407	647
Putative RNA-binding protein Luc7-like 2	LUC7L2;CGI-59;CGI-74	Isoform 1 of Putative RNA-binding protein Luc7-like 2;Isoform 2 of Putative RNA-binding protein Luc7-like 2		0.51877	3	2	3	6.1	6.1	46.513	392
60S ribosomal protein L34	RPL34	similar to Ribosomal protein L34;60S ribosomal protein L34		0.50736	4	1	4	7.2	7.2	14.515	125
Transcription factor BTF3;RNA polymerase B transcription factor 3	BTF3;NACB;OK/SW-cl.8	Isoform 1 of Transcription factor BTF3;Isoform 2 of Transcription factor BTF3		0.48385	4	2	4	23.3	23.3	22.168	206
Cytoskeleton-associated protein 5;Colonic and hepatic tumor over-expressed protein;Ch-TOG protein	CKAP5;KIAA0097	Isoform 1 of Cytoskeleton-associated protein 5;Isoform 2 of Cytoskeleton-associated protein 5		0.48003	4	2	4	1.6	1.6	225.49	2032
Interferon-inducible double stranded RNA-dependent protein kinase activator A;Protein kinase, interferon-inducible double stranded RNA-dependent activator;Protein activator of the interferon-induced protein kinase;PKR-associated protein X;PKR-associating protein X	PRKRA;PACT;RAX;HSD14;HSD-14	Isoform 1 of Interferon-inducible double stranded RNA-dependent protein kinase activator A;Isoform 2 of Interferon-inducible double stranded RNA-dependent protein kinase activator A;Isoform 3 of Interferon-inducible double stranded RNA-dependent protein ki		0.4726	2	1	2	6.1	6.1	34.404	313
cDNA FLJ50967, highly similar to Creatine kinase, ubiquitous mitochondrial (EC 2.7.3.2);Creatine kinase, ubiquitous mitochondrial;U-MtCK;Acidic-type mitochondrial creatine kinase;cDNA FLJ52442, highly similar to Creatine kinase, ubiquitous mitochondrial (EC 2.7.3.2);cDNA FLJ52224, highly similar to Creatine kinase, ubiquitous mitochondrial (EC 2.7.3.2)	CKMT1A;CKMT;CKMT1B	cDNA FLJ50967, highly similar to Creatine kinase, ubiquitous mitochondrial;Creatine kinase, ubiquitous mitochondrial;cDNA FLJ52454, highly similar to Creatine kinase, ubiquitous mitochondrial;cDNA FLJ52224, highly similar to Creatine kinase, ubiquitous mit		0.45993	17	8	17	26.1	26.1	50.436	448
PHD finger protein 6;PHD-like zinc finger protein;PHD finger protein 6, isoform CRA_d;cDNA FLJ60207, highly similar to PHD finger protein 6	PHF6;KIAA1823;AC004383.6-002;hCG_1783600	Isoform 1 of PHD finger protein 6;PHD finger protein 6;Isoform 2 of PHD finger protein 6;cDNA FLJ60207, highly similar to PHD finger protein 6		0.45223	9	5	9	24.7	24.7	41.29	365
Vigilin;High density lipoprotein-binding protein;cDNA FLJ56889, moderately similar to Vigilin;cDNA FLJ55700, moderately similar to Vigilin	HDLBP;HBP;VGL;DKFZp686L08115	Vigilin;cDNA FLJ56889, moderately similar to Vigilin;cDNA FLJ55700, moderately similar to Vigilin		0.42653	3	3	5	3.4	3.4	141.45	1268
Caprin-1;Cytoplasmic activation- and proliferation-associated protein 1;GPI-anchored membrane protein 1;GPI-anchored protein p137;p137GPI;Cell cycle-associated protein 1;Membrane component chromosome 11 surface marker 1;cDNA FLJ57278	CAPRIN1;GPIAP1;GPIP137;M11S1	Isoform 1 of Caprin-1;Isoform 2 of Caprin-1;cDNA FLJ57278		0.42583	2	1	2	1.6	1.6	78.365	709
Proliferating cell nuclear antigen;Cyclin	PCNA	Proliferating cell nuclear antigen		0.40659	2	1	2	5	5	28.768	261
Activated RNA polymerase II transcriptional coactivator p15;SUB1 homolog;Positive cofactor 4;p14	SUB1;PC4;RPO2TC1	Activated RNA polymerase II transcriptional coactivator p15		0.40102	9	5	9	37	37	14.395	127
ATP-binding cassette sub-family F member 1;ATP-binding cassette 50;TNF-alpha-stimulated ABC protein;ABCF1 protein	ABCF1;ABC50	Isoform 1 of ATP-binding cassette sub-family F member 1;Isoform 2 of ATP-binding cassette sub-family F member 1;cDNA FLJ56536, highly similar to ATP-binding cassette sub-family F member 1		0.38139	2	1	2	2	2	95.925	845
Acylamino-acid-releasing enzyme;Acyl-peptide hydrolase;Acylaminoacyl-peptidase;Oxidized protein hydrolase	APEH;D3F15S2;D3S48E;DNF15S2	Acylamino-acid-releasing enzyme;57 kDa protein		0.36078	9	5	9	10.8	10.8	81.224	732
Telomere-associated protein RIF1;Rap1-interacting factor 1 homolog	RIF1	Isoform 1 of Telomere-associated protein RIF1;Isoform 2 of Telomere-associated protein RIF1		0.27405	6	4	6	2.5	2.5	274.46	2472
REST corepressor 1;Protein CoREST;cDNA FLJ56809, highly similar to REST corepressor 3;REST corepressor 3;cDNA FLJ16298 fis, clone PERIC2007068, highly similar to REST corepressor 3;cDNA FLJ59439, highly similar to REST corepressor 3	RCOR1;KIAA0071;RCOR;RCOR3;KIAA1343	REST corepressor 1;REST corepressor 3 isoform a;Isoform 1 of REST corepressor 3;REST corepressor 3 isoform c;Isoform 2 of REST corepressor 3;cDNA FLJ59439, highly similar to REST corepressor 3		0.23183	4	2	4	5.6	5.6	53.027	482
Genetic suppressor element 1;KIAA0182 protein variant;cDNA FLJ45416 fis, clone BRHIP3033806	GSE1;KIAA0182	Isoform 1 of Genetic suppressor element 1;Isoform 3 of Genetic suppressor element 1;Isoform 2 of Genetic suppressor element 1;KIAA0182 protein variant (Fragment);cDNA FLJ45416 fis, clone BRHIP3033806		0.188	2	1	2	1.6	1.6	136.16	1217
RalA-binding protein 1;Ral-interacting protein 1;76 kDa Ral-interacting protein;Dinitrophenyl S-glutathione ATPase;Hypothetical rhabdomyosarcoma antigen MU-RMS-40.2A	RALBP1;RLIP1;RLIP76	RalA-binding protein 1;Hypothetical rhabdomyosarcoma antigen MU-RMS-40.2A		0.17887	5	3	5	7	7	76.063	655
RalBP1-associated Eps domain-containing protein 1;RalBP1-interacting protein 1	REPS1	Isoform 1 of RalBP1-associated Eps domain-containing protein 1;RALBP1 associated Eps domain containing 1 isoform a;RALBP1 associated Eps domain containing 1 isoform b		0.1517	20	10	20	19.6	19.6	86.661	796
