# Supplementary figures and images for: LINKIN, a new transmembrane protein necessary for cell adhesion
Source: eLife journal article supplement (doi:10.7554/elife.04449), 2014-12-01

Figure 6—figure supplement 1

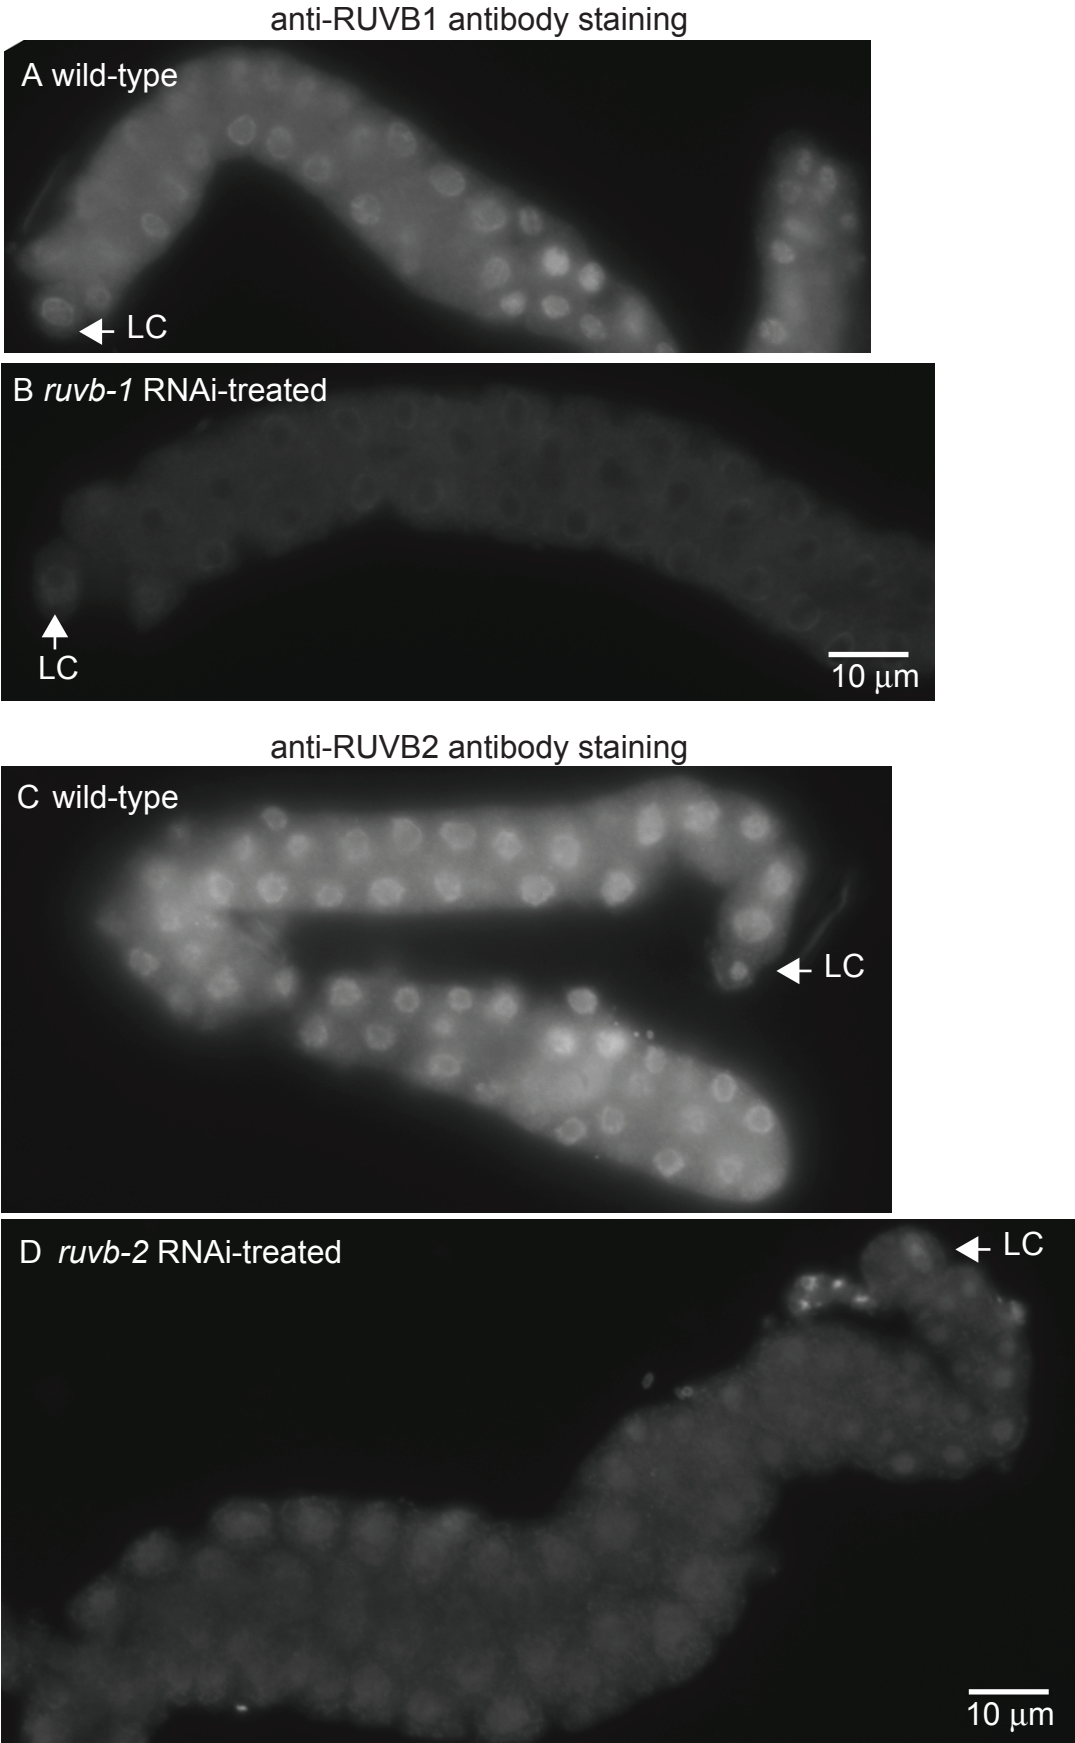

Supplement: supp [file elife-04449-supp-v1.zip › elife_poa_e04449_Figure_6_figure_supplement_1.pdf]

Figure 3—figure supplement 3

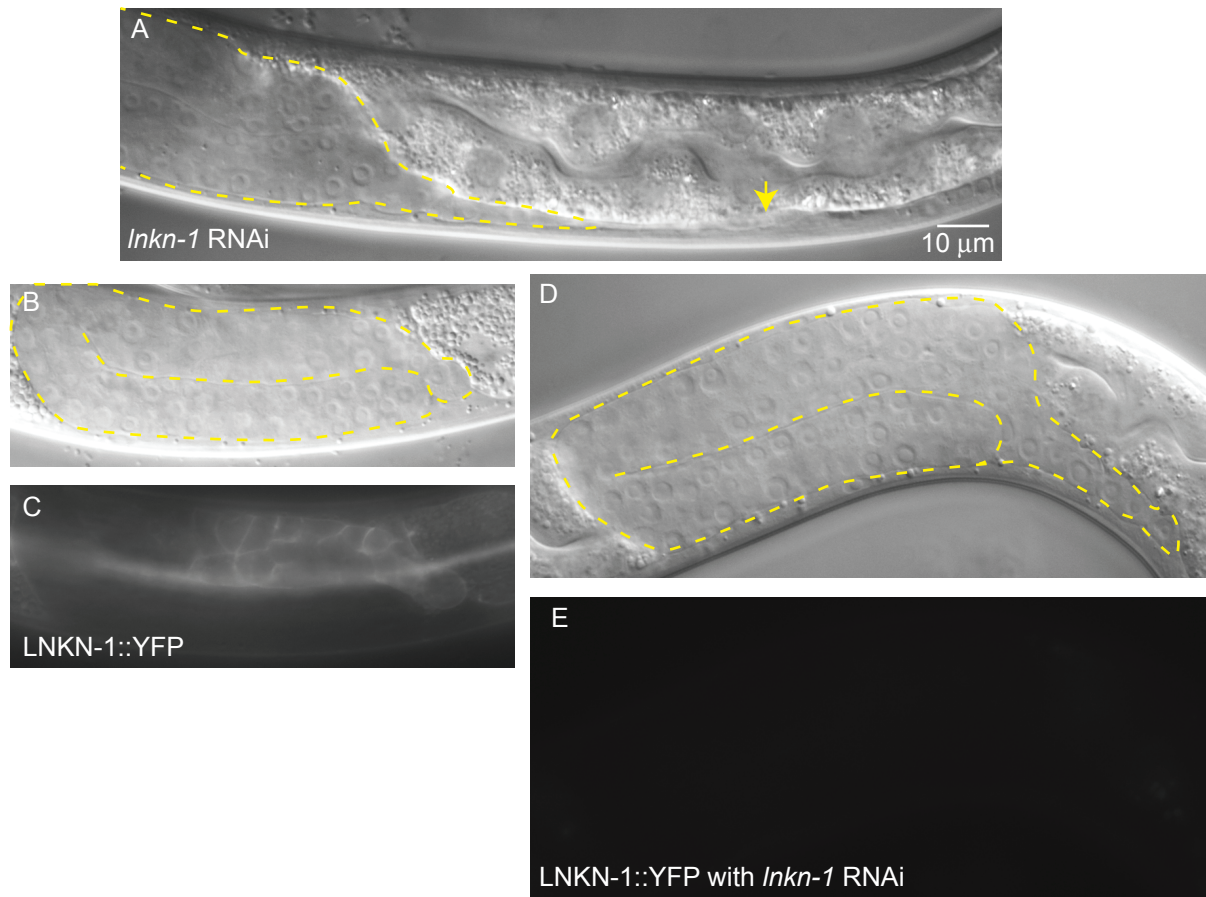

Supplement: supp [file elife-04449-supp-v1.zip › elife_poa_e04449_Figure_3_figure_supplement_3.pdf]

Figure 3—figure supplement 2

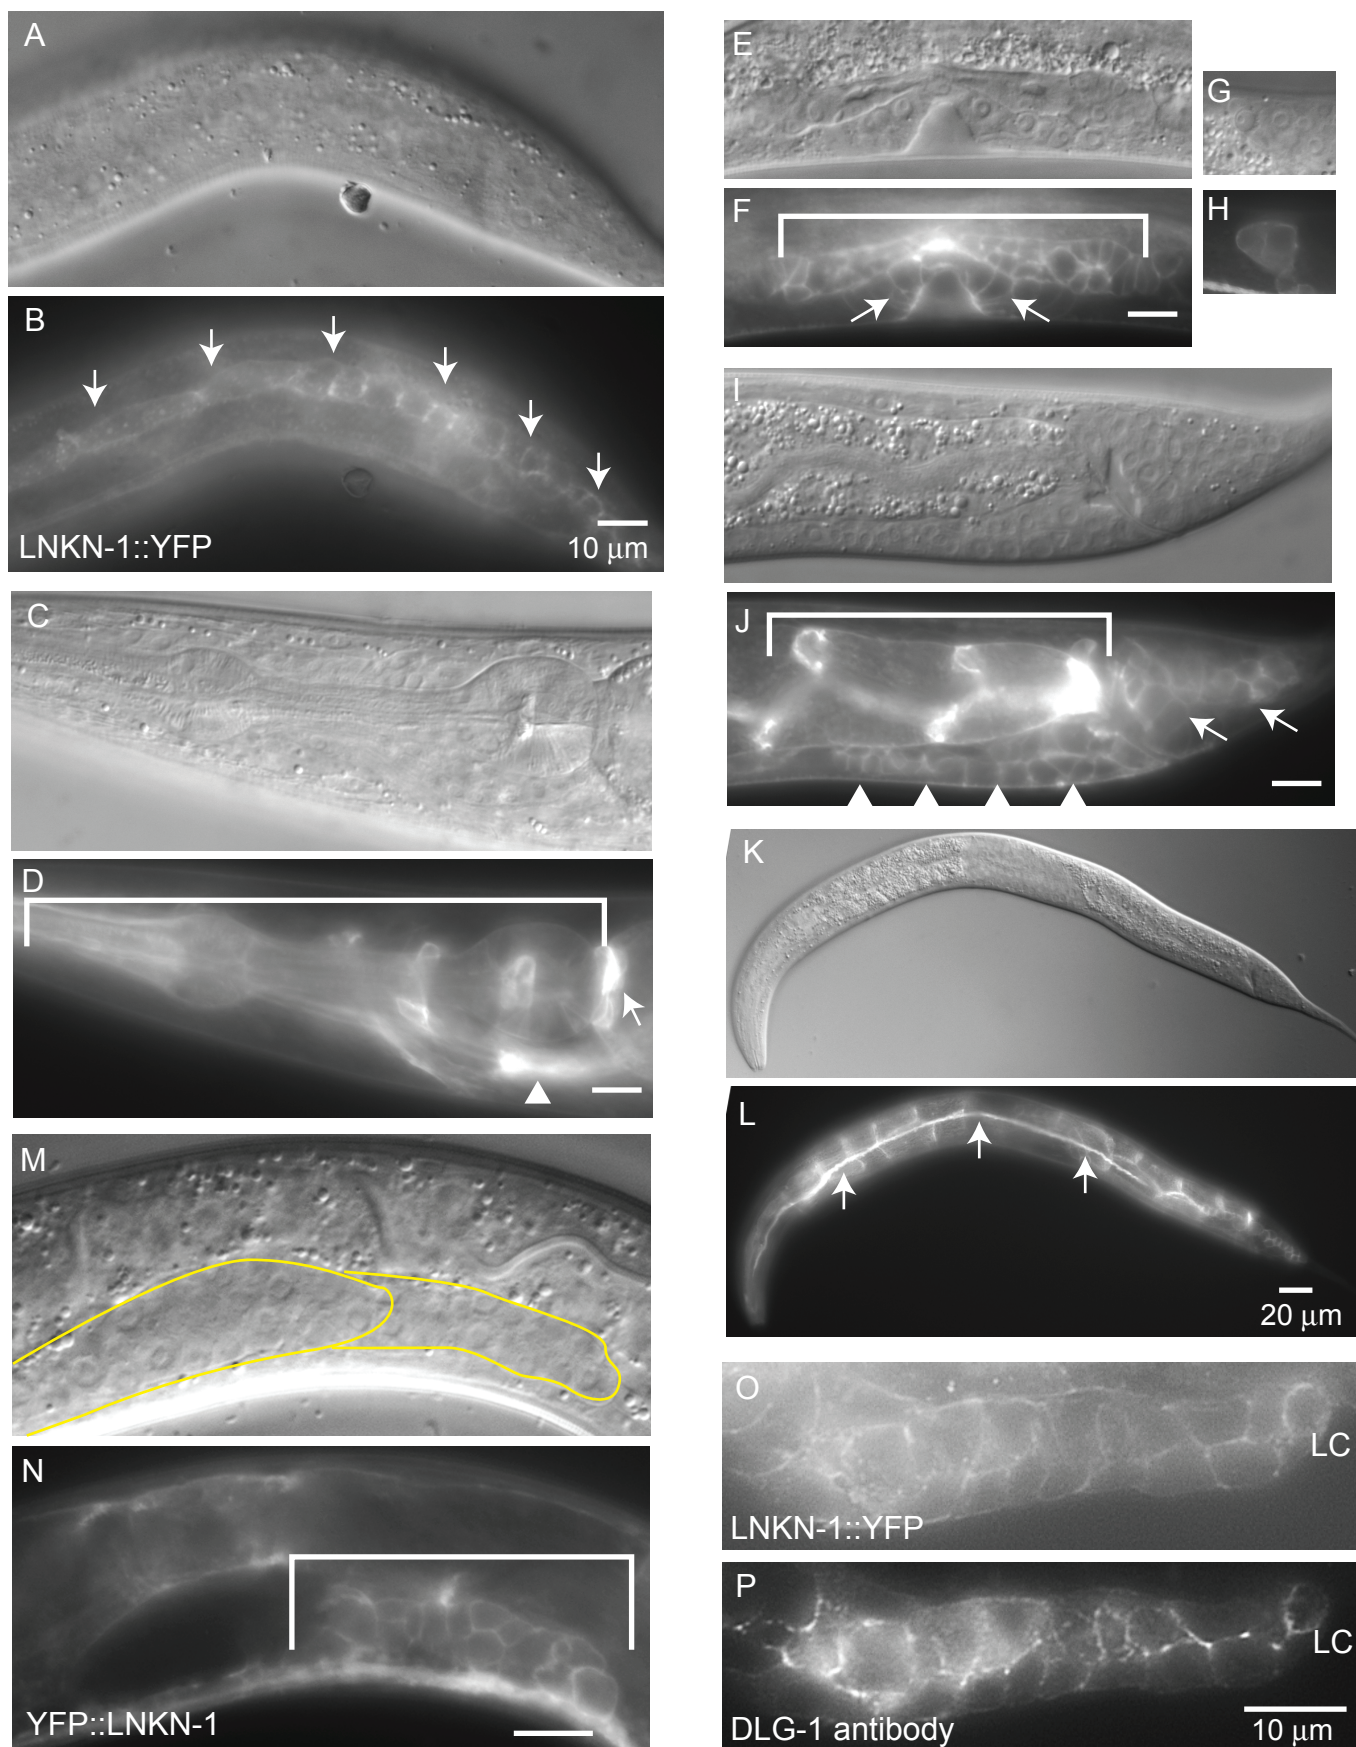

Supplement: supp [file elife-04449-supp-v1.zip › elife_poa_e04449_Figure_3_figure_supplement_2.pdf]
